# Supplementary material
Source: PubMed Central journal article supplement (PMC7059911)

# Reactivity Profiles of Diazo Amides, Esters and Ketones in Transition Metal Free C-H Insertion Reactions

Sarah E. Cleary, ‡,§ Xin Li, †,§ Li-Cheng Yang, † K. N. Houk, † Xin Hong<sup>†,\*</sup> and Matthias Brewer<sup>‡,\*</sup>

<sup>†</sup>Department of Chemistry, Zhejiang University, Hangzhou 310027, China

<sup>‡</sup>Department of Chemistry, The University of Vermont, Burlington, Vermont 05405, United States

<sup>§</sup>Department of Chemistry and Biochemistry, University of California, Los Angeles, California 90095, United States

## Table of contents:

|                                                                                                              |            |
|--------------------------------------------------------------------------------------------------------------|------------|
| <b>I) General Experimental Details</b> .....                                                                 | <b>S2</b>  |
| <b>II) Preparation of 2-Diazo-<i>N,N</i>-dimethylacetamide (S3)</b> .....                                    | <b>S3</b>  |
| <b>III) Preparation of <math>\beta</math>-hydroxy-<math>\alpha</math>-diazo carbonyls</b> .....              | <b>S3</b>  |
| <b>IV) Reaction of <math>\beta</math>-hydroxy-<math>\alpha</math>-diazo carbonyls with Lewis acids</b> ..... | <b>S4</b>  |
| <b>V) Computational details</b> .....                                                                        | <b>S8</b>  |
| <b>VI) Computations on the effects of triflate anion on chemoselectivity</b> .....                           | <b>S9</b>  |
| <b>VII) Computations on the effects of DCM solvent on chemoselectivity.</b> .....                            | <b>S12</b> |
| <b>VIII) Energies, enthalpies, and free energy of the calculated structures</b> .....                        | <b>S15</b> |
| <b>IX) Cartesian Coordinates for the Optimized Structures</b> .....                                          | <b>S17</b> |
| <b>X) References</b> .....                                                                                   | <b>S61</b> |
| <b>XI) NMR Spectra</b> .....                                                                                 | <b>S62</b> |

## I) General Experimental Details

All reactions were performed under an atmosphere of nitrogen in flame-dried glassware, or in a Discover® SP microwave synthesizer in a capped tube when specified. Solvents were removed under vacuum using a rotary evaporator attached to a dry vacuum pump.

Tetrahydrofuran (THF), dichloromethane (CH<sub>2</sub>Cl<sub>2</sub>), acetonitrile (MeCN) and toluene were dried via a solvent dispensing system. Diisopropylamine (*i*Pr<sub>2</sub>NH) and triethylamine (Et<sub>3</sub>N) were freshly distilled from CaH<sub>2</sub> prior to use. Scandium(III) triflate (ScOTf<sub>3</sub>) was dried under vacuum at 200 °C for 1 hour prior to use. All other commercially available reagents were used without further purification. 1-Diazo-3-methylbutan-2-one was prepared following a known procedure.<sup>1</sup>

Flash column chromatography was performed on a CombiFlash® Rf 150 system using RediSep® Rf Gold silica columns, or on 50-200 μm neutral alumina (Sorbent Technologies). TLC analysis was carried out using silica gel on glass plates or neutral alumina on foil plates. Visualization of TLC plates was achieved using ultraviolet light and ceric ammonium molybdate.

<sup>1</sup>H, <sup>13</sup>C, and <sup>19</sup>F NMR data was collected at room temperature on a 500 MHz spectrometer in CDCl<sub>3</sub>. <sup>1</sup>H NMR chemical shifts are reported in ppm (δ units) downfield from tetramethylsilane, and <sup>13</sup>C NMR spectra are referenced to the CDCl<sub>3</sub> signal at 77.0 ppm. Exact mass analysis was performed on a Waters Xevo G2-XS LCMS-QTOF operated in positive ESI mode.

## II) Preparation of 2-Diazo-*N,N*-dimethylacetamide (**S3**)

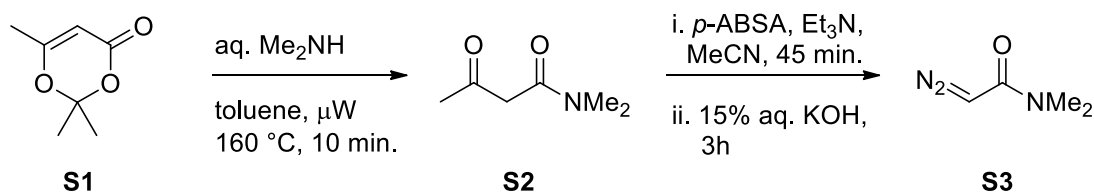

***N,N*-Dimethyl-3-oxobutanamide (**S2**):**<sup>2</sup> Prepared in accordance with Du *et al.* with the modification that 40% aqueous dimethylamine ( $\text{Me}_2\text{NH}$ ) was used. Silica gel flash column chromatography provided **S2** as colorless oil (73% yield).  $^1\text{H}$  NMR matched previously reported values.<sup>2</sup>

**2-Diazo-*N,N*-dimethylacetamide (**S3**):**<sup>3</sup> Prepared from  $\beta$ -ketoamide **S2** using the procedure specified by Bartlett *et al.* with the modification that *para*-acetamidobenzenesulfonyl azide (*p*-ABSA) was used in place of tosyl azide. After stirring in aqueous KOH for 3 hours, the solution was partitioned between 1:1 (v/v)  $\text{CH}_2\text{Cl}_2/\text{Et}_2\text{O}$  and 2.5N KOH saturated with NaCl. Layers were separated, and the organic layer was dried over  $\text{Na}_2\text{SO}_4$ , and solvent was removed under reduced pressure. The crude material was dissolved in EtOAc and eluted over a plug of neutral alumina. Alumina was washed with EtOAc, and filtrate was concentrated in vacuo to give pure  $\alpha$ -diazo amide **S3** as a yellow oil that solidified upon standing in freezer (89% yield).  $^1\text{H}$  NMR matched previously reported values.<sup>3</sup>

## III) Preparation of $\beta$ -hydroxy- $\alpha$ -diazo carbonyls

**General Procedure A:** A 0.28M solution of LDA (1.5 equiv) [freshly prepared by addition of *n*-butyllithium in hexanes (1.5 equiv) to a solution of *i*Pr<sub>2</sub>NH (1.7 equiv) in THF (3 mL per mmol of *n*-butyllithium)] was added dropwise over 15 min down the inside wall of a chilled flask containing a cold ( $-78\text{ }^\circ\text{C}$ ) stirred solution of cyclohexanone (1 equiv) and  $\alpha$ -diazo carbonyl (1.6 equiv) in THF (2 mL per mmol of ketone). The mixture was maintained at  $-78\text{ }^\circ\text{C}$  for 30 minutes. AcOH (0.5 M in THF, 1.7 equiv) was added at  $-78\text{ }^\circ\text{C}$  with rapid stirring under  $\text{N}_2$ , then the mixture was taken out of the cold bath, uncapped, and 10 mL water was

added. The layers were separated and the aqueous layer was extracted with 15 mL EtOAc. The organic layers were combined, washed with saturated aqueous NaHCO<sub>3</sub> (30 mL), water (30 mL), and brine (30 mL), then dried over anhydrous CaCl<sub>2</sub>. The solvent was removed *in vacuo* to provide an oily residue that was further purified as indicated to afford the desired  $\beta$ -hydroxy- $\alpha$ -diazo carbonyl.

**Methyl 2-diazo-2-(1-hydroxycyclohexyl)acetate (20):**<sup>4</sup> Prepared from cyclohexanone (0.10 mL, 0.97 mmol) and methyl 2-diazoacetate<sup>1</sup> (159 mg, 1.59 mmol) following General Procedure A. The crude residue was dissolved in hexanes and filtered using a fritted funnel. The filtrate was concentrated to give 190 mg (99% yield) of the title compound as an orange-yellow oil. <sup>1</sup>H and <sup>13</sup>C NMR matched previously reported values.<sup>4</sup>

**2-Diazo-2-(1-hydroxycyclohexyl)-*N,N*-dimethylacetamide (28):** Prepared from cyclohexanone (0.17 mL, 1.65 mmol) and 2-diazo-*N,N*-dimethylacetamide (**S3**, 290 mg, 2.56 mmol) following General Procedure A. The crude residue was dissolved in 1:1 hexanes/EtOAc and passed over a plug of neutral alumina. The alumina was washed with 1:1 hexanes/EtOAc (3  $\times$  20 mL). The filtrate was concentrated *in vacuo* and further dried under reduced pressure on a high vacuum line to give 318 mg (91% yield) of the title compound as a yellow oil: *R*<sub>f</sub> = 0.43 (7:1 hexanes/EtOAc on neutral alumina); <sup>1</sup>H NMR (500 MHz, CDCl<sub>3</sub>):  $\delta$  5.10 (s, 1H), 2.97 (s, 6H), 1.62-1.79 (m, 6H), 1.43 (dq, *J* = 10.6, 4.9 Hz, 2H), 1.32 (tq, *J* = 11.6, 6.5 Hz, 2H); <sup>13</sup>C NMR (125 MHz, CDCl<sub>3</sub>):  $\delta$  167.8, 72.6, 58.1, 37.3, 36.5, 25.2, 22.9. MS (ESI): Calculated for [C<sub>10</sub>H<sub>17</sub>N<sub>2</sub>NaO<sub>2</sub>]<sup>+</sup>: 234.1218. Found: 234.1213.

#### IV) Reaction of $\beta$ -hydroxy- $\alpha$ -diazo carbonyls with Lewis acids

**General procedure B:** Lewis acid (0.5 mmol) was dissolved in CH<sub>2</sub>Cl<sub>2</sub> (6 mL) and the solution was maintained at the indicated temperature for 5 min. A solution of  $\beta$ -hydroxy- $\alpha$ -diazo carbonyl (0.5 mmol) in CH<sub>2</sub>Cl<sub>2</sub> (2 mL) was added via syringe to the Lewis acid solution, and the syringe was rinsed with 2 mL CH<sub>2</sub>Cl<sub>2</sub>, which was also added to the Lewis

acid. The reaction was stirred for 10 min and was then cooled to 0 °C and quenched with 5% aqueous NaHCO<sub>3</sub> (10 mL). The layers were separated, and the aqueous layer was extracted three times using CH<sub>2</sub>Cl<sub>2</sub> (10 mL). The combined organic layers were washed with H<sub>2</sub>O and brine, dried over MgSO<sub>4</sub> and filtered. If quantitative NMR was used, a known quantity of the internal standard was dissolved in the organic filtrate, and the solvents were removed under reduced pressure. The crude residue was analyzed by qNMR when applicable, and purified by silica gel flash column chromatography.

**Table S1. Treatment of 20 with Lewis acids following General Procedure B**

| Entry | Lewis acid (1 equiv) | X  | Yield 27 (%)     | Yield 25 (%)    | Yield 18 (%)     | Yield 24 (%)     |
|-------|----------------------|----|------------------|-----------------|------------------|------------------|
| 1     | Sc(OTf) <sub>3</sub> | -- | --               | --              | 24% <sup>a</sup> | 17% <sup>a</sup> |
| 2     | SnCl <sub>4</sub>    | Cl | 66% <sup>b</sup> | 7% <sup>b</sup> | 14% <sup>b</sup> | --               |

<sup>a</sup>Yield determined by quantitative <sup>1</sup>H NMR using 4-fluorobenzophenone as internal standard.

<sup>b</sup>Yield determined by <sup>1</sup>H NMR using 4-chlorobenzaldehyde as internal standard.

**4, 5, 6, 7-Tetrahydroisobenzofuran-1(3H)-one (18):**<sup>5</sup> Observed from the treatment of **20** with Sc(OTf)<sub>3</sub> or SnCl<sub>4</sub> following General Procedure B (summarized in entries 1 and 2, respectively, Table S1). Yields were determined using quantitative <sup>1</sup>H NMR. <sup>1</sup>H and <sup>13</sup>C NMR matched previously reported values.<sup>5</sup>

**(E)-Methyl 2-(cyclohex-2-en-1-ylidene)acetate (24):**<sup>6</sup> Observed from the treatment of **20** with Sc(OTf)<sub>3</sub> following General Procedure B (summarized in entry 1, Table S1). The yield of 17% was determined by quantitative <sup>1</sup>H NMR using 4-fluorobenzophenone as an internal standard. <sup>1</sup>H matched previously reported values.<sup>6</sup>

**Methyl 2-chloro-2-cyclohexylideneacetate (25):**<sup>7</sup> Observed in 7% yield from the treatment of **20** with SnCl<sub>4</sub> following General Procedure B (entry 2, Table S1). Yield was determined by quantitative <sup>1</sup>H NMR using 4-chlorobenzaldehyde as an internal standard. <sup>1</sup>H matched previously reported values.<sup>7</sup>

**Methyl 2-(chloromethyl)cyclohex-1-enecarboxylate (27):** Obtained from **20** (43 mg, 0.22 mmol) and 1M SnCl<sub>4</sub> (0.22 mL, 0.22 mmol) following General Procedure B. A yield of 66% was determined by quantitative <sup>1</sup>H NMR using 4-chlorobenzaldehyde as an internal standard (entry 2, Table S1). Due to the instability to chromatography, silica gel flash column chromatography (100% CH<sub>2</sub>Cl<sub>2</sub>) provided a diminished 5.2 mg (12 % yield) of the title compound, which was used for characterization: *R*<sub>f</sub> = 0.88 (100% CH<sub>2</sub>Cl<sub>2</sub>); <sup>1</sup>H NMR (500 MHz, CDCl<sub>3</sub>): δ 4.40 (s, 2H), 3.75 (s, 3H), 2.29-2.34 (m, 4H), 1.59-1.67 (m, 4H); <sup>13</sup>C NMR (125 MHz, CDCl<sub>3</sub>) δ 168.2, 143.3, 129.1, 51.7, 44.9, 29.0, 26.7, 21.9, 21.8. MS (ESI): Calculated for [C<sub>9</sub>H<sub>14</sub>ClO<sub>2</sub>]<sup>+</sup>: 189.0682. Found: 189.0665.

**Table S2. Treatment of 28 with Lewis acids following General Procedure B**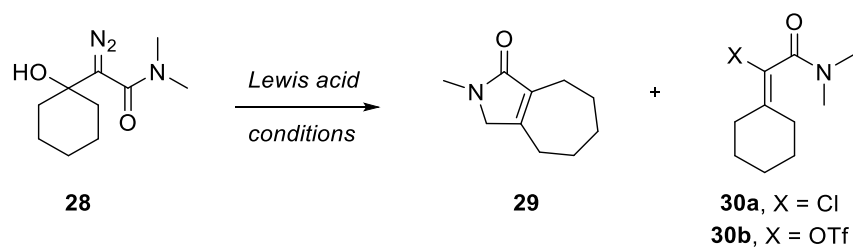

| Entry | Lewis Acid (1 equiv)                            | Solvent                         | Temp  | Yield 29 (%)        | Compound   | Yield 30 (%)           |
|-------|-------------------------------------------------|---------------------------------|-------|---------------------|------------|------------------------|
| 1     | (C <sub>6</sub> F <sub>5</sub> ) <sub>3</sub> B | CH <sub>2</sub> Cl <sub>2</sub> | rt    | 0%                  | -          | -                      |
| 2     | SnCl <sub>4</sub>                               | CH <sub>2</sub> Cl <sub>2</sub> | 0 °C  | Inseparable mixture | <b>30a</b> | 33%                    |
| 3     | Sc(OTf) <sub>3</sub>                            | CH <sub>2</sub> Cl <sub>2</sub> | rt    | 24%                 | <b>30b</b> | 25% (47%) <sup>a</sup> |
| 4     | Sc(OTf) <sub>3</sub>                            | MeCN                            | 40 °C | 24%                 | <b>30b</b> | 0%                     |
| 5     | Sc(OTf) <sub>3</sub> (2 equiv)                  | CH <sub>2</sub> Cl <sub>2</sub> | rt    | 26%                 | <b>30b</b> | 25%                    |
| 6     | In(OTf) <sub>3</sub>                            | CH <sub>2</sub> Cl <sub>2</sub> | 0 °C  | 17%                 | <b>30b</b> | 28%                    |
| 7     | TMSOTf                                          | CH <sub>2</sub> Cl <sub>2</sub> | 0 °C  | 6%                  | <b>30b</b> | 62%                    |
| 8     | Eu(fod) <sub>3</sub>                            | CH <sub>2</sub> Cl <sub>2</sub> | 40 °C | 0%                  | -          | -                      |
| 9     | Dy(OTf) <sub>3</sub>                            | MeCN                            | 30 °C | 13%                 | <b>30b</b> | -                      |

<sup>a</sup>Yield in parentheses was determined by <sup>19</sup>F NMR using 4-fluorobenzophenone as internal standard

**2-Methyl-2,3,5,6,7,8-hexahydrocyclohepta[c]pyrrol-1(4H)-one (29):** Obtained from **28** following General Procedure B. Results summarized in Table S2. *R<sub>f</sub>* = 0.18 (hexanes/EtOAc 1:1 on silica gel); <sup>1</sup>H NMR (500 MHz, CDCl<sub>3</sub>): δ 3.71 (s, 2H), 3.00 (s, 3H), 2.40 (td, *J* = 5.0, 1.2 Hz, 2H), 2.36 (dd, *J* = 6.7, 5.8 Hz, 2H), 1.78 (tt, *J* = 6.0, 3.8 Hz, 2H), 1.64 (dddd, *J* = 11.5, 7.4, 4.8, 2.1 Hz, 2H), 1.59 (ddt, *J* = 11.5, 7.6, 4.0 Hz, 2H); <sup>13</sup>C NMR (125 MHz, CDCl<sub>3</sub>) δ 172.7, 151.6, 134.8, 55.7, 31.1, 29.7, 29.1, 27.3, 27.2, 25.2. MS (ESI): Calculated for [C<sub>10</sub>H<sub>16</sub>NO]<sup>+</sup>: 166.1232. Found: 166.1232.

**2-Chloro-2-cyclohexylidene-*N,N*-dimethylacetamide (30a):** Obtained from **28** (50.6 mg, 0.24 mmol) and 1 M SnCl<sub>4</sub> (0.24 mL, 0.24 mmol) in CH<sub>2</sub>Cl<sub>2</sub> following General Procedure B (entry 2, Table S2). Silica gel flash column chromatography (hexanes/EtOAc, gradient

elution 0 to 50% EtOAc) gave 16.1 mg (33% yield) of the title compound as a colorless oil:  $R_f = 0.40$  (hexanes/EtOAc 1:1 on silica gel);  $^1\text{H NMR}$  (500 MHz,  $\text{CDCl}_3$ ):  $\delta$  3.03 (s, 3H), 3.00 (s, 3H), 2.37 (t,  $J = 6.0$  Hz, 2H), 2.16 (t,  $J = 5.2$  Hz, 2H), 1.54-1.66 (m, 6H);  $^{13}\text{C NMR}$  (125 MHz,  $\text{CDCl}_3$ )  $\delta$  166.2, 139.3, 114.8, 37.9, 34.5, 31.7, 29.8, 27.2, 26.6, 26.0. MS (ESI): Calculated for  $[\text{C}_{10}\text{H}_{17}\text{ClNO}]^+$ : 202.0999. Found: 202.1001.

**1-Cyclohexylidene-2-(dimethylamino)-2-oxoethyl trifluoromethanesulfonate (30b):**

Obtained from **28** following General Procedure B. Lewis acids and yields summarized in entries 3-7 and 9, Table S2.  $R_f = 0.10$  (hexanes/EtOAc 1:1 on silica gel);  $^1\text{H NMR}$  (500 MHz,  $\text{CDCl}_3$ ):  $\delta$  3.05 (s, 3H), 3.00 (s, 3H), 2.36 (br s, 2H), 2.21 (t,  $J = 5.9$  Hz, 2H), 1.55-1.69 (m, 6H);  $^{13}\text{C NMR}$  (125 MHz,  $\text{CDCl}_3$ )  $\delta$  162.4, 138.3, 131.7, 118.4 (q,  $J = 321$  Hz), 38.1, 34.8, 29.3, 28.0, 26.8, 26.5, 25.7;  $^{19}\text{F}$  (471 MHz,  $\text{CDCl}_3$ ):  $\delta$  -73.06 (s, 3F). MS (ESI): Calculated for  $[\text{C}_{11}\text{H}_{17}\text{F}_3\text{NO}_4\text{S}]^+$ : 316.0830. Found: 316.0829.

**V) Computational details**

All DFT calculations were conducted with the Gaussian 16 software package.<sup>8</sup> Geometry optimizations of all the minima and transition states were performed using B3LYP<sup>9-10</sup> functional with 6-311+G(d,p) basis set, including solvation energy corrections and Grimme's dispersion corrections.<sup>11</sup> To confirm whether each optimized stationary point is an energy minimum or a transition state, as well as evaluate the zero-point vibrational energy and thermal corrections at 298 K, the vibrational frequencies were computed at the same level of theory as for the geometry optimizations. The solvation energies were evaluated by a self-consistent reaction field (SCRF) using the PCM model.<sup>12-14</sup> Extensive conformational searches for the intermediates and transition states have been conducted to ensure that the lowest energy conformers were located. The 3D diagrams of molecules were generated using CYLView.<sup>15</sup>



## VI) Computations on the effects of triflate anion on chemoselectivity.

a)

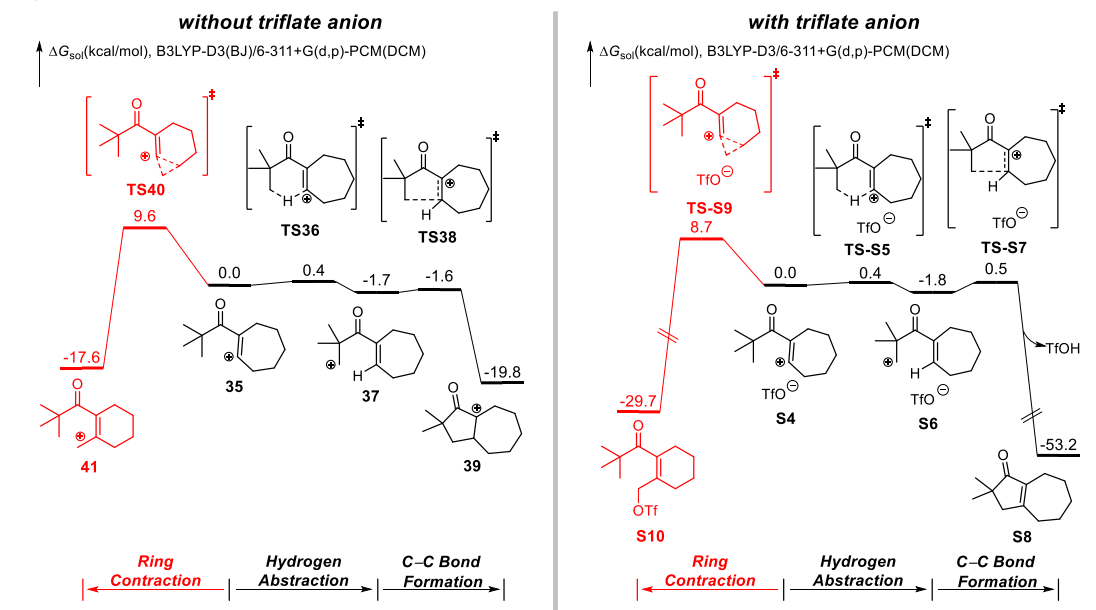

b)

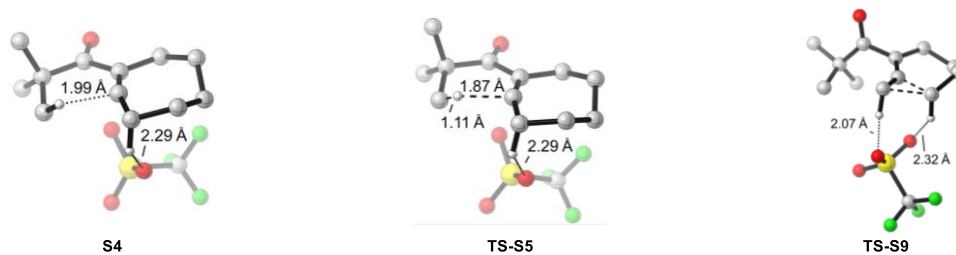

Figure S1. (a) Free energy diagram of chemoselectivity-determining processes of ketone vinyl cation, with and without triflate anion. (b) Optimized structures of key intermediate and transition states, trivial hydrogens are omitted for clarity.

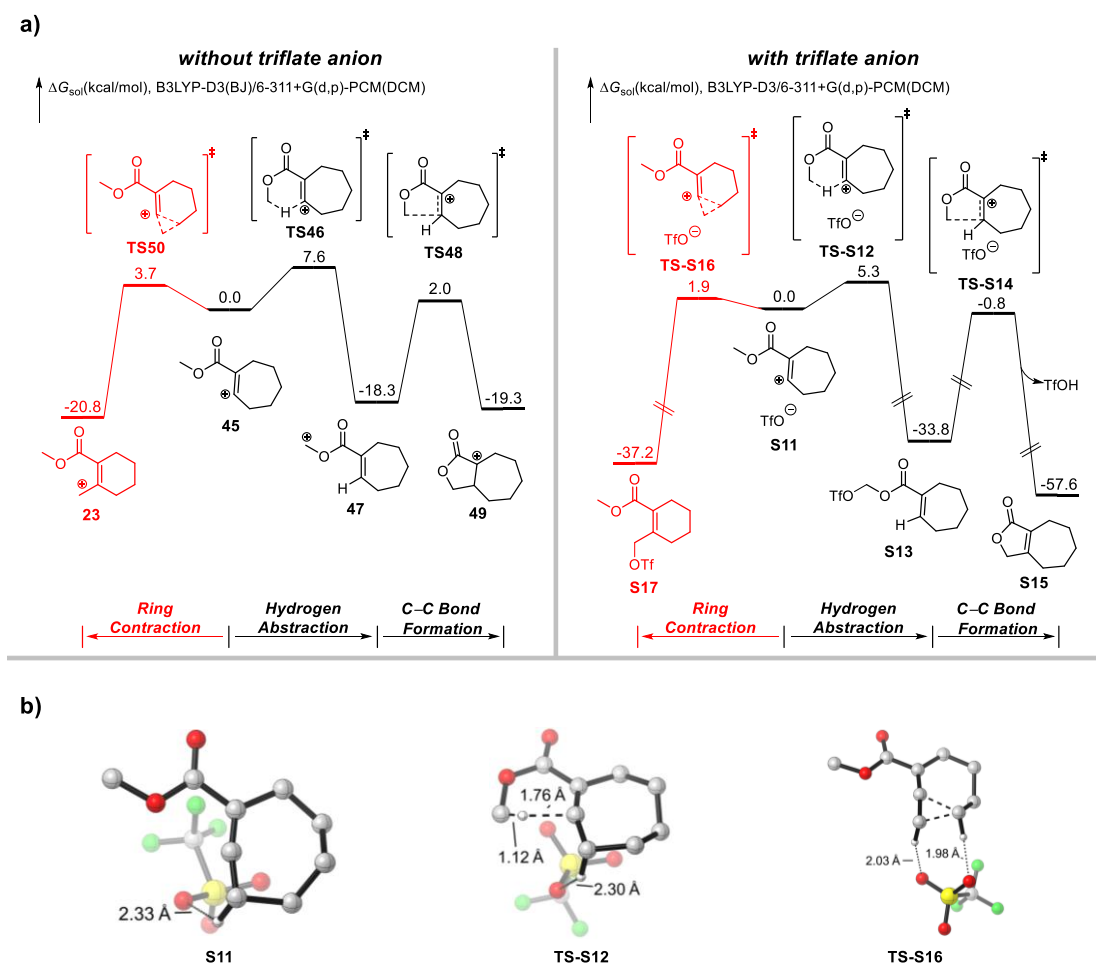

Figure S2. (a) Free energy diagram of chemoselectivity-determining processes of ester vinyl cation, with and without triflate anion. (b) Optimized structures of key intermediate and transition states, trivial hydrogens are omitted for clarity.

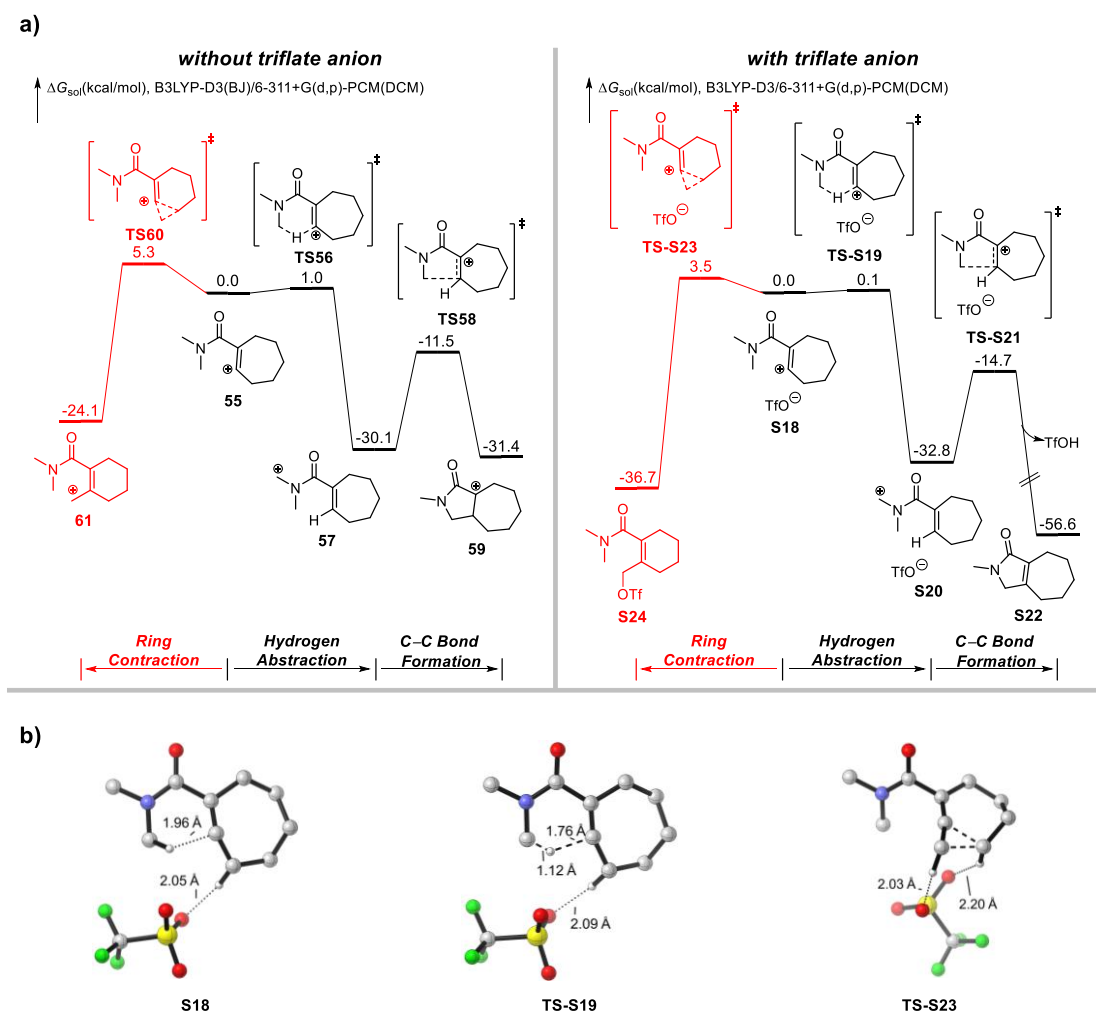

Figure S3. (a) Free energy diagram of chemoselectivity-determining processes of amide vinyl cation, with and without triflate anion. (b) Optimized structures of key intermediate and transition states, trivial hydrogens are omitted for clarity.

## VII) Computations on the effects of DCM solvent on chemoselectivity.

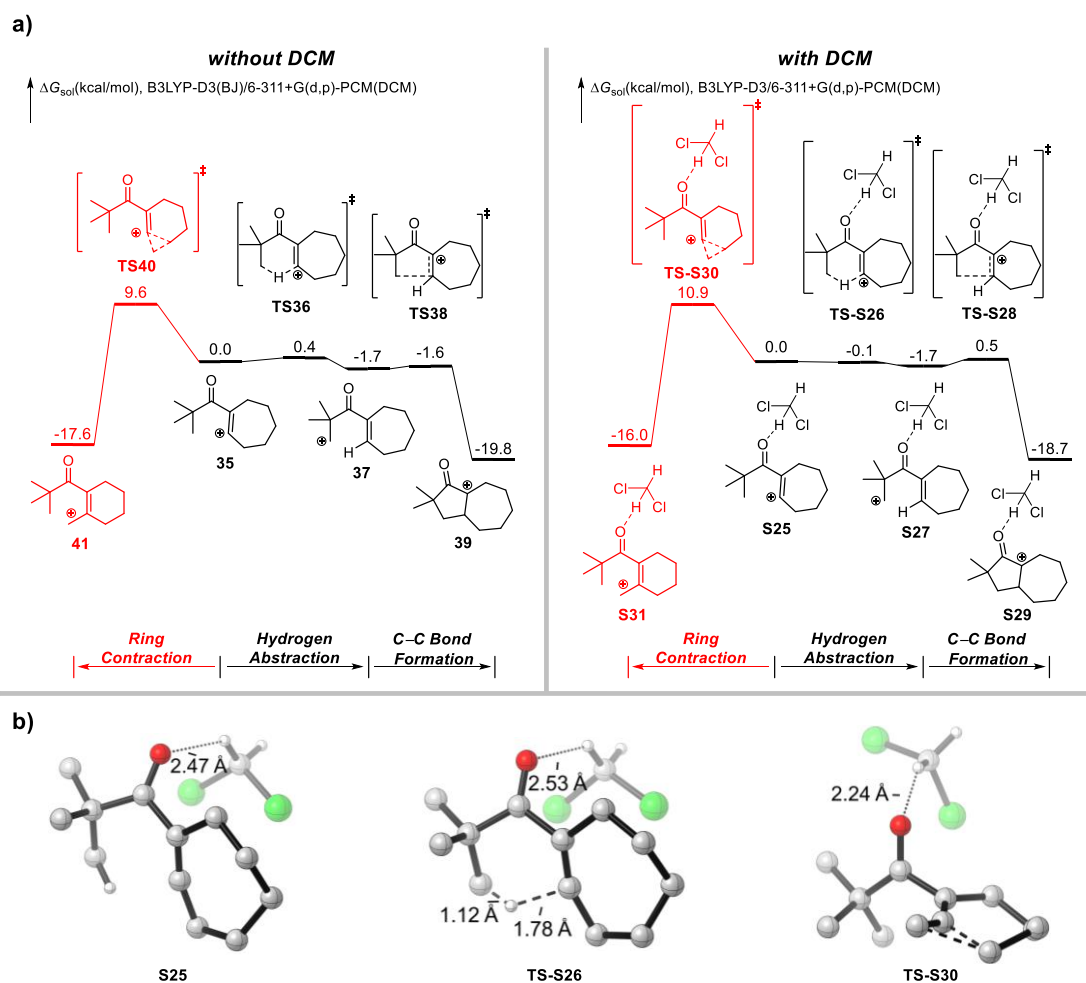

Figure S4. (a) Free energy diagram of chemoselectivity-determining processes of ketone vinyl cation, with and without DCM solvent. (b) Optimized structures of key intermediate and transition states, trivial hydrogens are omitted for clarity.

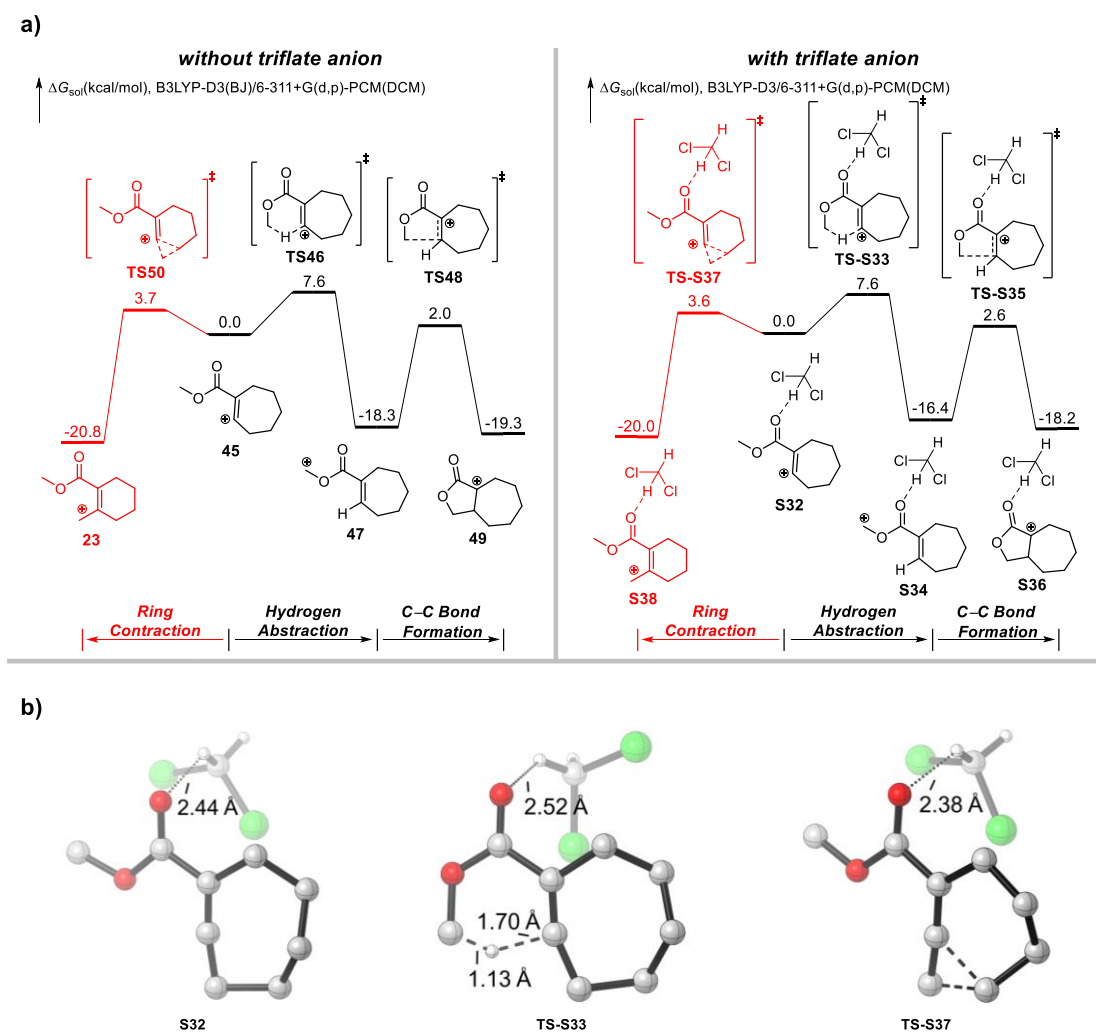

Figure S5. (a) Free energy diagram of chemoselectivity-determining processes of ester vinyl cation, with and without DCM solvent. (b) Optimized structures of key intermediate and transition states, trivial hydrogens are omitted for clarity.

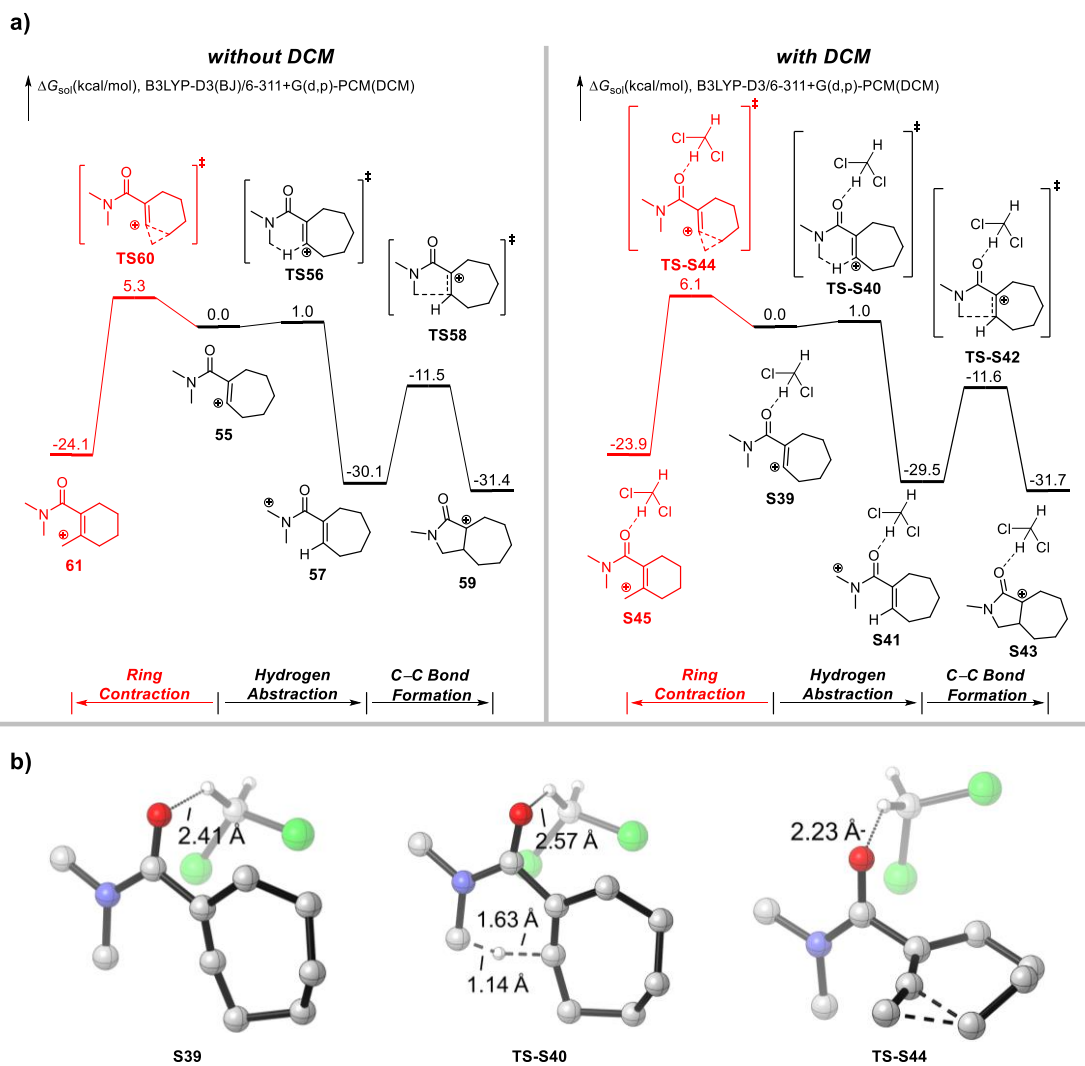

Figure S6. (a) Free energy diagram of chemoselectivity-determining processes of amide vinyl cation, with and without DCM solvent. (b) Optimized structures of key intermediate and transition states, trivial hydrogens are omitted for clarity.

## VIII) Energies, enthalpies, and free energy of the calculated structures

Zero-point correction (ZPE), thermal correction to enthalpy ( $\Delta H$ ), thermal correction to Gibbs free energy ( $\Delta G$ ), energies ( $E$ ), enthalpies ( $H$ ), Gibbs free energies ( $G$ ) (in Hartree) and imaginary frequencies of the transition states calculated at the B3LYP-D3/6-311+G(d,p)-PCM(Dichloromethane)

| Structures | ZPE      | tcH      | tcG      | E            | H            | G            | Imaginary Frequency |
|------------|----------|----------|----------|--------------|--------------|--------------|---------------------|
| 21         | 0.203982 | 0.216666 | 0.164964 | -501.134047  | -500.917381  | -500.969083  |                     |
| 23         | 0.203948 | 0.216410 | 0.165781 | -501.179729  | -500.963319  | -501.013948  |                     |
| 31         | 0.294578 | 0.311531 | 0.250982 | -653.455625  | -653.144094  | -653.204643  |                     |
| TS32       | 0.291126 | 0.308727 | 0.247302 | -653.427412  | -653.118685  | -653.180110  | 270.5i              |
| 33         | 0.283317 | 0.298707 | 0.242701 | -543.879261  | -543.580554  | -543.636560  |                     |
| TS34       | 0.281872 | 0.297047 | 0.241007 | -543.874660  | -543.577613  | -543.633653  | 131.8i              |
| 35         | 0.282535 | 0.297845 | 0.242154 | -543.888435  | -543.590590  | -543.646281  |                     |
| TS36       | 0.282123 | 0.296666 | 0.242939 | -543.888551  | -543.591885  | -543.645612  | 195.9i              |
| 37         | 0.283283 | 0.297684 | 0.244085 | -543.893001  | -543.595317  | -543.648916  |                     |
| TS38       | 0.282606 | 0.296691 | 0.243303 | -543.892193  | -543.595502  | -543.648890  | 330.6i              |
| 39         | 0.284618 | 0.298597 | 0.246256 | -543.924097  | -543.625500  | -543.677841  |                     |
| TS40       | 0.281324 | 0.296285 | 0.241275 | -543.872212  | -543.575927  | -543.630937  | 237.1i              |
| 41         | 0.282713 | 0.298166 | 0.241612 | -543.915872  | -543.617706  | -543.674260  |                     |
| 42         | 0.216171 | 0.229974 | 0.176243 | -610.725549  | -610.495575  | -610.549306  |                     |
| TS43       | 0.211917 | 0.226722 | 0.170381 | -610.696001  | -610.469279  | -610.525620  | 143.8i              |
| TS44       | 0.203146 | 0.215288 | 0.165694 | -501.130970  | -500.915682  | -500.965276  | 143.7i              |
| 45         | 0.204002 | 0.216544 | 0.166006 | -501.146857  | -500.930313  | -500.980851  |                     |
| 45-trans   | 0.204309 | 0.216346 | 0.167787 | -501.136136  | -500.919790  | -500.968349  |                     |
| TS46       | 0.202893 | 0.214299 | 0.166708 | -501.135428  | -500.921129  | -500.968720  | 199.8i              |
| 47         | 0.203369 | 0.216182 | 0.164992 | -501.174958  | -500.958776  | -501.009966  |                     |
| TS48       | 0.204957 | 0.215638 | 0.169899 | -501.147605  | -500.931967  | -500.977706  | 239.9i              |
| 49         | 0.205353 | 0.216226 | 0.169812 | -501.181391  | -500.965165  | -501.011579  |                     |
| TS50       | 0.203056 | 0.215168 | 0.165529 | -501.140546  | -500.925378  | -500.975017  | 220.9i              |
| 51         | 0.256540 | 0.272035 | 0.214702 | -630.183623  | -629.911588  | -629.968921  |                     |
| TS52       | 0.252900 | 0.268967 | 0.210567 | -630.156932  | -629.887965  | -629.946365  | 317.4i              |
| 53         | 0.244973 | 0.259317 | 0.204105 | -520.610163  | -520.350846  | -520.406058  |                     |
| TS54       | 0.243758 | 0.257527 | 0.204209 | -520.597426  | -520.339899  | -520.393217  | 164i                |
| 55         | 0.244168 | 0.258226 | 0.204577 | -520.608293  | -520.350067  | -520.403716  |                     |
| TS56       | 0.243407 | 0.256413 | 0.205420 | -520.607597  | -520.351184  | -520.402177  | 187.8i              |
| 57         | 0.247425 | 0.260494 | 0.209222 | -520.660942  | -520.400448  | -520.451720  |                     |
| TS58       | 0.246089 | 0.258405 | 0.209013 | -520.631002  | -520.372597  | -520.421989  | 342.9i              |
| 59         | 0.246786 | 0.259236 | 0.209500 | -520.663232  | -520.403996  | -520.453732  |                     |
| TS60       | 0.243142 | 0.257082 | 0.202872 | -520.598208  | -520.341126  | -520.395336  | 148.6i              |
| 61         | 0.244979 | 0.258878 | 0.205792 | -520.647911  | -520.389033  | -520.442119  |                     |
| N2         | 0.005572 | 0.008877 | -0.01286 | -109.5608662 | -109.5519892 | -109.5737262 |                     |
| TfOH       | 0.037683 | 0.046555 | 0.00412  | -962.2381958 | -962.1916408 | -962.2340758 |                     |
| S4         | 0.310119 | 0.334676 | 0.255167 | -1505.735541 | -1505.400865 | -1505.480374 |                     |
| TS-S5      | 0.309682 | 0.333501 | 0.255728 | -1505.735534 | -1505.402033 | -1505.479806 | 78.3i               |
| S6         | 0.310611 | 0.3343   | 0.25581  | -1505.739025 | -1505.404725 | -1505.483215 |                     |
| TS-S7      | 0.310297 | 0.333579 | 0.256156 | -1505.73578  | -1505.402201 | -1505.479624 | 374.4i              |
| S8         | 0.275174 | 0.28878  | 0.236602 | -543.5676202 | -543.2788402 | -543.3310182 |                     |

|        |          |          |          |              |              |              |        |
|--------|----------|----------|----------|--------------|--------------|--------------|--------|
| TS-S9  | 0.308767 | 0.332996 | 0.252792 | -1505.719231 | -1505.386235 | -1505.466439 | 279.4i |
| S10    | 0.314443 | 0.337832 | 0.260999 | -1505.788692 | -1505.45086  | -1505.527693 |        |
| S11    | 0.231534 | 0.253281 | 0.17882  | -1462.992023 | -1462.738742 | -1462.813203 |        |
| TS-S12 | 0.230792 | 0.251246 | 0.180457 | -1462.98528  | -1462.734034 | -1462.804823 | 193.5i |
| S13    | 0.236478 | 0.256107 | 0.185471 | -1463.052511 | -1462.796404 | -1462.86704  |        |
| TS-S14 | 0.231892 | 0.251784 | 0.18107  | -1462.99549  | -1462.743706 | -1462.81442  | 179.1i |
| S15    | 0.196437 | 0.206728 | 0.16171  | -500.8325948 | -500.6258668 | -500.6708848 |        |
| TS-S16 | 0.230563 | 0.251797 | 0.176326 | -1462.986531 | -1462.734734 | -1462.810205 | 185.7i |
| S17    | 0.235823 | 0.25609  | 0.185181 | -1463.057636 | -1462.801546 | -1462.872455 |        |
| S18    | 0.271057 | 0.294354 | 0.215585 | -1482.4508   | -1482.156446 | -1482.235215 |        |
| TS-S19 | 0.270586 | 0.293055 | 0.215725 | -1482.450714 | -1482.157659 | -1482.234989 | 129.3i |
| S20    | 0.274962 | 0.297225 | 0.221882 | -1482.50933  | -1482.212105 | -1482.287448 |        |
| TS-S21 | 0.273306 | 0.294701 | 0.222001 | -1482.479859 | -1482.185158 | -1482.257858 | 322.2i |
| S22    | 0.236209 | 0.248521 | 0.198949 | -520.2902942 | -520.0417732 | -520.0913452 |        |
| TS-S23 | 0.271028 | 0.293995 | 0.215878 | -1482.445472 | -1482.151477 | -1482.229594 | 166.6i |
| S24    | 0.275807 | 0.297931 | 0.222799 | -1482.516512 | -1482.218581 | -1482.293713 |        |
| S25    | 0.31309  | 0.334029 | 0.262881 | -1503.676934 | -1503.342905 | -1503.414053 |        |
| TS-S26 | 0.312182 | 0.33238  | 0.262481 | -1503.676741 | -1503.344361 | -1503.41426  | 136.7i |
| S27    | 0.313532 | 0.333537 | 0.263934 | -1503.680638 | -1503.347101 | -1503.416704 |        |
| TS-S28 | 0.312859 | 0.332635 | 0.261702 | -1503.674903 | -1503.342268 | -1503.413201 | 367.4i |
| S29    | 0.315668 | 0.334985 | 0.268407 | -1503.712323 | -1503.377338 | -1503.443916 |        |
| TS-S30 | 0.312088 | 0.332522 | 0.261698 | -1503.658332 | -1503.32581  | -1503.396634 | 232.4i |
| S31    | 0.313627 | 0.334428 | 0.262636 | -1503.702137 | -1503.367709 | -1503.439501 |        |
| S32    | 0.234474 | 0.252532 | 0.185456 | -1460.933859 | -1460.681327 | -1460.748403 |        |
| TS-S33 | 0.233286 | 0.250249 | 0.186466 | -1460.922817 | -1460.672568 | -1460.736351 | 202.6i |
| S34    | 0.234848 | 0.25258  | 0.187644 | -1460.962113 | -1460.709533 | -1460.774469 |        |
| TS-S35 | 0.23538  | 0.251693 | 0.189311 | -1460.9336   | -1460.681907 | -1460.744289 | 240.3i |
| S36    | 0.236747 | 0.252748 | 0.192867 | -1460.970325 | -1460.717577 | -1460.777458 |        |
| TS-S37 | 0.233696 | 0.251307 | 0.185325 | -1460.928011 | -1460.676704 | -1460.742686 | 215.4i |
| S38    | 0.234446 | 0.252456 | 0.185253 | -1460.965481 | -1460.713025 | -1460.780228 |        |
| S39    | 0.275141 | 0.294555 | 0.225816 | -1480.397572 | -1480.103017 | -1480.171756 |        |
| TS-S40 | 0.274228 | 0.292582 | 0.226783 | -1480.396936 | -1480.104354 | -1480.170153 | 182.9i |
| S41    | 0.277749 | 0.296356 | 0.229606 | -1480.448345 | -1480.151989 | -1480.218739 |        |
| TS-S42 | 0.276426 | 0.294332 | 0.229211 | -1480.41943  | -1480.125098 | -1480.190219 | 311.8i |
| S43    | 0.277691 | 0.295538 | 0.230165 | -1480.452472 | -1480.156934 | -1480.222307 |        |
| TS-S44 | 0.273995 | 0.293279 | 0.2244   | -1480.38642  | -1480.093141 | -1480.16202  | 147.9i |
| S45    | 0.275467 | 0.294891 | 0.225692 | -1480.435518 | -1480.140627 | -1480.209826 |        |



## IX) Cartesian Coordinates for the Optimized Structures

### 21

|   |             |             |             |
|---|-------------|-------------|-------------|
| C | 2.47389608  | -1.37958541 | -0.41085500 |
| C | 3.40557956  | -0.16961813 | -0.32410886 |
| C | 2.63915948  | 1.14327169  | -0.50269566 |
| C | 1.49950619  | 1.29146519  | 0.51533543  |
| C | 0.61789651  | 0.04585714  | 0.46167075  |
| C | 1.33630835  | -1.31417270 | 0.61652040  |
| H | 3.30438226  | 2.00006696  | -0.36904363 |
| H | 3.91543245  | -0.16881332 | 0.64543956  |
| H | 4.17933606  | -0.24876400 | -1.09045941 |
| H | 2.04816156  | -1.46408862 | -1.41509927 |
| H | 3.02203832  | -2.30588936 | -0.21713699 |
| H | 1.89207457  | 1.32192161  | 1.53717342  |
| H | 0.90218160  | 2.18359911  | 0.34329482  |
| H | 1.71698789  | -1.30873771 | 1.64286841  |
| H | 0.64055720  | -2.14383484 | 0.51198076  |
| H | 2.22880036  | 1.21081722  | -1.51458187 |
| C | -0.63676022 | 0.03079677  | 0.24846305  |
| C | -2.02682225 | 0.25952780  | 0.01541244  |
| C | -4.24792008 | -0.47382784 | -0.28600925 |
| H | -4.72049255 | -1.44952644 | -0.28346255 |
| H | -4.62301912 | 0.15186046  | 0.52067367  |
| H | -4.35786588 | 0.01832188  | -1.24973119 |
| O | -2.23752735 | 1.45303673  | -0.08545941 |
| O | -2.82535599 | -0.75758019 | -0.05188161 |

### 23

|   |             |             |             |
|---|-------------|-------------|-------------|
| C | 2.33241647  | 1.02784793  | -0.05259186 |
| C | 2.85072154  | -0.30949739 | -0.58738533 |
| C | 2.24600138  | -1.46909512 | 0.20368223  |
| C | 0.72051379  | -1.46156727 | 0.09675172  |
| C | 0.08758732  | -0.13658782 | 0.14044627  |
| C | 0.82171339  | 1.06617281  | 0.04263885  |
| H | 2.61747120  | -2.42853961 | -0.15781391 |
| H | 2.59385811  | -0.40911000 | -1.64746058 |
| H | 3.93914927  | -0.32958649 | -0.51865332 |
| H | 2.73414305  | 1.20435853  | 0.95090435  |
| H | 2.66622229  | 1.85762255  | -0.67766956 |
| H | 0.39003635  | -1.87203899 | -0.87842433 |
| H | 0.22697334  | -2.12122950 | 0.82100179  |
| H | 2.53041089  | -1.38918413 | 1.25680659  |
| C | -1.40282354 | -0.12795629 | 0.34770663  |
| C | -3.53151756 | -0.28686977 | -0.67397649 |
| H | -3.87668649 | -0.39454997 | -1.69668376 |
| H | -3.81028508 | -1.14805474 | -0.07001154 |
| H | -3.90477229 | 0.63305300  | -0.22771364 |
| O | -1.83524614 | -0.08024043 | 1.47318756  |
| O | -2.07495235 | -0.21852369 | -0.77735675 |
| C | 0.12351546  | 2.24172052  | 0.02476100  |
| H | -0.95587552 | 2.28174510  | 0.10690111  |
| H | 0.63905214  | 3.19093477  | -0.07023603 |

### 31

|   |            |             |             |
|---|------------|-------------|-------------|
| C | 2.77259409 | -1.60589021 | -0.29836684 |
|---|------------|-------------|-------------|

|   |             |             |             |
|---|-------------|-------------|-------------|
| C | 3.91775174  | -0.59817361 | -0.20021879 |
| C | 3.41847948  | 0.83769264  | -0.35819170 |
| C | 2.27052623  | 1.15490250  | 0.64839403  |
| C | 1.20143720  | 0.13619305  | 0.45824492  |
| C | 1.63636442  | -1.26258234 | 0.71088981  |
| H | 4.21889482  | 1.55866051  | -0.18293205 |
| H | 4.41895634  | -0.70736483 | 0.76739385  |
| H | 4.66310114  | -0.81193634 | -0.97071119 |
| H | 2.35181635  | -1.61366275 | -1.30753897 |
| H | 3.11557789  | -2.61862281 | -0.08014998 |
| H | 2.66091014  | 1.05469228  | 1.66551841  |
| H | 1.92677050  | 2.17966125  | 0.51987437  |
| H | 2.05664510  | -1.29279056 | 1.72176015  |
| H | 0.82945728  | -1.98369768 | 0.63977662  |
| H | 3.04959733  | 1.00262106  | -1.37491161 |
| C | -0.05446818 | 0.44188724  | -0.01188253 |
| C | -1.17403359 | -0.56455252 | -0.35048484 |
| C | -2.61019261 | -0.28813906 | 0.09122134  |
| C | -3.28982518 | 0.60758377  | -0.97525538 |
| H | -3.23044149 | 0.15158956  | -1.96496458 |
| H | -4.34378190 | 0.71328153  | -0.71018297 |
| H | -2.86760578 | 1.61115721  | -1.02793510 |
| C | -2.63861441 | 0.38843540  | 1.47407957  |
| H | -3.67634835 | 0.47821206  | 1.79999671  |
| H | -2.10221742 | -0.20515289 | 2.21768904  |
| H | -2.21962271 | 1.39589460  | 1.46948276  |
| C | -3.34991945 | -1.63471882 | 0.15458691  |
| H | -4.38369582 | -1.45713651 | 0.45632557  |
| H | -3.35146220 | -2.13231519 | -0.81516443 |
| H | -2.88796996 | -2.30350069 | 0.88355116  |
| O | -0.82064977 | -1.56232368 | -0.92339051 |
| N | -0.32246412 | 1.75757848  | -0.22700892 |
| N | -0.58218512 | 2.81418435  | -0.44785583 |

### TS32

|   |             |             |             |
|---|-------------|-------------|-------------|
| C | -2.83001447 | -1.61027507 | 0.28757241  |
| C | -3.86365576 | -0.52729594 | 0.59201491  |
| C | -3.18578734 | 0.81633614  | 0.86571693  |
| C | -2.25830756 | 1.23023495  | -0.29434153 |
| C | -1.26468469 | 0.13718386  | -0.57775895 |
| C | -1.90447523 | -1.22282755 | -0.87984318 |
| H | -3.92638642 | 1.60726572  | 0.99985150  |
| H | -4.54943998 | -0.42559101 | -0.25630685 |
| H | -4.46552986 | -0.81969077 | 1.45554059  |
| H | -2.22122030 | -1.81331065 | 1.17445487  |
| H | -3.31761886 | -2.54946632 | 0.01376915  |
| H | -2.84865845 | 1.35868768  | -1.20752648 |
| H | -1.76495468 | 2.17277040  | -0.07328207 |
| H | -2.48356730 | -1.07494030 | -1.79730396 |
| H | -1.15553135 | -1.98306401 | -1.07222151 |
| H | -2.59906826 | 0.76356142  | 1.78809809  |
| C | 0.04279338  | 0.18563508  | -0.54240656 |
| C | 1.27562795  | -0.63832882 | -0.51434291 |
| C | 2.49217107  | -0.37750114 | 0.35812375  |
| C | 3.21130912  | -1.72670042 | 0.54551220  |
| H | 3.52638275  | -2.14748078 | -0.40931556 |
| H | 4.09704070  | -1.56588541 | 1.16220834  |

|   |            |             |             |
|---|------------|-------------|-------------|
| H | 2.56792032 | -2.45183288 | 1.04723292  |
| C | 2.07542092 | 0.17556757  | 1.73460887  |
| H | 2.96585047 | 0.25180887  | 2.36104300  |
| H | 1.62787145 | 1.16770622  | 1.68722108  |
| H | 1.37115961 | -0.49552724 | 2.23110636  |
| C | 3.44974652 | 0.59164028  | -0.37837208 |
| H | 4.35459028 | 0.69565241  | 0.22352855  |
| H | 3.73226864 | 0.19129935  | -1.35358677 |
| H | 3.03435059 | 1.58729796  | -0.52029791 |
| O | 1.11918506 | -1.62066131 | -1.20993781 |
| N | 0.53984331 | 2.07185010  | -0.26924735 |
| N | 0.83907139 | 3.11039961  | -0.44805702 |

### 33

|   |             |             |             |
|---|-------------|-------------|-------------|
| C | -2.89200302 | -1.42160697 | 0.37681640  |
| C | -3.89584287 | -0.26794460 | 0.33583308  |
| C | -3.20341227 | 1.08370768  | 0.52628433  |
| C | -2.09511519 | 1.31788363  | -0.51341841 |
| C | -1.14428408 | 0.12832284  | -0.49833416 |
| C | -1.77785051 | -1.25707373 | -0.66947635 |
| H | -3.91945696 | 1.90359287  | 0.43070251  |
| H | -4.42708176 | -0.27762960 | -0.62219206 |
| H | -4.64640136 | -0.40828391 | 1.11666838  |
| H | -2.44126986 | -1.49745443 | 1.37100529  |
| H | -3.38682017 | -2.37511076 | 0.17519739  |
| H | -2.51419228 | 1.34716824  | -1.52502158 |
| H | -1.54880080 | 2.24085700  | -0.33417845 |
| H | -2.18772550 | -1.26077676 | -1.68480731 |
| H | -1.03495717 | -2.04897457 | -0.59859468 |
| H | -2.77143712 | 1.14946492  | 1.52941419  |
| C | 0.11807983  | 0.21553796  | -0.29146993 |
| C | 1.45851506  | 0.63571339  | -0.03871410 |
| C | 2.66505186  | -0.22639707 | 0.10328777  |
| C | 3.88962331  | 0.64969560  | 0.38162284  |
| H | 3.77683717  | 1.20626197  | 1.31370773  |
| H | 4.77023643  | 0.01102264  | 0.46807090  |
| H | 4.06009728  | 1.36120504  | -0.42833907 |
| C | 2.82230715  | -1.01501849 | -1.21849941 |
| H | 3.67298923  | -1.69097112 | -1.11557490 |
| H | 1.93840603  | -1.61895196 | -1.43794018 |
| H | 3.00967462  | -0.34587326 | -2.05998210 |
| C | 2.39075485  | -1.20661473 | 1.26873674  |
| H | 3.25358875  | -1.86656664 | 1.37278551  |
| H | 2.24531176  | -0.67391414 | 2.21017651  |
| H | 1.51362245  | -1.82972598 | 1.07657700  |
| O | 1.32570917  | 1.85262296  | 0.02803912  |

### TS34

|   |             |             |             |
|---|-------------|-------------|-------------|
| C | -3.19467374 | -1.13500384 | 0.50227798  |
| C | -3.68039090 | 0.30575971  | 0.33144529  |
| C | -2.54887451 | 1.33284503  | 0.43914551  |
| C | -1.47615901 | 1.17635021  | -0.62905815 |
| C | -1.02374698 | -0.54692864 | -0.49628584 |
| C | -2.11262084 | -1.51184978 | -0.53622920 |
| H | -2.94649870 | 2.34383104  | 0.31005955  |
| H | -4.17867475 | 0.41603938  | -0.63782768 |
| H | -4.42864437 | 0.52483318  | 1.09536410  |

|   |             |             |             |
|---|-------------|-------------|-------------|
| H | -2.78527000 | -1.28033182 | 1.50542997  |
| H | -4.02246186 | -1.83474039 | 0.38196212  |
| H | -1.81564887 | 1.15943660  | -1.66354089 |
| H | -0.70642818 | 1.95635625  | -0.54512232 |
| H | -2.53016297 | -1.51671633 | -1.54821976 |
| H | -1.68677152 | -2.49826212 | -0.34156729 |
| H | -2.08087697 | 1.30181870  | 1.42671806  |
| C | 0.01040857  | 0.11004560  | -0.34507127 |
| C | 1.34190470  | 0.72215954  | -0.12212308 |
| C | 2.46301975  | -0.27427535 | 0.13190906  |
| C | 3.75863895  | 0.49869288  | 0.39819373  |
| H | 3.66586427  | 1.13569760  | 1.27941846  |
| H | 4.56769489  | -0.21387509 | 0.56968945  |
| H | 4.02648675  | 1.12757958  | -0.45223647 |
| C | 2.61070097  | -1.16395094 | -1.12340593 |
| H | 3.42778933  | -1.86816208 | -0.95544136 |
| H | 1.70736350  | -1.74279307 | -1.32735151 |
| H | 2.84919107  | -0.56584547 | -2.00522645 |
| C | 2.08442850  | -1.14106223 | 1.35333601  |
| H | 2.90141383  | -1.83654552 | 1.55422938  |
| H | 1.93156065  | -0.52721753 | 2.24352286  |
| H | 1.18172267  | -1.72988798 | 1.17646593  |
| O | 1.43979578  | 1.92592490  | -0.15401128 |

### 35

|   |             |             |             |
|---|-------------|-------------|-------------|
| C | -2.64266071 | -1.34024723 | 0.46010867  |
| C | -3.41080063 | -0.21951690 | -0.26225555 |
| C | -3.06126441 | 1.19346160  | 0.21058759  |
| C | -1.68414984 | 1.80465172  | -0.28742726 |
| C | -0.74269185 | 0.74887837  | -0.15791789 |
| C | -1.22586172 | -1.61890774 | -0.03079303 |
| H | -3.79515930 | 1.90816261  | -0.16632576 |
| H | -3.29032644 | -0.30332972 | -1.34793309 |
| H | -4.47532923 | -0.35854203 | -0.06119867 |
| H | -2.61873415 | -1.12635165 | 1.53341122  |
| H | -3.19324421 | -2.27689290 | 0.34523428  |
| H | -1.75968228 | 2.12433767  | -1.32978560 |
| H | -1.44481199 | 2.66000027  | 0.34728300  |
| H | -1.23163155 | -2.01648504 | -1.05027468 |
| H | -0.73379088 | -2.35590407 | 0.60649857  |
| H | -3.06939953 | 1.23708793  | 1.30049595  |
| C | -0.25466339 | -0.42521364 | -0.09339466 |
| C | 1.24632194  | -0.80266423 | -0.21202488 |
| C | 2.26562188  | 0.30072912  | 0.07387868  |
| C | 2.32171846  | 0.45604560  | 1.61262777  |
| H | 2.61382660  | -0.48111476 | 2.08952316  |
| H | 3.06689321  | 1.21471593  | 1.85974850  |
| H | 1.36146031  | 0.77396787  | 2.02430111  |
| C | 1.81417889  | 1.60077756  | -0.57300390 |
| H | 0.80071721  | 1.88866252  | -0.22942859 |
| H | 2.44051304  | 2.43322285  | -0.24593793 |
| H | 1.80676462  | 1.55280893  | -1.66208814 |
| C | 3.63203836  | -0.13655497 | -0.47506691 |
| H | 4.37456705  | 0.62970013  | -0.24633181 |
| H | 3.94727330  | -1.07508374 | -0.01855571 |
| H | 3.59652639  | -0.27362632 | -1.55733263 |
| O | 1.50790786  | -1.94206375 | -0.46616882 |

**TS36**

|   |             |             |             |
|---|-------------|-------------|-------------|
| C | -2.63506441 | -1.36221722 | 0.44998933  |
| C | -3.41456222 | -0.23468029 | -0.24878104 |
| C | -3.06804196 | 1.17205018  | 0.24434081  |
| C | -1.70195438 | 1.79587896  | -0.25694353 |
| C | -0.74074641 | 0.75078184  | -0.14830996 |
| C | -1.22085065 | -1.62502083 | -0.05663679 |
| H | -3.81115367 | 1.88845684  | -0.11103571 |
| H | -3.30053573 | -0.30062091 | -1.33648534 |
| H | -4.47691879 | -0.38315785 | -0.04300084 |
| H | -2.60340866 | -1.16462267 | 1.52627006  |
| H | -3.18151925 | -2.30006466 | 0.32526893  |
| H | -1.78704939 | 2.12629503  | -1.29544967 |
| H | -1.46393805 | 2.64839538  | 0.38202515  |
| H | -1.23346294 | -2.00446222 | -1.08311402 |
| H | -0.72163197 | -2.37295754 | 0.56213639  |
| H | -3.06614014 | 1.19637828  | 1.33509131  |
| C | -0.25618357 | -0.42769589 | -0.10374569 |
| C | 1.24423780  | -0.79555437 | -0.22967185 |
| C | 2.25505762  | 0.31481800  | 0.06446469  |
| C | 2.33022452  | 0.43637667  | 1.60554901  |
| H | 2.63849635  | -0.50839408 | 2.05638901  |
| H | 3.07014296  | 1.19753471  | 1.86040175  |
| H | 1.37172763  | 0.73355765  | 2.03654781  |
| C | 1.77496568  | 1.61871542  | -0.54688823 |
| H | 0.74135328  | 1.85562161  | -0.20921527 |
| H | 2.35618990  | 2.46642966  | -0.17880373 |
| H | 1.77951528  | 1.60806355  | -1.63671156 |
| C | 3.61872255  | -0.09184604 | -0.51439072 |
| H | 4.35391302  | 0.68082188  | -0.28379412 |
| H | 3.95349385  | -1.03363996 | -0.07904646 |
| H | 3.56756698  | -0.21065071 | -1.59815106 |
| O | 1.51677475  | -1.93031337 | -0.49341065 |

**37**

|   |             |             |             |
|---|-------------|-------------|-------------|
| C | -2.60808002 | -1.36443102 | 0.36859678  |
| C | -3.44759185 | -0.17975475 | -0.12634500 |
| C | -2.96890537 | 1.19657144  | 0.34290346  |
| C | -1.67947030 | 1.71738023  | -0.32607474 |
| C | -0.51955808 | 0.82519160  | -0.08825729 |
| C | -1.25255992 | -1.55741417 | -0.31720521 |
| H | -3.73834248 | 1.94136180  | 0.12426046  |
| H | -3.50822834 | -0.19882259 | -1.22128204 |
| H | -4.46944266 | -0.31406994 | 0.23818566  |
| H | -2.45571382 | -1.27969629 | 1.45002188  |
| H | -3.17417624 | -2.28524579 | 0.20715420  |
| H | -1.82358147 | 1.79726488  | -1.41053883 |
| H | -1.46015177 | 2.72030704  | 0.04267672  |
| H | -1.39529880 | -1.66458554 | -1.40079411 |
| H | -0.78534963 | -2.48305187 | 0.02303491  |
| H | -2.83086829 | 1.19168241  | 1.42816926  |
| C | -0.23614277 | -0.46450027 | -0.12867434 |
| C | 1.21604991  | -0.85987853 | -0.03500541 |
| C | 2.21920034  | 0.31803250  | 0.04732929  |
| C | 2.75594197  | 0.38306906  | 1.49131495  |
| H | 3.22138383  | -0.56687482 | 1.75408884  |

|   |            |             |             |
|---|------------|-------------|-------------|
| H | 3.50535949 | 1.17251410  | 1.56962693  |
| H | 1.95774911 | 0.58644658  | 2.20865756  |
| C | 1.50294738 | 1.56857883  | -0.33817581 |
| H | 1.74494327 | 2.48809837  | 0.19782601  |
| H | 1.30011399 | 1.73747190  | -1.39030798 |
| C | 3.35938002 | 0.05011411  | -0.96037663 |
| H | 4.10752541 | 0.84127004  | -0.89788620 |
| H | 3.82696441 | -0.90136917 | -0.70572682 |
| H | 2.98545333 | -0.00540875 | -1.98393334 |
| O | 1.56775957 | -2.00957569 | -0.02299371 |
| H | 0.40443279 | 1.50474530  | 0.34990654  |

**TS38**

|   |             |             |             |
|---|-------------|-------------|-------------|
| C | 2.59485655  | 1.36915688  | 0.33259494  |
| C | 3.44132011  | 0.16259601  | -0.09081445 |
| C | 2.92436709  | -1.20334750 | 0.37171172  |
| C | 1.64033355  | -1.68783010 | -0.32846070 |
| C | 0.45422896  | -0.83304701 | -0.02834533 |
| C | 1.25060055  | 1.53059527  | -0.39269617 |
| H | 3.68924192  | -1.95846636 | 0.17411059  |
| H | 3.55583489  | 0.15995853  | -1.18163446 |
| H | 4.44547569  | 0.29535317  | 0.32089041  |
| H | 2.41609929  | 1.33595150  | 1.41259324  |
| H | 3.16644952  | 2.28048668  | 0.14077066  |
| H | 1.79095745  | -1.68629846 | -1.41482078 |
| H | 1.42855994  | -2.71789937 | -0.03701722 |
| H | 1.41635849  | 1.52958647  | -1.48002971 |
| H | 0.80184540  | 2.49658799  | -0.15509518 |
| H | 2.76272726  | -1.19434949 | 1.45424866  |
| C | 0.22462945  | 0.48483350  | -0.11774019 |
| C | -1.22110935 | 0.88468650  | 0.02618199  |
| C | -2.19161520 | -0.31471126 | 0.02654794  |
| C | -2.87354470 | -0.41105086 | 1.40382541  |
| H | -3.38239716 | 0.52683012  | 1.62602940  |
| H | -3.61137160 | -1.21514029 | 1.39680455  |
| H | -2.15142791 | -0.60688309 | 2.20038293  |
| C | -1.37779417 | -1.53645891 | -0.29202197 |
| H | -0.31861855 | -1.38232320 | 0.64358018  |
| H | -1.57963909 | -2.44672176 | 0.27389202  |
| H | -1.15897109 | -1.75572183 | -1.33182086 |
| C | -3.23129704 | -0.08312004 | -1.09424010 |
| H | -3.93920003 | -0.91255477 | -1.12617616 |
| H | -3.77365349 | 0.83764326  | -0.87648945 |
| H | -2.75397839 | 0.01514739  | -2.07092013 |
| O | -1.57965834 | 2.03131004  | 0.10031021  |

**39**

|   |            |             |             |
|---|------------|-------------|-------------|
| C | 2.61741793 | 1.32344164  | 0.40338607  |
| C | 3.37864979 | 0.14232773  | -0.20253052 |
| C | 2.86829912 | -1.24291680 | 0.20386628  |
| C | 1.51913887 | -1.64469434 | -0.39245491 |
| C | 0.29428368 | -0.85644587 | 0.08783509  |
| C | 1.20881279 | 1.58002106  | -0.14975396 |
| H | 3.59813511 | -1.99021742 | -0.11802770 |
| H | 3.38253706 | 0.22860934  | -1.29532733 |
| H | 4.42129387 | 0.22978459  | 0.11342832  |
| H | 2.53333122 | 1.20086769  | 1.48847776  |

|   |             |             |             |
|---|-------------|-------------|-------------|
| H | 3.18178577  | 2.24250848  | 0.23647415  |
| H | 1.54582918  | -1.55959662 | -1.48399861 |
| H | 1.31618151  | -2.69308008 | -0.16405270 |
| H | 1.26295458  | 1.64785117  | -1.26734166 |
| H | 0.79187725  | 2.54961977  | 0.13790061  |
| H | 2.82311599  | -1.31182777 | 1.29699431  |
| C | 0.19388562  | 0.56942939  | -0.05103109 |
| C | -1.30554180 | 0.94143886  | -0.10437919 |
| C | -2.12607712 | -0.32807099 | 0.03120641  |
| C | -2.63540653 | -0.39351404 | 1.49384066  |
| H | -3.27726590 | 0.46143477  | 1.71113774  |
| H | -3.21411995 | -1.31011916 | 1.62027196  |
| H | -1.81858903 | -0.40388159 | 2.21936414  |
| C | -1.09643572 | -1.44314814 | -0.25011526 |
| H | -1.29116829 | -2.34706815 | 0.32463620  |
| H | -1.09939281 | -1.71105612 | -1.30925231 |
| C | -3.31047102 | -0.32534478 | -0.94274741 |
| H | -3.87149695 | -1.25576141 | -0.83599295 |
| H | -3.97937175 | 0.50952375  | -0.72865726 |
| H | -2.97059251 | -0.24347816 | -1.97712305 |
| O | -1.67008294 | 2.07783141  | -0.25304232 |
| H | 0.35659299  | -0.80268921 | 1.21831955  |

#### TS40

|   |             |             |             |
|---|-------------|-------------|-------------|
| C | 2.50542144  | -1.51423151 | -0.44846383 |
| C | 3.27496905  | -0.31540695 | 0.09126041  |
| C | 2.65406795  | 1.01283397  | -0.37615218 |
| C | 1.13479371  | 2.24350751  | 0.31482982  |
| C | 1.08021901  | 0.89473331  | 0.06055959  |
| C | 1.10241739  | -1.59451998 | 0.15435049  |
| H | 3.21973798  | 1.83055369  | 0.08613988  |
| H | 3.33320332  | -0.33711242 | 1.18183377  |
| H | 4.29957916  | -0.29460217 | -0.29131348 |
| H | 2.43910297  | -1.44386392 | -1.53795488 |
| H | 3.04921869  | -2.43248005 | -0.21953016 |
| H | 1.21781596  | 2.62325793  | 1.33210268  |
| H | 1.22083085  | 2.96371364  | -0.49435615 |
| H | 1.13778919  | -2.00090711 | 1.17189291  |
| H | 0.46662566  | -2.27175294 | -0.42007512 |
| H | 2.64961938  | 1.16855766  | -1.45403120 |
| C | 0.44401075  | -0.24682364 | 0.26417980  |
| C | -1.00727085 | -0.24237500 | 0.72766241  |
| O | -1.18742916 | -0.45992928 | 1.90494864  |
| C | -2.12142866 | -0.00962217 | -0.28518374 |
| C | -3.47194369 | -0.35114166 | 0.35491895  |
| H | -3.66736354 | 0.27446145  | 1.22718278  |
| H | -4.26816585 | -0.18650911 | -0.37407104 |
| H | -3.50557909 | -1.39550381 | 0.67141702  |
| C | -1.87652183 | -0.88382958 | -1.53140747 |
| H | -0.91480415 | -0.66405322 | -2.00146517 |
| H | -1.91249715 | -1.94763982 | -1.28538862 |
| H | -2.65882679 | -0.68196803 | -2.26616480 |
| C | -2.09625628 | 1.48310831  | -0.69424762 |
| H | -2.16733041 | 2.13867901  | 0.17736762  |
| H | -1.19930679 | 1.73452946  | -1.26192830 |
| H | -2.95724222 | 1.68167242  | -1.33633802 |

## 41

|   |             |             |             |
|---|-------------|-------------|-------------|
| C | 2.76879976  | 0.96825321  | -0.22194173 |
| C | 3.17049895  | -0.43796304 | -0.67053870 |
| C | 2.60964762  | -1.48152883 | 0.29373923  |
| C | 1.08220329  | -1.41337736 | 0.32692300  |
| C | 0.50299419  | -0.05927279 | 0.31929566  |
| C | 1.28516261  | 1.09429447  | 0.06386058  |
| H | 2.90709903  | -2.48940775 | 0.00203755  |
| H | 2.79273298  | -0.62816357 | -1.68072879 |
| H | 4.25805936  | -0.50647588 | -0.71781439 |
| H | 3.30690792  | 1.22944664  | 0.69537461  |
| H | 3.04370772  | 1.71196504  | -0.97211479 |
| H | 0.65607731  | -1.90019193 | -0.57035215 |
| H | 0.64035118  | -1.98120757 | 1.15446279  |
| H | 2.99870884  | -1.30889247 | 1.30120960  |
| C | -0.95911485 | 0.04902975  | 0.69583063  |
| O | -1.11914287 | 0.24199165  | 1.88249085  |
| C | 0.66999265  | 2.31294204  | 0.10112183  |
| H | -0.37936341 | 2.43439855  | 0.33810122  |
| H | 1.23163910  | 3.22145156  | -0.08675420 |
| C | -2.06777000 | -0.15245543 | -0.32131436 |
| C | -2.39944622 | -1.66902906 | -0.31267220 |
| H | -3.24602531 | -1.83604351 | -0.98159728 |
| H | -1.56960712 | -2.28082678 | -0.67112907 |
| H | -2.67580423 | -2.00358724 | 0.68846964  |
| C | -3.30107135 | 0.64532519  | 0.13156487  |
| H | -4.11527635 | 0.47095969  | -0.57433016 |
| H | -3.62981811 | 0.33652763  | 1.12391718  |
| H | -3.09422689 | 1.71773510  | 0.15426175  |
| C | -1.62661449 | 0.27662452  | -1.73109773 |
| H | -1.43476221 | 1.35002414  | -1.78712933 |
| H | -0.73090259 | -0.24993543 | -2.07107258 |
| H | -2.42620653 | 0.04508347  | -2.43679652 |

## 42

|   |             |             |             |
|---|-------------|-------------|-------------|
| C | 2.36373507  | -1.55955420 | -0.41335905 |
| C | 3.46746409  | -0.50361842 | -0.40463341 |
| C | 2.88961626  | 0.90510941  | -0.52936289 |
| C | 1.81632282  | 1.17412483  | 0.56508812  |
| C | 0.77863207  | 0.10790758  | 0.49740569  |
| C | 1.29287453  | -1.27521033 | 0.68197209  |
| H | 3.66584192  | 1.66505377  | -0.42492208 |
| H | 4.04427778  | -0.58264061 | 0.52320852  |
| H | 4.16141300  | -0.68854888 | -1.22870155 |
| H | 1.86989605  | -1.58829838 | -1.38905340 |
| H | 2.76612487  | -2.55649010 | -0.22607708 |
| H | 2.29563534  | 1.10284421  | 1.54659729  |
| H | 1.41478610  | 2.18045848  | 0.46413789  |
| H | 1.78890614  | -1.30353626 | 1.65886240  |
| H | 0.50597241  | -2.01943407 | 0.66203943  |
| H | 2.43043327  | 1.04203165  | -1.51286746 |
| C | -0.53680253 | 0.36753856  | 0.19735210  |
| C | -1.69650429 | -0.58224721 | 0.04876733  |
| C | -4.03805819 | -0.67462029 | -0.30370331 |
| H | -4.82251919 | 0.06408370  | -0.43243818 |
| H | -3.94803396 | -1.30880631 | -1.18380262 |
| H | -4.20964126 | -1.27837135 | 0.58551961  |



|   |             |             |             |
|---|-------------|-------------|-------------|
| O | -1.58816877 | -1.77872698 | 0.09623305  |
| N | -0.88894410 | 1.68491140  | 0.01224437  |
| N | -1.21957979 | 2.72786484  | -0.14798874 |
| O | -2.81848267 | 0.10020094  | -0.13677111 |

**TS43**

|   |             |             |             |
|---|-------------|-------------|-------------|
| C | -2.59730290 | -1.46861306 | 0.44240355  |
| C | -3.58241805 | -0.30180643 | 0.37341923  |
| C | -2.86124761 | 1.04124343  | 0.50669558  |
| C | -1.74622629 | 1.19560353  | -0.54433366 |
| C | -0.80741231 | 0.02235671  | -0.46778615 |
| C | -1.48642180 | -1.35809419 | -0.61300355 |
| H | -3.55830174 | 1.87155150  | 0.37555871  |
| H | -4.12376535 | -0.33530702 | -0.57835571 |
| H | -4.32671297 | -0.39985486 | 1.16674321  |
| H | -2.14233352 | -1.52619591 | 1.43599332  |
| H | -3.10787532 | -2.41985757 | 0.26942466  |
| H | -2.17854457 | 1.18120184  | -1.55000543 |
| H | -1.20602573 | 2.13054372  | -0.41942230 |
| H | -1.90185332 | -1.35722698 | -1.62610921 |
| H | -0.76465032 | -2.16451235 | -0.53210077 |
| H | -2.42539472 | 1.13993092  | 1.50561047  |
| C | 0.46603916  | -0.00606533 | -0.24749119 |
| C | 1.71117058  | -0.74221249 | -0.06115069 |
| C | 4.02730054  | -0.77466018 | 0.35802208  |
| H | 3.93348924  | -1.42567911 | 1.22483755  |
| H | 4.23696161  | -1.35224815 | -0.53995482 |
| H | 4.77953012  | -0.01020792 | 0.51946090  |
| O | 1.60003855  | -1.94440778 | -0.14879798 |
| N | 1.12296489  | 1.99809740  | -0.05222837 |
| N | 1.58895560  | 2.98287033  | 0.04949437  |
| O | 2.78113823  | -0.03240302 | 0.17496320  |

**TS44**

|   |             |             |             |
|---|-------------|-------------|-------------|
| C | -2.87124952 | -1.00574892 | 0.52844285  |
| C | -3.18401485 | 0.47503791  | 0.30716410  |
| C | -1.94328607 | 1.36547983  | 0.41806542  |
| C | -0.87392239 | 1.05590378  | -0.61795064 |
| C | -0.62414331 | -0.69570080 | -0.43437642 |
| C | -1.81999696 | -1.52880058 | -0.47564587 |
| H | -2.21404498 | 2.41185622  | 0.24529035  |
| H | -3.63980852 | 0.61196955  | -0.67930069 |
| H | -3.92016549 | 0.80298801  | 1.04321968  |
| H | -2.50199691 | -1.16916703 | 1.54417294  |
| H | -3.77111486 | -1.60955822 | 0.40636582  |
| H | -1.18990850 | 1.04884498  | -1.65985032 |
| H | -0.01682227 | 1.73322502  | -0.53297740 |
| H | -2.21636930 | -1.50808820 | -1.49591893 |
| H | -1.51272382 | -2.55215174 | -0.25175222 |
| H | -1.50679977 | 1.31493172  | 1.41906587  |
| C | 0.49485201  | -0.20358612 | -0.27913188 |
| C | 1.87685607  | 0.25931285  | -0.07880674 |
| C | 4.06001551  | -0.51631371 | 0.37688768  |
| H | 4.49998367  | -1.49102285 | 0.55918887  |
| H | 4.48268390  | -0.05244706 | -0.51234556 |
| H | 4.17130245  | 0.13565249  | 1.24113203  |
| O | 2.18707319  | 1.42138219  | -0.12974626 |

|             |             |             |             |
|-------------|-------------|-------------|-------------|
| O           | 2.64273173  | -0.78614630 | 0.15289234  |
| <b>45</b>   |             |             |             |
| C           | 2.18364337  | -1.38844803 | -0.29337747 |
| C           | 2.88089119  | -0.21565373 | 0.41946585  |
| C           | 2.63755473  | 1.15797479  | -0.20960457 |
| C           | 1.20880652  | 1.93321840  | 0.04179574  |
| C           | 0.37853699  | 0.82878223  | -0.04002556 |
| C           | 0.70659352  | -1.58594783 | 0.04488924  |
| H           | 3.31776598  | 1.89398509  | 0.22074812  |
| H           | 2.64045221  | -0.20261264 | 1.48715452  |
| H           | 3.95984987  | -0.37408658 | 0.35324709  |
| H           | 2.29551681  | -1.26826495 | -1.37535826 |
| H           | 2.69531857  | -2.31573617 | -0.02961634 |
| H           | 1.20889234  | 2.39990834  | 1.02744555  |
| H           | 1.09916793  | 2.65593213  | -0.76687874 |
| H           | 0.58408115  | -1.96035592 | 1.06629187  |
| H           | 0.24192481  | -2.30870846 | -0.62889151 |
| H           | 2.77146542  | 1.12052674  | -1.28875233 |
| C           | -0.15754351 | -0.33194275 | -0.02526609 |
| C           | -1.66782697 | -0.46389487 | 0.00463120  |
| C           | -3.68845798 | 0.77995898  | 0.00504047  |
| H           | -4.05545007 | 0.31711427  | 0.91944670  |
| H           | -3.93547405 | 1.83652685  | -0.02292896 |
| H           | -4.08114713 | 0.26396578  | -0.86940517 |
| O           | -2.22085270 | -1.52703900 | 0.03965093  |
| O           | -2.23385298 | 0.73648234  | -0.01496227 |
| <b>TS46</b> |             |             |             |
| C           | 1.96546834  | -1.44841648 | -0.28014677 |
| C           | 2.74869522  | -0.30414515 | 0.38394136  |
| C           | 2.52031197  | 1.06278814  | -0.25978328 |
| C           | 1.15313524  | 1.79060098  | 0.06069125  |
| C           | 0.12680529  | 0.80531087  | -0.06649362 |
| C           | 0.50395886  | -1.59667464 | 0.12870523  |
| H           | 3.26387049  | 1.77814467  | 0.09700356  |
| H           | 2.54413915  | -0.26326232 | 1.45948546  |
| H           | 3.81431956  | -0.52158924 | 0.28329564  |
| H           | 2.02876789  | -1.34608561 | -1.36818685 |
| H           | 2.44469118  | -2.39795345 | -0.03159676 |
| H           | 1.15918914  | 2.18601587  | 1.08029090  |
| H           | 1.03461775  | 2.60993312  | -0.65026219 |
| H           | 0.41829277  | -1.88185006 | 1.18250603  |
| H           | 0.01569968  | -2.37366292 | -0.46185624 |
| H           | 2.61315163  | 0.98817847  | -1.34403498 |
| C           | -0.40143820 | -0.36445484 | -0.01427614 |
| C           | -1.89599617 | -0.65534591 | -0.01719108 |
| C           | -2.21333054 | 1.70911941  | 0.08457758  |
| H           | -1.21387404 | 1.79319637  | -0.43138497 |
| H           | -2.84925281 | 2.39088439  | -0.47765777 |
| H           | -2.12098126 | 1.98762914  | 1.13220191  |
| O           | -2.31055370 | -1.77471340 | 0.00443654  |
| O           | -2.71560444 | 0.40654959  | -0.07163581 |
| <b>47</b>   |             |             |             |
| C           | 1.98538677  | -1.36761825 | -0.48213903 |
| C           | 3.01767446  | -0.24852968 | -0.31548980 |

|   |             |             |             |
|---|-------------|-------------|-------------|
| C | 2.49126771  | 1.17740925  | -0.49587459 |
| C | 1.45717850  | 1.62890340  | 0.56824060  |
| C | 0.09858437  | 1.06621958  | 0.35930881  |
| C | 0.86711021  | -1.36902581 | 0.57145130  |
| H | 3.33111566  | 1.87296974  | -0.43061809 |
| H | 3.47766055  | -0.33497656 | 0.67608452  |
| H | 3.82031353  | -0.41024055 | -1.04075676 |
| H | 1.54124431  | -1.32973618 | -1.48215712 |
| H | 2.50084395  | -2.32875954 | -0.40581147 |
| H | 1.81772901  | 1.31443033  | 1.55734287  |
| H | 1.38994906  | 2.71598493  | 0.58020152  |
| H | 1.28585468  | -1.23195662 | 1.57406079  |
| H | 0.36740366  | -2.33764156 | 0.57443105  |
| H | 2.05916323  | 1.30055652  | -1.49375055 |
| C | -0.16808611 | -0.26436554 | 0.35309234  |
| C | -1.46092092 | -0.76256018 | 0.13553441  |
| C | -3.81825866 | 0.67245517  | -0.38434138 |
| H | -4.55576372 | 1.46304053  | -0.56253210 |
| H | -4.15242338 | -0.37567533 | -0.40106275 |
| O | -2.21539973 | -1.61631341 | 0.03256014  |
| H | -0.71707204 | 1.75462855  | 0.19315623  |
| O | -2.65660410 | 0.95787323  | -0.17238394 |

#### TS48

|   |             |             |             |
|---|-------------|-------------|-------------|
| C | 1.80019271  | -1.50686107 | -0.14979162 |
| C | 2.82934919  | -0.39582991 | 0.07953161  |
| C | 2.45075692  | 0.98233888  | -0.46803280 |
| C | 1.22070666  | 1.62290347  | 0.21872884  |
| C | -0.07011494 | 1.00060003  | -0.21241392 |
| C | 0.46853172  | -1.33812347 | 0.60893565  |
| H | 3.28932753  | 1.66609024  | -0.31727767 |
| H | 3.03155234  | -0.31131356 | 1.15391318  |
| H | 3.77002143  | -0.70225747 | -0.38633845 |
| H | 1.59031101  | -1.61469564 | -1.21847498 |
| H | 2.22981291  | -2.45491130 | 0.18162745  |
| H | 1.32562477  | 1.51995049  | 1.30411718  |
| H | 1.18600824  | 2.68740017  | -0.01171353 |
| H | 0.67752564  | -1.06780733 | 1.65575073  |
| H | -0.07559252 | -2.28196201 | 0.64010597  |
| H | 2.28006007  | 0.92824796  | -1.54790114 |
| C | -0.43941534 | -0.28772565 | 0.06871886  |
| C | -1.86076218 | -0.66804601 | -0.15733526 |
| C | -2.14101304 | 1.53752556  | 0.41080370  |
| H | -0.61124470 | 1.54552975  | -0.98876393 |
| H | -2.34319533 | 2.52444013  | 0.00847975  |
| H | -1.88816250 | 1.42110316  | 1.45804420  |
| O | -2.36447231 | -1.73098518 | -0.26179652 |
| O | -2.63890928 | 0.53864275  | -0.26655231 |

#### 49

|   |             |             |             |
|---|-------------|-------------|-------------|
| C | 1.81366983  | -1.53750559 | -0.36165794 |
| C | 2.70114383  | -0.47115872 | 0.28877167  |
| C | 2.43652809  | 0.97354199  | -0.14767543 |
| C | 1.11798968  | 1.57538139  | 0.33600222  |
| C | -0.15397581 | 0.95076373  | -0.27735891 |
| C | 0.35476023  | -1.57759103 | 0.10403360  |
| H | 3.23776641  | 1.60522465  | 0.24383922  |

|   |             |             |             |
|---|-------------|-------------|-------------|
| H | 2.62487287  | -0.54554440 | 1.37942730  |
| H | 3.73672132  | -0.71530365 | 0.03994533  |
| H | 1.81660985  | -1.42408549 | -1.45136718 |
| H | 2.22785200  | -2.52516804 | -0.15328767 |
| H | 1.02971348  | 1.49533367  | 1.42307227  |
| H | 1.08323793  | 2.63734868  | 0.08580754  |
| H | 0.31916102  | -1.66030048 | 1.22440825  |
| H | -0.19754640 | -2.47403713 | -0.20076910 |
| H | 2.49542801  | 1.04762605  | -1.23912957 |
| C | -0.48194104 | -0.42778645 | -0.04673762 |
| C | -2.00164592 | -0.53984621 | 0.03445425  |
| C | -1.47342696 | 1.70925429  | -0.06863181 |
| H | -1.71498087 | 2.39545738  | -0.87596280 |
| H | -1.48339226 | 2.23479039  | 0.88618142  |
| O | -2.62615819 | -1.55588729 | 0.13298173  |
| H | 0.02477794  | 0.87916848  | -1.38346550 |
| O | -2.50753906 | 0.69443579  | -0.02752827 |

### TS50

|   |             |             |             |
|---|-------------|-------------|-------------|
| C | 2.31679860  | -1.36045059 | -0.21087238 |
| C | 2.77904233  | -0.07776518 | 0.47851197  |
| C | 2.27462352  | 1.18555079  | -0.23376930 |
| C | 0.72837092  | 2.16291216  | 0.04438011  |
| C | 0.46469241  | 0.85136927  | -0.09785969 |
| C | 0.82078776  | -1.61736679 | -0.04620330 |
| H | 2.76826198  | 2.05553491  | 0.20280426  |
| H | 2.50506087  | -0.05593212 | 1.53623508  |
| H | 3.86819519  | -0.00003140 | 0.42960061  |
| H | 2.57094828  | -1.30052081 | -1.27297861 |
| H | 2.86947953  | -2.20749460 | 0.19801538  |
| H | 0.75720390  | 2.60308791  | 1.03711911  |
| H | 0.72156612  | 2.83814824  | -0.80519183 |
| H | 0.61038473  | -2.09117363 | 0.91847989  |
| H | 0.44686841  | -2.30439688 | -0.80748794 |
| H | 2.40907523  | 1.18020574  | -1.31109169 |
| C | -0.00973185 | -0.36488480 | -0.08098390 |
| C | -1.50885486 | -0.52370021 | -0.00568387 |
| C | -3.58903297 | 0.60270226  | 0.04309965  |
| H | -3.98812822 | 0.03756201  | -0.79800752 |
| H | -3.89334539 | 0.14351932  | 0.98268042  |
| H | -3.90611600 | 1.64015304  | -0.00181979 |
| O | -2.03360293 | -1.60619348 | 0.07757729  |
| O | -2.14146356 | 0.64600684  | -0.03739894 |

### 51

|   |            |             |             |
|---|------------|-------------|-------------|
| C | 2.07622927 | -1.82055041 | -0.09421989 |
| C | 3.35818160 | -1.02529142 | -0.34238522 |
| C | 3.05078478 | 0.42113143  | -0.73075640 |
| C | 2.15842778 | 1.11047350  | 0.33623492  |
| C | 0.93705295 | 0.28952707  | 0.56062953  |
| C | 1.16825460 | -1.12775503 | 0.95760842  |
| H | 3.96643570 | 1.00587157  | -0.83397203 |
| H | 3.97875124 | -1.03677250 | 0.56007901  |
| H | 3.93990776 | -1.50328935 | -1.13461834 |
| H | 1.51473526 | -1.92978550 | -1.02694566 |
| H | 2.29936398 | -2.82631731 | 0.26621695  |
| H | 2.70879916 | 1.14257313  | 1.28327784  |

|   |             |             |             |
|---|-------------|-------------|-------------|
| H | 1.93362346  | 2.13713975  | 0.04934927  |
| H | 1.69225212  | -1.11442252 | 1.92033151  |
| H | 0.23730344  | -1.67554315 | 1.09330412  |
| H | 2.53567378  | 0.45231053  | -1.69614938 |
| C | -0.33254848 | 0.73243340  | 0.33081996  |
| C | -1.63076765 | -0.03640541 | 0.63188631  |
| C | -1.81815344 | -0.51073421 | -1.81098054 |
| H | -1.77652202 | -1.53039896 | -2.19868382 |
| H | -2.51151785 | 0.07258801  | -2.42033635 |
| H | -0.82419967 | -0.07751448 | -1.88327101 |
| C | -3.53014253 | -1.27755003 | -0.19326825 |
| H | -4.26331452 | -0.96880612 | -0.93925620 |
| H | -3.35503436 | -2.35224449 | -0.28694880 |
| H | -3.89994933 | -1.05663871 | 0.80362984  |
| O | -1.96515832 | -0.13081838 | 1.80377809  |
| N | -0.52439878 | 2.02357899  | -0.05372235 |
| N | -0.77474357 | 3.06101961  | -0.35868091 |
| N | -2.28274837 | -0.54445300 | -0.42410462 |

**TS52**

|   |             |             |             |
|---|-------------|-------------|-------------|
| C | -2.64131222 | -1.57523197 | 0.46232889  |
| C | -3.69610091 | -0.47044987 | 0.53043245  |
| C | -3.04691771 | 0.90514561  | 0.70260840  |
| C | -2.02360963 | 1.19179859  | -0.41231351 |
| C | -1.02313090 | 0.07611792  | -0.49946650 |
| C | -1.61664478 | -1.32997085 | -0.65666488 |
| H | -3.80001229 | 1.69557379  | 0.68265112  |
| H | -4.29647281 | -0.48013033 | -0.38612974 |
| H | -4.37993838 | -0.66147713 | 1.36068536  |
| H | -2.11485119 | -1.65501428 | 1.41886131  |
| H | -3.10678517 | -2.54599514 | 0.27320212  |
| H | -2.53713410 | 1.23086999  | -1.37879488 |
| H | -1.52770003 | 2.14814154  | -0.25305064 |
| H | -2.10389410 | -1.32743578 | -1.63753177 |
| H | -0.84256878 | -2.09275325 | -0.67172401 |
| H | -2.54492022 | 0.96296420  | 1.67338704  |
| C | 0.27301325  | 0.11888418  | -0.40858044 |
| C | 1.53469673  | -0.65743633 | -0.44936120 |
| C | 3.77684126  | -1.07648023 | 0.31323103  |
| H | 3.91955106  | -1.37944052 | -0.72120970 |
| H | 4.57019353  | -0.39248310 | 0.61407010  |
| H | 3.80078760  | -1.96214655 | 0.95339070  |
| C | 2.28808237  | 0.39031661  | 1.66773819  |
| H | 2.87244031  | 1.31230138  | 1.63846514  |
| H | 1.23474401  | 0.62539754  | 1.80492420  |
| H | 2.61517467  | -0.20873228 | 2.51894817  |
| O | 1.56318727  | -1.52268997 | -1.32053339 |
| N | 0.83978408  | 1.97316213  | -0.41921068 |
| N | 1.35119926  | 2.90233311  | -0.69440808 |
| N | 2.49218084  | -0.38722903 | 0.44524218  |

**53**

|   |            |             |             |
|---|------------|-------------|-------------|
| C | 2.68203422 | 1.40049787  | 0.43733067  |
| C | 3.66518905 | 0.23280595  | 0.32633481  |
| C | 2.95506466 | -1.11427349 | 0.48701705  |
| C | 1.81152979 | -1.28355829 | -0.52907511 |
| C | 0.88852001 | -0.08644944 | -0.46024400 |

|   |             |             |             |
|---|-------------|-------------|-------------|
| C | 1.53926697  | 1.28551819  | -0.58688489 |
| H | 3.65576619  | -1.94066573 | 0.34747676  |
| H | 4.16662901  | 0.26918982  | -0.64746785 |
| H | 4.44277095  | 0.33288929  | 1.08721270  |
| H | 2.25610754  | 1.43771819  | 1.44506244  |
| H | 3.18956923  | 2.35317851  | 0.26783392  |
| H | 2.21673962  | -1.30069343 | -1.54715262 |
| H | 1.25269544  | -2.20277603 | -0.36663217 |
| H | 1.93445536  | 1.34155162  | -1.60692447 |
| H | 0.81213619  | 2.08705956  | -0.46397562 |
| H | 2.54917361  | -1.20491463 | 1.49960944  |
| C | -0.38478570 | -0.16105408 | -0.25339344 |
| C | -1.73012427 | -0.44620799 | -0.03813841 |
| C | -4.09932893 | -0.46463109 | 0.32151004  |
| H | -4.52732208 | -0.12064415 | 1.26354894  |
| H | -4.78405575 | -0.24201024 | -0.49724225 |
| H | -3.91697290 | -1.53562129 | 0.36869491  |
| C | -2.84337364 | 1.69829187  | 0.00978348  |
| H | -3.51262303 | 2.00607548  | -0.79382454 |
| H | -3.19315515 | 2.10725438  | 0.95788974  |
| H | -1.84055000 | 2.06799758  | -0.19713785 |
| O | -1.47300324 | -1.68613502 | -0.01428653 |
| N | -2.83085115 | 0.23530159  | 0.08959485  |

#### TS54

|   |             |             |             |
|---|-------------|-------------|-------------|
| C | 3.02850073  | 1.07970095  | 0.46049560  |
| C | 3.41365942  | -0.39652236 | 0.34365363  |
| C | 2.22092175  | -1.34474003 | 0.50991276  |
| C | 1.14647209  | -1.17544848 | -0.55033515 |
| C | 0.80164597  | 0.62216505  | -0.48500255 |
| C | 1.96162269  | 1.49255965  | -0.57959267 |
| H | 2.55750023  | -2.38230610 | 0.42290934  |
| H | 3.88784242  | -0.58030438 | -0.62699192 |
| H | 4.15910983  | -0.63179950 | 1.10557433  |
| H | 2.64413001  | 1.29236806  | 1.46158965  |
| H | 3.90138618  | 1.71447223  | 0.30333350  |
| H | 1.47912525  | -1.19578811 | -1.58631980 |
| H | 0.33426252  | -1.90921476 | -0.44351947 |
| H | 2.36090069  | 1.43236240  | -1.59696789 |
| H | 1.61435616  | 2.51622647  | -0.41747175 |
| H | 1.77058598  | -1.24281011 | 1.50108333  |
| C | -0.23673671 | -0.01220110 | -0.29283768 |
| C | -1.59347471 | -0.59033340 | -0.09741240 |
| C | -3.94257298 | -0.14613176 | 0.26199326  |
| H | -3.97747242 | -1.22556837 | 0.15173392  |
| H | -4.33584313 | 0.13833657  | 1.23988012  |
| H | -4.54611395 | 0.32419595  | -0.51764899 |
| C | -2.34156585 | 1.75406415  | 0.21216076  |
| H | -2.95424716 | 2.15732889  | 1.01844731  |
| H | -1.30235660 | 1.98532545  | 0.43420914  |
| H | -2.62943233 | 2.23078604  | -0.72780442 |
| O | -1.72509445 | -1.80757802 | -0.17678129 |
| N | -2.55689364 | 0.30929462  | 0.14429235  |

#### 55

|   |            |             |             |
|---|------------|-------------|-------------|
| C | 2.40276771 | -1.41088483 | -0.27323073 |
| C | 3.14863509 | -0.24962250 | 0.40746718  |

|   |             |             |             |
|---|-------------|-------------|-------------|
| C | 2.90450900  | 1.11683793  | -0.23355841 |
| C | 1.49786118  | 1.82056976  | 0.04204202  |
| C | 0.55871800  | 0.77019657  | -0.07324772 |
| C | 0.93773923  | -1.59092043 | 0.11086375  |
| H | 3.61210869  | 1.84933658  | 0.15805149  |
| H | 2.92543180  | -0.21791329 | 1.47933609  |
| H | 4.22083118  | -0.44050734 | 0.32354108  |
| H | 2.48270862  | -1.30388568 | -1.35973867 |
| H | 2.90066759  | -2.34886812 | -0.01779064 |
| H | 1.48124521  | 2.25110685  | 1.04570457  |
| H | 1.36789482  | 2.59814938  | -0.71233210 |
| H | 0.83941584  | -1.88870801 | 1.15949498  |
| H | 0.46189528  | -2.36165281 | -0.49891551 |
| H | 3.03236623  | 1.05482541  | -1.31434250 |
| C | 0.00330345  | -0.37483493 | -0.03372480 |
| C | -1.50249365 | -0.70929195 | -0.02823083 |
| C | -1.90275646 | 1.71891241  | 0.02372412  |
| H | -1.08553855 | 1.87702557  | -0.69525279 |
| H | -2.71210240 | 2.35798478  | -0.32845094 |
| H | -1.60699998 | 2.04382607  | 1.02402662  |
| C | -3.79106380 | 0.09591950  | 0.03565994  |
| H | -4.26034311 | 0.51287702  | -0.85754785 |
| H | -3.96637602 | -0.97487871 | 0.07512647  |
| H | -4.21576731 | 0.57033150  | 0.92223306  |
| O | -1.82256107 | -1.88402416 | -0.03699192 |
| N | -2.34518956 | 0.33930345  | -0.00391296 |

#### TS56

|   |             |             |             |
|---|-------------|-------------|-------------|
| C | 2.38261725  | -1.41314646 | -0.28219560 |
| C | 3.14046838  | -0.24044002 | 0.36154939  |
| C | 2.85991076  | 1.11809672  | -0.28325285 |
| C | 1.48580665  | 1.79828057  | 0.06370243  |
| C | 0.46553687  | 0.79276347  | -0.08359354 |
| C | 0.93031137  | -1.59597983 | 0.14803390  |
| H | 3.59811664  | 1.85059833  | 0.04981996  |
| H | 2.94770482  | -0.20072202 | 1.43966345  |
| H | 4.21086345  | -0.42742580 | 0.24906916  |
| H | 2.42865402  | -1.31755681 | -1.37197244 |
| H | 2.89456598  | -2.34547813 | -0.03301479 |
| H | 1.49258810  | 2.16611172  | 1.09372806  |
| H | 1.33959398  | 2.63873369  | -0.61639804 |
| H | 0.87125072  | -1.86867181 | 1.20788758  |
| H | 0.45482002  | -2.40159675 | -0.41496016 |
| H | 2.93533816  | 1.03800682  | -1.36923475 |
| C | -0.00746900 | -0.40273710 | -0.00129964 |
| C | -1.50207337 | -0.73458808 | 0.01186317  |
| C | -1.79337068 | 1.67307669  | 0.10912467  |
| H | -0.81894761 | 1.70209987  | -0.48016202 |
| H | -2.41217941 | 2.37888176  | -0.44758794 |
| H | -1.60065868 | 2.02899878  | 1.12135776  |
| O | -1.86387642 | -1.89412469 | -0.00966564 |
| N | -2.31730180 | 0.34802870  | 0.03570219  |
| C | -3.76914004 | 0.18089231  | -0.08585196 |
| H | -3.98857321 | -0.88311140 | -0.09613173 |
| H | -4.26502790 | 0.65014025  | 0.76462291  |
| H | -4.11988209 | 0.64032524  | -1.01228754 |

**57**

|   |             |             |             |
|---|-------------|-------------|-------------|
| C | -2.17386758 | 1.40773636  | -0.21962533 |
| C | -3.21657372 | 0.28601084  | -0.27925969 |
| C | -2.69541520 | -1.09239430 | -0.69839324 |
| C | -1.66627726 | -1.71687705 | 0.27425536  |
| C | -0.30054024 | -1.12007141 | 0.16040231  |
| C | -1.06265794 | 1.18971801  | 0.82298693  |
| H | -3.54257905 | -1.78045038 | -0.76142712 |
| H | -3.69356642 | 0.19707827  | 0.70474840  |
| H | -4.00657353 | 0.58151267  | -0.97649285 |
| H | -1.71905246 | 1.55378612  | -1.20538083 |
| H | -2.68720086 | 2.34102540  | 0.02793376  |
| H | -2.03044831 | -1.58353517 | 1.30110137  |
| H | -1.60004956 | -2.79033068 | 0.09472092  |
| H | -1.50986185 | 0.85173184  | 1.76477032  |
| H | -0.56729413 | 2.13739162  | 1.03111501  |
| H | -2.25826606 | -1.04185915 | -1.70115439 |
| C | -0.01954238 | 0.17874627  | 0.40313282  |
| C | 1.30310154  | 0.71677793  | 0.11909001  |
| C | 2.75082985  | -1.03693092 | 0.98439443  |
| H | 3.62533486  | -1.67448416 | 0.92746121  |
| H | 2.13387151  | -1.02728708 | 1.87449879  |
| C | 3.24491162  | -0.20124121 | -1.23746292 |
| H | 4.08678186  | -0.88434124 | -1.16650308 |
| H | 2.60193725  | -0.46602906 | -2.07636439 |
| H | 3.58685353  | 0.82596166  | -1.34669898 |
| O | 1.62242822  | 1.85935502  | -0.04580654 |
| H | 0.48274706  | -1.78081051 | -0.19243414 |
| N | 2.44628524  | -0.28847366 | -0.00171615 |

**TS58**

|   |             |             |             |
|---|-------------|-------------|-------------|
| C | -2.24599505 | 1.42587787  | -0.20874878 |
| C | -3.20381455 | 0.24239102  | -0.03678808 |
| C | -2.69722017 | -1.10642348 | -0.55509745 |
| C | -1.46290683 | -1.64998423 | 0.20058142  |
| C | -0.19713293 | -0.94089899 | -0.17908599 |
| C | -0.94711967 | 1.35469147  | 0.62231720  |
| H | -3.49392677 | -1.84637306 | -0.44742705 |
| H | -3.46201796 | 0.14244305  | 1.02425523  |
| H | -4.13523775 | 0.48207754  | -0.55744079 |
| H | -1.98526260 | 1.55118952  | -1.26434466 |
| H | -2.76155219 | 2.33981423  | 0.09530334  |
| H | -1.63084883 | -1.54831825 | 1.27746953  |
| H | -1.33966752 | -2.71200386 | -0.01507268 |
| H | -1.19385437 | 1.06465146  | 1.65678863  |
| H | -0.47354199 | 2.33525873  | 0.68265631  |
| H | -2.47294881 | -1.04166681 | -1.62502371 |
| C | 0.06234988  | 0.38500647  | 0.13547996  |
| C | 1.48243308  | 0.81999661  | 0.01471485  |
| C | 1.66784057  | -1.42508642 | 0.63937736  |
| H | 0.34175230  | -1.37217667 | -1.02268923 |
| H | 2.02064244  | -2.39004169 | 0.28832208  |
| H | 1.24866616  | -1.39701917 | 1.63544927  |
| C | 3.61424119  | -0.38208622 | -0.49422760 |
| H | 3.73458181  | -1.34850047 | -0.98503263 |
| H | 3.69236587  | 0.42607972  | -1.21682551 |
| H | 4.38122706  | -0.26612969 | 0.27203709  |



|   |            |             |             |
|---|------------|-------------|-------------|
| O | 1.88633978 | 1.94047930  | -0.19201657 |
| N | 2.28547386 | -0.32825400 | 0.12447546  |

**59**

|   |             |             |             |
|---|-------------|-------------|-------------|
| C | -2.34814100 | 1.32610000  | -0.43604900 |
| C | -3.08579200 | 0.22847400  | 0.33963700  |
| C | -2.67649300 | -1.20568000 | -0.00933100 |
| C | -1.26079400 | -1.61007000 | 0.39706900  |
| C | -0.11944400 | -0.87909800 | -0.36383300 |
| C | -0.90720900 | 1.58204800  | 0.00314300  |
| H | -3.36289200 | -1.89528600 | 0.48954500  |
| H | -2.96547700 | 0.39636800  | 1.41624200  |
| H | -4.15342700 | 0.33483200  | 0.13231800  |
| H | -2.35323000 | 1.09819200  | -1.50775000 |
| H | -2.88302000 | 2.27041100  | -0.31949600 |
| H | -1.10318600 | -1.46226500 | 1.46886800  |
| H | -1.11376100 | -2.67276800 | 0.19454100  |
| H | -0.86214600 | 1.81782400  | 1.09235400  |
| H | -0.46278400 | 2.49547100  | -0.41859200 |
| H | -2.80582800 | -1.36989000 | -1.08506100 |
| C | 0.07096400  | 0.53308500  | -0.10294200 |
| C | 1.53149300  | 0.83680000  | 0.06621100  |
| C | 1.27619500  | -1.50209800 | -0.21662600 |
| H | 1.57508600  | -2.07761300 | -1.09567600 |
| H | 1.32220400  | -2.16090300 | 0.65513300  |
| C | 3.59941300  | -0.51181100 | 0.05560200  |
| H | 3.97144800  | -1.00488800 | -0.84489100 |
| H | 4.04293700  | 0.47645600  | 0.15022300  |
| H | 3.85811900  | -1.11964100 | 0.92570700  |
| O | 2.01387800  | 1.94095000  | 0.25029200  |
| H | -0.40878800 | -0.88543900 | -1.43637900 |
| N | 2.15893900  | -0.36499400 | -0.03095700 |

**TS60**

|   |             |             |             |
|---|-------------|-------------|-------------|
| C | 2.40236822  | -1.27965454 | -0.76145347 |
| C | 3.02427691  | -0.27325149 | 0.20320523  |
| C | 2.46384583  | 1.14701948  | 0.00422311  |
| C | 0.99783610  | 2.04200633  | 0.79693843  |
| C | 0.74720795  | 0.81900468  | 0.27626339  |
| C | 0.93308807  | -1.55733361 | -0.44673930 |
| H | 3.03089401  | 1.82872764  | 0.64287220  |
| H | 2.91234984  | -0.58249779 | 1.24477042  |
| H | 4.09514797  | -0.17284726 | 0.00806208  |
| H | 2.50283902  | -0.90052369 | -1.78248373 |
| H | 2.96212165  | -2.21520535 | -0.71503684 |
| H | 1.17384605  | 2.16336765  | 1.86216061  |
| H | 0.94535969  | 2.94086637  | 0.19022417  |
| H | 0.83324743  | -2.29820822 | 0.35276132  |
| H | 0.41374416  | -1.97143160 | -1.31537642 |
| H | 2.48591561  | 1.50472391  | -1.02088950 |
| C | 0.19355423  | -0.33769564 | 0.03070672  |
| C | -1.25966619 | -0.52572389 | 0.44529669  |
| C | -3.60528123 | 0.01622533  | 0.17725569  |
| H | -4.16405825 | -0.59314561 | -0.53798019 |
| H | -3.64975016 | -0.44653586 | 1.15874150  |
| H | -4.05078318 | 1.01220047  | 0.21800352  |
| O | -1.46337334 | -1.27437642 | 1.39721268  |

|   |             |            |             |
|---|-------------|------------|-------------|
| N | -2.20922487 | 0.13458979 | -0.24140179 |
| C | -1.98128158 | 0.91061386 | -1.45879363 |
| H | -2.14961397 | 1.97434647 | -1.27056471 |
| H | -0.97010480 | 0.76855815 | -1.82818147 |
| H | -2.68125415 | 0.57615782 | -2.22731372 |

**61**

|   |             |             |             |
|---|-------------|-------------|-------------|
| C | -2.51023802 | 1.05088304  | -0.05590356 |
| C | -3.05499159 | -0.22934404 | 0.58220825  |
| C | -2.45532229 | -1.45999524 | -0.09710887 |
| C | -0.93243893 | -1.46607798 | 0.04885114  |
| C | -0.27456690 | -0.16141105 | -0.16688074 |
| C | -0.99863873 | 1.06426153  | -0.15667426 |
| H | -2.85267176 | -2.37988327 | 0.33396692  |
| H | -2.81554357 | -0.24355706 | 1.65100719  |
| H | -4.14284187 | -0.24003129 | 0.49900874  |
| H | -2.90759989 | 1.14681100  | -1.07231463 |
| H | -2.83628047 | 1.93454753  | 0.49493724  |
| H | -0.65394644 | -1.73500123 | 1.08571894  |
| H | -0.44013982 | -2.22792199 | -0.56210503 |
| H | -2.71282339 | -1.46332212 | -1.16042791 |
| C | 1.16582037  | -0.19998500 | -0.55291160 |
| C | 3.54928024  | -0.21969601 | -0.16061744 |
| H | 4.02869115  | -1.08338379 | 0.30376440  |
| H | 3.55153844  | -0.33533448 | -1.24124917 |
| H | 4.09274131  | 0.68598539  | 0.11399443  |
| O | 1.22083509  | -0.34534641 | -1.78028099 |
| C | -0.29113970 | 2.22571526  | -0.22860676 |
| H | 0.78691784  | 2.24289778  | -0.33279237 |
| H | -0.79337549 | 3.18552636  | -0.18778797 |
| N | 2.16732002  | -0.11847946 | 0.31130967  |
| C | 1.96858672  | 0.03889662  | 1.75098822  |
| H | 0.90941826  | 0.12601615  | 1.98486285  |
| H | 2.37767543  | -0.82613408 | 2.27566017  |
| H | 2.47694000  | 0.94236783  | 2.09213012  |

**N2**

|   |            |            |             |
|---|------------|------------|-------------|
| N | 0.00000000 | 0.00000000 | 0.54768300  |
| N | 0.00000000 | 0.00000000 | -0.54768300 |

**TfOH**

|   |             |             |             |
|---|-------------|-------------|-------------|
| H | 0.23652171  | -0.62692107 | 0.32420468  |
| O | -0.42560525 | -1.28627007 | 0.59619497  |
| S | -1.67092203 | -1.32832052 | -0.42836669 |
| O | -2.26538156 | -2.63742061 | -0.30260951 |
| O | -1.29918192 | -0.74810999 | -1.70243456 |
| C | -2.83113062 | -0.10857839 | 0.42939101  |
| F | -3.95946318 | -0.04336010 | -0.26909780 |
| F | -3.08884145 | -0.52547043 | 1.66274760  |
| F | -2.25949670 | 1.09207518  | 0.47134031  |

**S4**

|   |             |            |             |
|---|-------------|------------|-------------|
| C | -0.69821474 | 3.28216846 | -0.00341545 |
| C | 0.37313592  | 2.98896278 | 1.06230857  |
| C | -0.19737170 | 2.59765978 | 2.42790758  |
| C | -0.77304180 | 1.12732988 | 2.57406765  |
| C | -1.48499364 | 0.88524743 | 1.37221035  |

|   |             |             |             |
|---|-------------|-------------|-------------|
| C | -1.29378101 | 2.07154376  | -0.71589392 |
| H | 0.58786020  | 2.63166911  | 3.18520679  |
| H | 1.06950103  | 2.22254950  | 0.71219901  |
| H | 0.95454395  | 3.90108472  | 1.21684636  |
| H | -1.50258131 | 3.87295565  | 0.44776001  |
| H | -0.25892704 | 3.90741232  | -0.78466923 |
| H | 0.04904575  | 0.41150777  | 2.64418185  |
| H | -1.40828024 | 1.09124126  | 3.46047220  |
| H | -0.55005504 | 1.58150600  | -1.34944483 |
| H | -2.13191864 | 2.36526521  | -1.35126818 |
| H | -0.98404464 | 3.29565376  | 2.71914050  |
| C | -1.83409561 | 0.92400340  | 0.14939599  |
| C | -2.66901039 | -0.12631863 | -0.61715678 |
| C | -3.18627985 | -1.34997438 | 0.14512912  |
| C | -4.66560371 | -1.03783574 | 0.47563871  |
| H | -5.23647032 | -0.86294907 | -0.43741310 |
| H | -5.10056272 | -1.89090700 | 1.00080039  |
| H | -4.75733303 | -0.15847055 | 1.11853967  |
| C | -2.40147191 | -1.58773084 | 1.42180892  |
| H | -2.45214837 | -0.70488419 | 2.08527303  |
| H | -2.86191469 | -2.38090231 | 2.01564699  |
| H | -1.36227481 | -1.84678066 | 1.22799665  |
| C | -3.08665540 | -2.57212311 | -0.78474383 |
| H | -3.50386052 | -3.44490672 | -0.27805617 |
| H | -3.64842290 | -2.40013009 | -1.70334162 |
| H | -2.04569186 | -2.77112087 | -1.04054557 |
| O | -2.93696261 | 0.10674594  | -1.76184677 |
| O | -0.09867445 | -1.09400241 | -1.05599254 |
| S | 1.21154592  | -1.14147315 | -0.37154156 |
| O | 1.83236738  | -2.47448103 | -0.29793902 |
| O | 1.28053844  | -0.34443163 | 0.87225643  |
| C | 2.33433858  | -0.18827184 | -1.54166075 |
| F | 3.58541442  | -0.12364095 | -1.06009972 |
| F | 2.37998933  | -0.77112402 | -2.74869608 |
| F | 1.89006173  | 1.07284030  | -1.70686833 |

#### TS-S5

|   |             |             |             |
|---|-------------|-------------|-------------|
| C | 0.28913711  | 2.93554624  | 1.41656973  |
| C | -0.39591321 | 3.27372833  | 0.08069012  |
| C | 0.57568772  | 3.44507242  | -1.08986470 |
| C | 1.18118021  | 2.12575079  | -1.71529934 |
| C | 1.51185659  | 1.28740909  | -0.61398653 |
| C | 0.65217288  | 1.47035940  | 1.63794697  |
| H | 0.06533646  | 3.91168218  | -1.93458921 |
| H | -1.15293306 | 2.52483437  | -0.16699025 |
| H | -0.91612234 | 4.22731026  | 0.19909085  |
| H | 1.18542789  | 3.55499218  | 1.52913736  |
| H | -0.37858370 | 3.20974715  | 2.23716597  |
| H | 0.42506926  | 1.61900667  | -2.31988541 |
| H | 2.05032159  | 2.39417619  | -2.31817428 |
| H | -0.24556080 | 0.85418071  | 1.73634520  |
| H | 1.23831045  | 1.34773517  | 2.55106028  |
| H | 1.40531872  | 4.09063843  | -0.79566250 |
| C | 1.45723308  | 0.75874131  | 0.54490645  |
| C | 2.03309303  | -0.61278097 | 0.95636464  |
| C | 2.83671916  | -1.39905601 | -0.08441531 |
| C | 4.32214804  | -1.08201105 | 0.21292100  |

|   |             |             |             |
|---|-------------|-------------|-------------|
| H | 4.58336645  | -1.37649988 | 1.23039825  |
| H | 4.95168282  | -1.63975033 | -0.48360225 |
| H | 4.53870611  | -0.01743177 | 0.09154165  |
| C | 2.47743391  | -0.96998172 | -1.49158711 |
| H | 2.60258745  | 0.12916043  | -1.60274905 |
| H | 3.18345048  | -1.37007027 | -2.22292395 |
| H | 1.46263720  | -1.24804575 | -1.76682304 |
| C | 2.55032049  | -2.89738247 | 0.11329144  |
| H | 3.15364297  | -3.47652077 | -0.58881760 |
| H | 2.80602812  | -3.20271630 | 1.12837259  |
| H | 1.49548539  | -3.10895010 | -0.06353549 |
| O | 1.89385747  | -0.96062691 | 2.09479694  |
| O | -0.45573994 | -1.40253452 | 0.04525192  |
| S | -1.53748905 | -0.95411154 | -0.85818883 |
| O | -2.07315076 | -1.99102171 | -1.75599855 |
| O | -1.30333037 | 0.36402597  | -1.48618535 |
| C | -2.95881187 | -0.60774355 | 0.32401434  |
| F | -4.04397973 | -0.18318758 | -0.34199854 |
| F | -3.29421069 | -1.70941171 | 1.01159114  |
| F | -2.61918891 | 0.34727668  | 1.21126123  |

### S6

|   |             |             |             |
|---|-------------|-------------|-------------|
| C | 2.41281359  | 0.76515504  | 1.31841395  |
| C | 3.52064256  | 0.13669115  | 0.46287181  |
| C | 3.22046576  | -1.26072170 | -0.08601800 |
| C | 2.14148922  | -1.32127603 | -1.18825537 |
| C | 0.81203330  | -0.90199947 | -0.68429078 |
| C | 1.16632914  | 1.23140175  | 0.55534478  |
| H | 4.12950155  | -1.67411727 | -0.53054783 |
| H | 3.76608836  | 0.81063624  | -0.36728412 |
| H | 4.42323559  | 0.06616193  | 1.07657698  |
| H | 2.11168602  | 0.06514960  | 2.10535286  |
| H | 2.82211710  | 1.64357630  | 1.82440739  |
| H | 2.41121232  | -0.65302813 | -2.01546701 |
| H | 1.46157044  | 1.89945594  | -0.26389150 |
| H | 0.51807840  | 1.81300657  | 1.21279283  |
| H | 2.93360756  | -1.93125810 | 0.72886266  |
| C | 0.31640095  | 0.13969143  | -0.03772261 |
| C | -1.17557318 | 0.25387405  | 0.06406462  |
| C | -1.96364699 | -0.89668154 | -0.60031688 |
| C | -2.50628202 | -1.79747903 | 0.52938534  |
| H | -3.14885418 | -1.20968906 | 1.18546210  |
| H | -3.08383780 | -2.61685375 | 0.10158760  |
| H | -1.69874051 | -2.22864320 | 1.12252657  |
| C | -1.04971486 | -1.63711905 | -1.51786656 |
| H | -1.14377357 | -2.72547157 | -1.55587657 |
| H | -0.80531680 | -1.18114737 | -2.47085012 |
| C | -3.11747447 | -0.28949613 | -1.42881616 |
| H | -3.71733898 | -1.08448266 | -1.87400642 |
| H | -3.74854359 | 0.29961953  | -0.76270690 |
| H | -2.74373571 | 0.35952488  | -2.22297520 |
| O | -1.71724665 | 1.17160788  | 0.62768305  |
| H | 0.04067335  | -1.84036995 | -0.82799446 |
| H | 2.07557054  | -2.33533048 | -1.57842514 |
| O | -1.28897409 | -4.69610980 | -0.58481563 |
| S | 0.13282278  | -5.09927939 | -0.65147060 |
| O | 0.95776830  | -4.19423097 | -1.48520597 |

|   |            |             |             |
|---|------------|-------------|-------------|
| O | 0.38731049 | -6.53562957 | -0.82505614 |
| C | 0.76086185 | -4.73429445 | 1.08416288  |
| F | 2.05877112 | -5.04737059 | 1.20353957  |
| F | 0.62847548 | -3.41838211 | 1.36304288  |
| F | 0.07452944 | -5.42148098 | 2.00624001  |

**TS-S7**

|   |             |             |             |
|---|-------------|-------------|-------------|
| C | 2.49329803  | 1.64283454  | 0.35616478  |
| C | 3.60146550  | 0.60484682  | 0.14343297  |
| C | 3.31809219  | -0.78924257 | 0.71219115  |
| C | 2.23274299  | -1.58883063 | -0.02689210 |
| C | 0.86826579  | -0.99249783 | 0.08968235  |
| C | 1.22188201  | 1.44412984  | -0.48368584 |
| H | 4.23379822  | -1.38391095 | 0.66166466  |
| H | 3.82286930  | 0.52204172  | -0.92766623 |
| H | 4.51247201  | 0.98368079  | 0.61556820  |
| H | 2.21853170  | 1.67895376  | 1.41587980  |
| H | 2.88621828  | 2.63093437  | 0.10325205  |
| H | 2.47397801  | -1.65048364 | -1.09460012 |
| H | 1.49409261  | 1.36013322  | -1.54646593 |
| H | 0.57162606  | 2.31738518  | -0.40532692 |
| H | 3.05342328  | -0.71113996 | 1.77211468  |
| C | 0.40150394  | 0.24595781  | -0.15970548 |
| C | -1.09945185 | 0.34054749  | -0.17171894 |
| C | -1.77626995 | -1.04000708 | -0.15914669 |
| C | -2.61667926 | -1.19019151 | 1.12106006  |
| H | -3.35304768 | -0.38798984 | 1.17582410  |
| H | -3.14166274 | -2.14700986 | 1.10981186  |
| H | -1.99470782 | -1.14676636 | 2.01864299  |
| C | -0.67121985 | -2.05911784 | -0.24785550 |
| H | 0.19067281  | -1.59006414 | 0.80826703  |
| H | -0.73420591 | -2.94014081 | 0.39052932  |
| H | -0.28661132 | -2.34461924 | -1.22651540 |
| C | -2.66345871 | -1.14636417 | -1.42091378 |
| H | -3.15492565 | -2.11995577 | -1.44929245 |
| H | -3.42323281 | -0.36454489 | -1.38266283 |
| H | -2.07688736 | -1.02328375 | -2.33317378 |
| O | -1.69604168 | 1.38775170  | -0.22812937 |
| H | 2.19966506  | -2.61560848 | 0.33603662  |
| O | 0.86239353  | -3.56174930 | -2.48302571 |
| S | 1.04376493  | -4.83192946 | -1.74031421 |
| O | 1.04319095  | -4.67270515 | -0.26960701 |
| O | 2.06654235  | -5.73768915 | -2.28420275 |
| C | -0.57745138 | -5.72911296 | -2.06027608 |
| F | -0.60531258 | -6.91571429 | -1.43548037 |
| F | -1.61519376 | -4.99758070 | -1.60733496 |
| F | -0.76396036 | -5.94155591 | -3.37123055 |

**S8**

|   |             |            |             |
|---|-------------|------------|-------------|
| C | -1.78483071 | 2.38921460 | 1.38053553  |
| C | -1.78745405 | 3.25704869 | 0.11611713  |
| C | -1.22173965 | 2.60120154 | -1.14954535 |
| C | -2.06928496 | 1.45596769 | -1.73337373 |
| C | -2.07386980 | 0.20257284 | -0.91449973 |
| C | -2.75322336 | 1.19696993 | 1.35108532  |
| H | -1.12653936 | 3.36902792 | -1.92361567 |
| H | -2.81315167 | 3.59328358 | -0.08449339 |

|   |             |             |             |
|---|-------------|-------------|-------------|
| H | -1.20430871 | 4.16158655  | 0.31840504  |
| H | -0.76941598 | 2.02228182  | 1.57084519  |
| H | -2.05204951 | 3.02254809  | 2.23266793  |
| H | -3.10556473 | 1.80394718  | -1.84377792 |
| H | -3.75842268 | 1.56162264  | 1.10133937  |
| H | -2.82448775 | 0.75904153  | 2.35011384  |
| H | -0.20914371 | 2.23148011  | -0.95125878 |
| C | -2.36829198 | 0.10350184  | 0.40053687  |
| C | -2.26300438 | -1.30008687 | 0.81656305  |
| C | -1.84226934 | -2.15942929 | -0.38939922 |
| C | -0.49410433 | -2.82966259 | -0.08470147 |
| H | -0.57708591 | -3.46994813 | 0.79637443  |
| H | -0.17702592 | -3.44440505 | -0.93148883 |
| H | 0.28230028  | -2.08328095 | 0.10541036  |
| C | -1.73403079 | -1.12722626 | -1.53147762 |
| H | -0.73020952 | -1.09383233 | -1.97017250 |
| H | -2.41960572 | -1.34686160 | -2.35803624 |
| C | -2.92074946 | -3.21846540 | -0.65966257 |
| H | -2.63732471 | -3.83814849 | -1.51474251 |
| H | -3.04531375 | -3.86568520 | 0.21129703  |
| H | -3.88463463 | -2.75144625 | -0.88059399 |
| O | -2.47152516 | -1.74162613 | 1.93903576  |
| H | -1.71513906 | 1.22196896  | -2.74096833 |

#### TS-S9

|   |             |             |             |
|---|-------------|-------------|-------------|
| C | 2.51061993  | -1.44880182 | -0.84296550 |
| C | 3.31877132  | -0.34858987 | -0.16445057 |
| C | 2.70516737  | 1.03247220  | -0.44443744 |
| C | 1.18468609  | 2.21808336  | 0.40680142  |
| C | 1.15846086  | 0.89471375  | 0.03361172  |
| C | 1.11996219  | -1.58306637 | -0.21980733 |
| H | 3.29157392  | 1.79324455  | 0.08293835  |
| H | 3.40501177  | -0.52029992 | 0.91135710  |
| H | 4.33338961  | -0.29464490 | -0.57044676 |
| H | 2.41467421  | -1.21729771 | -1.90648035 |
| H | 3.03715867  | -2.40161498 | -0.75948609 |
| H | 1.25967249  | 2.51293037  | 1.45250903  |
| H | 1.25554842  | 2.97644197  | -0.37300859 |
| H | 1.16620141  | -2.13336773 | 0.72710139  |
| H | 0.45512557  | -2.15481390 | -0.87168077 |
| H | 2.64349004  | 1.29223394  | -1.49918110 |
| C | 0.49615523  | -0.24907946 | 0.08892386  |
| C | -0.95464528 | -0.27946800 | 0.53715924  |
| O | -1.16596440 | -0.69459568 | 1.65723528  |
| C | -2.04660443 | 0.15865289  | -0.43194339 |
| C | -3.41342420 | -0.28038926 | 0.10571438  |
| H | -3.62418588 | 0.17298152  | 1.07567822  |
| H | -4.19194892 | 0.02695683  | -0.59601808 |
| H | -3.46242926 | -1.36539449 | 0.22024364  |
| C | -1.78242038 | -0.46111317 | -1.81876202 |
| H | -0.80979821 | -0.16950405 | -2.21886763 |
| H | -1.83929562 | -1.55198954 | -1.78141035 |
| H | -2.54522042 | -0.10773439 | -2.51604869 |
| C | -2.00182751 | 1.70234696  | -0.54345584 |
| H | -2.09473740 | 2.17523955  | 0.43770896  |
| H | -1.09354390 | 2.05490507  | -1.03102135 |
| H | -2.84371617 | 2.03033525  | -1.15726886 |

|   |             |            |             |
|---|-------------|------------|-------------|
| O | 0.98617718  | 3.23901207 | -2.40709879 |
| S | 0.73980150  | 2.30553391 | -3.53355059 |
| O | -0.59266956 | 2.41139028 | -4.14769972 |
| O | 1.22500657  | 0.93057491 | -3.29262937 |
| C | 1.90348230  | 2.94624769 | -4.86345826 |
| F | 1.81825185  | 2.19708857 | -5.97380457 |
| F | 1.60805993  | 4.21372042 | -5.19091118 |
| F | 3.17765306  | 2.91271455 | -4.43591058 |

**S10**

|   |             |             |             |
|---|-------------|-------------|-------------|
| C | -3.11864281 | 0.74010319  | 0.22468341  |
| C | -3.28313277 | -0.71706221 | 0.66016743  |
| C | -2.48727388 | -1.63877348 | -0.26413958 |
| C | -0.99301864 | -1.31300107 | -0.18773287 |
| C | -0.72374819 | 0.17489493  | -0.24862522 |
| C | -1.68572275 | 1.09539572  | -0.09312781 |
| H | -2.64475493 | -2.68781247 | -0.00170745 |
| H | -2.91926499 | -0.83313878 | 1.68734509  |
| H | -4.34158742 | -0.98813963 | 0.66307143  |
| H | -3.73262820 | 0.94256671  | -0.66285256 |
| H | -0.57113518 | -1.71483993 | 0.74133101  |
| H | -0.45070227 | -1.80570437 | -1.00110141 |
| H | -2.83518840 | -1.50869531 | -1.29470459 |
| C | 0.70362825  | 0.56861504  | -0.52699321 |
| O | 1.03069295  | 0.89880127  | -1.65281618 |
| C | -1.39383621 | 2.55350724  | -0.20408671 |
| H | -0.42439852 | 2.78211166  | -0.63658210 |
| H | -2.17866063 | 3.08813761  | -0.73798521 |
| C | 1.73428899  | 0.49739468  | 0.61423417  |
| C | 2.45297812  | -0.86630579 | 0.48368719  |
| H | 3.22899349  | -0.93570413 | 1.25040373  |
| H | 1.76758406  | -1.70462647 | 0.62315819  |
| H | 2.92517661  | -0.96368105 | -0.49609311 |
| C | 2.75516383  | 1.63243064  | 0.43043702  |
| H | 3.52346324  | 1.55809136  | 1.20388754  |
| H | 3.23615556  | 1.57772448  | -0.54617551 |
| H | 2.27492240  | 2.60993181  | 0.52461214  |
| C | 1.07574431  | 0.61590607  | 1.99778633  |
| H | 0.55843671  | 1.57012836  | 2.11140710  |
| H | 0.35533153  | -0.18268666 | 2.18304261  |
| H | 1.84765449  | 0.55430169  | 2.76901278  |
| H | -3.48517863 | 1.41465463  | 1.00510689  |
| O | -1.37384210 | 3.07959391  | 1.20213935  |
| S | -1.76138958 | 4.59301729  | 1.52032536  |
| O | -2.04923351 | 4.66662004  | 2.93649669  |
| O | -2.66445630 | 5.13334619  | 0.52060653  |
| C | -0.09130207 | 5.43350852  | 1.25967901  |
| F | -0.21442045 | 6.73310399  | 1.51167663  |
| F | 0.81308256  | 4.90226616  | 2.07645140  |
| F | 0.29801526  | 5.25879525  | -0.00446858 |

**S11**

|   |             |             |             |
|---|-------------|-------------|-------------|
| C | -3.23284408 | -1.36667201 | -1.23192745 |
| C | -3.45843883 | -2.26024903 | 0.00196533  |
| C | -2.18534233 | -2.60102363 | 0.78173456  |
| C | -1.52533528 | -1.48188223 | 1.78852100  |
| C | -1.75007324 | -0.36592475 | 1.00589964  |

|   |             |             |             |
|---|-------------|-------------|-------------|
| C | -3.10752033 | 0.13153269  | -0.95425951 |
| H | -2.38577899 | -3.39709652 | 1.49969550  |
| H | -4.22500671 | -1.84281051 | 0.66400577  |
| H | -3.84834961 | -3.22011472 | -0.34609879 |
| H | -2.33443695 | -1.70519818 | -1.75154694 |
| H | -4.07270032 | -1.49217743 | -1.91825274 |
| H | -2.07267476 | -1.46613317 | 2.73163059  |
| H | -4.07494100 | 0.56704804  | -0.68436150 |
| H | -2.74347350 | 0.66018064  | -1.83792730 |
| H | -1.38453787 | -2.88164074 | 0.10302121  |
| C | -2.16134039 | 0.51565312  | 0.17630301  |
| C | -1.75636749 | 1.95950903  | 0.34802886  |
| C | -0.45110034 | 3.42955299  | 1.67071645  |
| H | -1.27670915 | 4.11351479  | 1.86150766  |
| H | 0.17330096  | 3.31820938  | 2.55173177  |
| H | 0.13662463  | 3.76985002  | 0.81959038  |
| O | -2.12448372 | 2.82930190  | -0.39388453 |
| O | -0.96571828 | 2.09804645  | 1.40641483  |
| H | -0.46843012 | -1.72872099 | 1.89196893  |
| O | 1.22209816  | -0.69970451 | 0.66149913  |
| S | 1.33440485  | -1.12252677 | -0.75194510 |
| O | 0.09345620  | -1.70063552 | -1.31109739 |
| O | 2.57642402  | -1.83248767 | -1.10015366 |
| C | 1.49135506  | 0.51013887  | -1.67227271 |
| F | 1.61681754  | 0.30689198  | -2.99231025 |
| F | 0.40252058  | 1.28119339  | -1.47743057 |
| F | 2.56225926  | 1.19997409  | -1.25133219 |

#### TS-S12

|   |             |             |             |
|---|-------------|-------------|-------------|
| C | 4.47495507  | 1.24951683  | 0.29841038  |
| C | 3.61711630  | 2.52309692  | 0.20579986  |
| C | 2.70247373  | 2.56697114  | -1.01864290 |
| C | 1.40260165  | 1.66348396  | -0.98212213 |
| C | 1.80795940  | 0.40328343  | -0.45684741 |
| C | 3.79219334  | 0.02187044  | 0.89298673  |
| H | 2.29453701  | 3.57124428  | -1.14848705 |
| H | 3.04052318  | 2.66024180  | 1.12482685  |
| H | 4.29015959  | 3.37981461  | 0.12133206  |
| H | 4.87375392  | 1.00421520  | -0.69182973 |
| H | 5.33824852  | 1.45024526  | 0.93720408  |
| H | 0.65237127  | 2.09106990  | -0.30974209 |
| H | 1.01289629  | 1.59047200  | -1.99868395 |
| H | 3.53775478  | 0.19354139  | 1.94337154  |
| H | 4.44258874  | -0.85241948 | 0.83514369  |
| H | 3.26449634  | 2.30824030  | -1.91747482 |
| C | 2.46430754  | -0.42561652 | 0.26871346  |
| C | 2.01639426  | -1.83339925 | 0.64250936  |
| C | -0.08562356 | -1.26235008 | -0.31487622 |
| H | 0.46496316  | -0.58673993 | -1.02267992 |
| H | -0.79729603 | -1.78821414 | -0.94880104 |
| H | -0.55742797 | -0.68104202 | 0.47317823  |
| O | 2.74378241  | -2.57480718 | 1.23442118  |
| O | 0.80932500  | -2.21684891 | 0.20839679  |
| O | -0.33306424 | 1.54836282  | 1.69542995  |
| S | 0.52726711  | 0.97619270  | 2.75525310  |
| O | 1.78060259  | 1.71390138  | 3.00051809  |
| O | 0.67716889  | -0.49374537 | 2.68094659  |



|   |             |            |            |
|---|-------------|------------|------------|
| C | -0.47095956 | 1.23821001 | 4.32525389 |
| F | 0.18600976  | 0.75779676 | 5.39115889 |
| F | -0.70023592 | 2.54499801 | 4.52774399 |
| F | -1.65549582 | 0.61291703 | 4.24492625 |

**S13**

|   |             |             |             |
|---|-------------|-------------|-------------|
| C | -1.99761271 | 0.51237370  | -1.27573285 |
| C | -3.26502696 | 0.88074224  | -0.49578937 |
| C | -3.53882607 | 0.05780586  | 0.76800399  |
| C | -2.47370132 | 0.20471268  | 1.87627569  |
| C | -1.20498433 | -0.54618894 | 1.59952208  |
| C | -0.68494035 | 0.73343143  | -0.50254693 |
| H | -4.50047705 | 0.37366449  | 1.18381804  |
| H | -3.20921764 | 1.94122431  | -0.21780553 |
| H | -4.12713025 | 0.78527730  | -1.16423890 |
| H | -2.04895095 | -0.53192892 | -1.60308014 |
| H | -1.96580379 | 1.12328188  | -2.18335422 |
| H | -2.24518440 | 1.27156103  | 2.00232432  |
| H | -0.71775422 | 1.71668487  | -0.01733730 |
| H | 0.14833081  | 0.75584794  | -1.20414666 |
| H | -3.64249941 | -1.00155314 | 0.50915443  |
| C | -0.40545327 | -0.32080261 | 0.54303419  |
| C | 0.76922832  | -1.17875521 | 0.31043944  |
| C | 1.89065170  | -3.09105854 | 1.17717625  |
| H | 2.69092827  | -3.11136135 | 1.90999561  |
| H | 2.25562548  | -3.12188471 | 0.15369137  |
| O | 1.43955426  | -1.20059864 | -0.69408213 |
| H | -0.93793938 | -1.33974135 | 2.28686293  |
| O | 1.07097614  | -1.98707458 | 1.39673967  |
| H | -2.89011215 | -0.14060281 | 2.82424280  |
| O | -0.25356425 | -3.88107077 | -0.57523342 |
| S | 0.03917712  | -4.86408862 | 0.44897510  |
| O | -0.99045738 | -5.51399525 | 1.22616221  |
| O | 1.13368886  | -4.30063297 | 1.49389960  |
| C | 1.07480123  | -6.22169331 | -0.36039368 |
| F | 1.41309981  | -7.13165400 | 0.54468932  |
| F | 0.35579935  | -6.78885705 | -1.32308478 |
| F | 2.17399949  | -5.67929713 | -0.88232324 |

**TS-S14**

|   |            |             |             |
|---|------------|-------------|-------------|
| C | 2.76768811 | 1.72442348  | -1.15365537 |
| C | 2.46950810 | 2.73511985  | -0.04081906 |
| C | 1.27974766 | 2.40002293  | 0.86117062  |
| C | 1.46447469 | 1.13264251  | 1.72795872  |
| C | 1.36421232 | -0.12589864 | 0.92844488  |
| C | 3.26787706 | 0.35030663  | -0.67367042 |
| H | 1.11424878 | 3.23016768  | 1.55270651  |
| H | 3.36763368 | 2.85968670  | 0.57678083  |
| H | 2.28023416 | 3.70726577  | -0.50560513 |
| H | 1.88243373 | 1.58370577  | -1.78192585 |
| H | 3.54630018 | 2.13826249  | -1.79948414 |
| H | 2.44399785 | 1.17063469  | 2.21808817  |
| H | 4.06240144 | 0.49070780  | 0.07361273  |
| H | 3.71766676 | -0.19673067 | -1.50214080 |
| H | 0.36431742 | 2.29622147  | 0.27508318  |
| C | 2.22223228 | -0.52046649 | -0.04648973 |
| C | 2.14195441 | -1.91696839 | -0.52684318 |

|   |             |             |             |
|---|-------------|-------------|-------------|
| C | 1.17312247  | -2.26877957 | 1.54775666  |
| H | 0.38209116  | -0.63860359 | 1.02471105  |
| H | 0.21542508  | -2.40621741 | 2.03739851  |
| H | 2.08464968  | -2.13406218 | 2.11964303  |
| O | 2.66618728  | -2.45034532 | -1.44458425 |
| O | 1.22824056  | -2.65980432 | 0.31167951  |
| H | 0.69389915  | 1.11456210  | 2.49692747  |
| O | -1.80994724 | 1.18046768  | 1.33228855  |
| S | -2.34191752 | -0.05227257 | 0.72435476  |
| O | -3.77239159 | -0.31775949 | 0.92910333  |
| O | -1.45711087 | -1.23597989 | 0.90413912  |
| C | -2.19465822 | 0.27378283  | -1.12243265 |
| F | -2.62615126 | -0.77764285 | -1.83363795 |
| F | -2.91502833 | 1.34675400  | -1.47859635 |
| F | -0.91056300 | 0.50345802  | -1.45837472 |

### S15

|   |             |             |             |
|---|-------------|-------------|-------------|
| C | -2.77450289 | 1.10480377  | 1.52949427  |
| C | -3.27678119 | 1.97569199  | 0.37041017  |
| C | -2.39191246 | 1.99174833  | -0.88291934 |
| C | -2.40136433 | 0.69990116  | -1.71550462 |
| C | -1.81497708 | -0.49290021 | -1.03296918 |
| C | -2.88503532 | -0.40990582 | 1.30889633  |
| H | -2.72684957 | 2.80326976  | -1.53589314 |
| H | -4.29186175 | 1.66221879  | 0.09391688  |
| H | -3.36421812 | 3.00513688  | 0.73209146  |
| H | -1.73189686 | 1.36065262  | 1.75082097  |
| H | -3.35290983 | 1.35262281  | 2.42488195  |
| H | -3.43687473 | 0.46049423  | -1.99270819 |
| H | -3.93082018 | -0.66497959 | 1.09312164  |
| H | -2.62890306 | -0.93418475 | 2.23283457  |
| H | -1.36016435 | 2.22608434  | -0.59769685 |
| C | -2.01776839 | -0.94903127 | 0.21421562  |
| C | -1.22537442 | -2.18188612 | 0.38266498  |
| C | -0.86641942 | -1.41430827 | -1.73614079 |
| H | 0.06023344  | -0.91342180 | -2.03081503 |
| H | -1.31073323 | -1.87967297 | -2.62077551 |
| O | -1.12336913 | -2.90868286 | 1.34544505  |
| O | -0.55229361 | -2.44085985 | -0.78136444 |
| H | -1.86897053 | 0.87137683  | -2.65570778 |

### TS-S16

|   |             |             |             |
|---|-------------|-------------|-------------|
| C | -1.73000767 | 2.83094221  | 0.30900494  |
| C | -0.43170230 | 2.03852624  | 0.46876979  |
| C | -0.51229957 | 0.97189451  | 1.56585338  |
| C | -1.00283095 | -0.73791788 | 1.40362085  |
| C | -1.96468626 | -0.01346234 | 0.80357133  |
| C | -2.85299736 | 2.02146698  | -0.33540239 |
| H | 0.50381996  | 0.58745690  | 1.73790237  |
| H | -0.09934620 | 1.59472972  | -0.47225157 |
| H | 0.36848058  | 2.70708491  | 0.79591854  |
| H | -2.04576256 | 3.18815250  | 1.29376297  |
| H | -1.54207351 | 3.71608967  | -0.30114925 |
| H | -0.25415651 | -1.24322265 | 0.78907696  |
| H | -2.75096863 | 2.01695625  | -1.42560614 |
| H | -3.83154449 | 2.45674080  | -0.12356236 |
| H | -0.96959079 | 1.32199754  | 2.48612867  |

|   |             |             |             |
|---|-------------|-------------|-------------|
| C | -2.87474083 | 0.57316930  | 0.07936023  |
| C | -3.98217464 | -0.28873107 | -0.46883893 |
| C | -4.89920980 | -2.46950555 | -0.53892596 |
| H | -5.88843008 | -2.13713307 | -0.22662806 |
| H | -4.84875712 | -2.52908399 | -1.62536376 |
| H | -4.65201553 | -3.42576010 | -0.08773363 |
| O | -4.83341643 | 0.14653793  | -1.20483934 |
| O | -3.89294672 | -1.54921055 | -0.04873384 |
| H | -1.11787243 | -1.06644461 | 2.43171417  |
| O | 2.35980331  | -0.09286704 | 1.56112428  |
| S | 2.67032002  | -0.97852827 | 0.41279906  |
| O | 1.46770869  | -1.55268623 | -0.23523109 |
| O | 3.78553694  | -1.91209259 | 0.62131325  |
| C | 3.31793097  | 0.21848243  | -0.88416937 |
| F | 3.63402573  | -0.42836086 | -2.01539987 |
| F | 2.38917881  | 1.14536785  | -1.17941681 |
| F | 4.41337919  | 0.85429341  | -0.44378616 |

**S17**

|   |             |             |             |
|---|-------------|-------------|-------------|
| C | 2.78210320  | 2.46556288  | -0.52552356 |
| C | 3.40414550  | 1.13952863  | -0.95914624 |
| C | 2.69135413  | -0.02137048 | -0.26662856 |
| C | 1.21564373  | -0.04995009 | -0.66259747 |
| C | 0.56275203  | 1.31391448  | -0.62418776 |
| C | 1.27200845  | 2.45257922  | -0.51651037 |
| H | 3.15885510  | -0.97574736 | -0.52048176 |
| H | 3.30703768  | 1.02830850  | -2.04488354 |
| H | 4.47268156  | 1.13838089  | -0.73097916 |
| H | 3.12975206  | 2.73954137  | 0.47969717  |
| H | 3.11054192  | 3.27871447  | -1.18259541 |
| H | 1.10397321  | -0.45731303 | -1.67594496 |
| H | 0.64828420  | -0.71734630 | -0.01013251 |
| H | 2.77545658  | 0.09858652  | 0.81955601  |
| C | -0.93011306 | 1.26490329  | -0.67306932 |
| C | -2.91976165 | 2.33158805  | -1.40339586 |
| H | -3.15723731 | 3.25229140  | -1.92763090 |
| H | -3.28593444 | 1.46381611  | -1.95137706 |
| H | -3.34468904 | 2.34117310  | -0.39995014 |
| O | -1.58704285 | 0.36031894  | -0.19923970 |
| O | -1.47697516 | 2.29832537  | -1.33308054 |
| C | 0.65276722  | 3.80655921  | -0.35058277 |
| H | -0.36373699 | 3.79113975  | 0.02200477  |
| H | 1.27893389  | 4.44680532  | 0.27007713  |
| O | 0.64241328  | 4.42971642  | -1.70694988 |
| S | -0.47374926 | 5.49047487  | -2.11446384 |
| O | -1.61745780 | 5.44668315  | -1.22244072 |
| O | -0.61839594 | 5.42800832  | -3.55278808 |
| C | 0.44644196  | 7.09084011  | -1.72759427 |
| F | -0.34312631 | 8.12541025  | -2.00347329 |
| F | 0.76813341  | 7.10993338  | -0.43256283 |
| F | 1.55432348  | 7.16716730  | -2.45831094 |

**S18**

|   |             |             |             |
|---|-------------|-------------|-------------|
| C | -4.72946583 | -1.43468532 | -0.36923189 |
| C | -4.12594052 | -2.72684612 | 0.21088846  |
| C | -2.71076131 | -3.04717409 | -0.27590186 |
| C | -1.54004185 | -2.17845122 | 0.33398963  |

|   |             |             |             |
|---|-------------|-------------|-------------|
| C | -1.98391503 | -0.84000760 | 0.28453570  |
| C | -4.25817550 | -0.11867918 | 0.24805492  |
| H | -2.43921109 | -4.06654079 | 0.00473565  |
| H | -4.15518949 | -2.70516638 | 1.30644382  |
| H | -4.76196685 | -3.56032982 | -0.09668742 |
| H | -4.55300596 | -1.40772490 | -1.44949836 |
| H | -5.81332901 | -1.46289269 | -0.23304168 |
| H | -1.30045653 | -2.47661270 | 1.35752980  |
| H | -4.54221076 | -0.05389735 | 1.30225732  |
| H | -4.70400719 | 0.73482005  | -0.26836412 |
| H | -2.65905124 | -2.96901739 | -1.36306804 |
| C | -2.74736219 | 0.17895323  | 0.19231094  |
| C | -2.34114589 | 1.64911273  | 0.07808305  |
| C | -0.02642087 | 0.82984086  | 0.06658229  |
| H | 0.16080812  | 0.39815524  | -0.91805545 |
| H | 0.90841029  | 1.21414675  | 0.47187725  |
| H | -0.30426375 | 0.03388476  | 0.78079779  |
| C | -0.52793104 | 3.25967400  | -0.07576223 |
| H | 0.06548269  | 3.35993776  | -0.98691512 |
| H | -1.37977022 | 3.93204900  | -0.11876758 |
| H | 0.09433800  | 3.50649663  | 0.78678209  |
| O | -3.21949747 | 2.49470161  | 0.01782127  |
| N | -1.01576514 | 1.88411919  | 0.04516601  |
| H | -0.64406041 | -2.31233580 | -0.29122740 |
| O | 1.49582168  | -1.50059477 | 1.51473462  |
| S | 2.14000187  | -2.20356312 | 0.38542962  |
| O | 1.32783847  | -2.21283830 | -0.85623150 |
| O | 2.78921177  | -3.48151102 | 0.71806605  |
| C | 3.58038566  | -1.08022787 | -0.06374322 |
| F | 4.26468621  | -1.57162048 | -1.10746628 |
| F | 3.14486879  | 0.14944194  | -0.39507698 |
| F | 4.42661820  | -0.95362838 | 0.96975672  |

#### TS-S19

|   |             |             |             |
|---|-------------|-------------|-------------|
| C | -4.43641769 | -1.62109259 | -0.42627828 |
| C | -3.55799741 | -2.77521839 | 0.08783974  |
| C | -2.12372271 | -2.77314010 | -0.44749409 |
| C | -1.14472802 | -1.71345846 | 0.17245144  |
| C | -1.82618726 | -0.46440565 | 0.19048530  |
| C | -4.22771424 | -0.25754336 | 0.23126056  |
| H | -1.64298720 | -3.72913471 | -0.23005252 |
| H | -3.55467767 | -2.79378008 | 1.18400482  |
| H | -4.01670221 | -3.71355103 | -0.23318662 |
| H | -4.30402743 | -1.52208028 | -1.50876338 |
| H | -5.48582954 | -1.88009927 | -0.26512347 |
| H | -0.82668680 | -1.99064396 | 1.18103091  |
| H | -4.47845739 | -0.29499480 | 1.29570750  |
| H | -4.87013235 | 0.49729446  | -0.22809430 |
| H | -2.12928706 | -2.64040083 | -1.53120988 |
| C | -2.82074394 | 0.34518278  | 0.14120560  |
| C | -2.72644401 | 1.86539721  | 0.05975675  |
| C | -0.32246454 | 1.48394481  | -0.09125675 |
| H | -0.07171648 | 1.14584055  | -1.09683940 |
| H | 0.54230993  | 1.95653349  | 0.37282715  |
| H | -0.47409901 | 0.59216716  | 0.57226687  |
| C | -1.23617446 | 3.79291375  | -0.05899652 |
| H | -0.68927538 | 4.05945355  | -0.96508084 |

|   |             |             |             |
|---|-------------|-------------|-------------|
| H | -2.19816691 | 4.29769477  | -0.05052605 |
| H | -0.65387824 | 4.09207426  | 0.81517414  |
| O | -3.74706302 | 2.53240108  | 0.07794453  |
| N | -1.46844909 | 2.34744420  | -0.03074604 |
| H | -0.24900352 | -1.64667628 | -0.46062254 |
| O | 1.65697513  | -0.40014151 | 1.37325819  |
| S | 2.44843133  | -0.92165811 | 0.23819246  |
| O | 1.67499640  | -1.04426081 | -1.02135861 |
| O | 3.33154005  | -2.05726212 | 0.54645258  |
| C | 3.64378034  | 0.48099766  | -0.13787985 |
| F | 4.42449654  | 0.17890405  | -1.18556418 |
| F | 2.97556356  | 1.61267592  | -0.43095569 |
| F | 4.43484169  | 0.73053397  | 0.91639683  |

**S20**

|   |             |             |             |
|---|-------------|-------------|-------------|
| C | 2.00491164  | 1.71949621  | 0.51428751  |
| C | 3.38774788  | 1.10808376  | 0.26006959  |
| C | 3.48119617  | -0.41701623 | 0.37883887  |
| C | 2.64189689  | -1.19708955 | -0.65854176 |
| C | 1.17837987  | -1.21055139 | -0.35451167 |
| C | 0.92320386  | 1.29662410  | -0.49577615 |
| H | 4.52580840  | -0.71231050 | 0.24654822  |
| H | 3.72326648  | 1.40345809  | -0.74217127 |
| H | 4.09893294  | 1.55254530  | 0.96365175  |
| H | 1.66595138  | 1.47460152  | 1.52685351  |
| H | 2.09909675  | 2.80867408  | 0.47164786  |
| H | 2.79938053  | -0.74613349 | -1.64713401 |
| H | 1.33012464  | 1.36812581  | -1.51131497 |
| H | 0.08533975  | 1.99165127  | -0.44211971 |
| H | 3.19177370  | -0.73477627 | 1.38610795  |
| C | 0.40439133  | -0.10782412 | -0.28674323 |
| C | -0.97151194 | -0.22422573 | 0.17940662  |
| C | -1.70588881 | -2.12145155 | -1.15229921 |
| H | -2.34538015 | -2.97747840 | -1.30374637 |
| H | -1.15884313 | -1.69639636 | -1.98126653 |
| C | -2.41078455 | -2.06005486 | 1.16266658  |
| H | -3.04347592 | -2.88381024 | 0.84606683  |
| H | -1.68701813 | -2.41138224 | 1.89629530  |
| H | -3.00719850 | -1.24640206 | 1.56750270  |
| O | -1.63906231 | 0.63018037  | 0.69907851  |
| H | 0.74398935  | -2.17247657 | -0.12341629 |
| N | -1.66320833 | -1.55494440 | -0.00335955 |
| H | 2.99753069  | -2.22655187 | -0.71665698 |
| O | 0.04015071  | -4.13784580 | 0.98979887  |
| S | 0.11382031  | -4.89182105 | -0.27734082 |
| O | 1.24425373  | -5.81722393 | -0.42008944 |
| O | -0.16573184 | -4.05486106 | -1.47642658 |
| C | -1.39158352 | -6.01595826 | -0.20214013 |
| F | -1.46779611 | -6.79379810 | -1.28943217 |
| F | -1.35128676 | -6.80264610 | 0.88006868  |
| F | -2.52049438 | -5.27819713 | -0.13962397 |

**TS-S21**

|   |             |             |             |
|---|-------------|-------------|-------------|
| C | -2.21892022 | 0.44786850  | -1.31482932 |
| C | -3.33825705 | 0.23368324  | -0.28908007 |
| C | -3.17443145 | -0.97225462 | 0.64112941  |
| C | -1.95556904 | -0.87979676 | 1.58936150  |

|   |             |             |             |
|---|-------------|-------------|-------------|
| C | -0.67219298 | -1.14498709 | 0.86309591  |
| C | -0.84625907 | 0.82797024  | -0.72201695 |
| H | -4.06678934 | -1.05508971 | 1.26728139  |
| H | -3.44358726 | 1.14271973  | 0.31623139  |
| H | -4.27983498 | 0.11809870  | -0.83429478 |
| H | -2.10204372 | -0.44556733 | -1.93594471 |
| H | -2.51253768 | 1.25927722  | -1.98571244 |
| H | -1.92932697 | 0.11249745  | 2.05192499  |
| H | -0.98276774 | 1.61541695  | 0.03493644  |
| H | -0.19881619 | 1.24515463  | -1.49407097 |
| H | -3.10374463 | -1.89772117 | 0.06298503  |
| C | -0.12165266 | -0.29467597 | -0.06853954 |
| C | 1.29666695  | -0.54288137 | -0.43181917 |
| C | 1.20557020  | -1.41608655 | 1.74071708  |
| H | -0.37961384 | -2.21091217 | 0.81317328  |
| H | 1.27326187  | -2.34736823 | 2.29239570  |
| H | 1.04037320  | -0.51273207 | 2.31083464  |
| C | 2.92518144  | -2.32418346 | 0.21967215  |
| H | 2.54703427  | -3.32935091 | 0.41016625  |
| H | 3.15405390  | -2.20419993 | -0.83579732 |
| H | 3.81468468  | -2.12503237 | 0.81547624  |
| O | 1.86708481  | -0.16855181 | -1.43279102 |
| N | 1.87131049  | -1.35964124 | 0.56294504  |
| H | -2.06090815 | -1.61767347 | 2.38607105  |
| O | -2.06840095 | -4.14233475 | -0.52116009 |
| S | -0.67765183 | -4.62550363 | -0.56905503 |
| O | -0.49136951 | -6.08067076 | -0.65357766 |
| O | 0.22898088  | -3.94271894 | 0.39607626  |
| C | -0.05029132 | -3.99078997 | -2.22486094 |
| F | 1.24675549  | -4.29142558 | -2.39280740 |
| F | -0.74196387 | -4.53007638 | -3.23767898 |
| F | -0.17753149 | -2.65253841 | -2.29808813 |

## S22

|   |             |             |             |
|---|-------------|-------------|-------------|
| C | 2.74551314  | -1.27892855 | 1.58894424  |
| C | 3.50227968  | -1.94047307 | 0.42957221  |
| C | 2.83201274  | -1.84511182 | -0.94743303 |
| C | 2.83697721  | -0.44819674 | -1.58831631 |
| C | 2.00979222  | 0.57532861  | -0.87482292 |
| C | 2.73114874  | 0.25602542  | 1.57176789  |
| H | 3.34888202  | -2.52496791 | -1.63221565 |
| H | 4.51288549  | -1.51549164 | 0.36877221  |
| H | 3.63218543  | -3.00118418 | 0.66832280  |
| H | 1.71306907  | -1.64730156 | 1.60554535  |
| H | 3.20594971  | -1.59959617 | 2.52907589  |
| H | 3.87338175  | -0.08768249 | -1.64308613 |
| H | 3.76715830  | 0.62042868  | 1.55044557  |
| H | 2.29764354  | 0.62901798  | 2.50346868  |
| H | 1.79801248  | -2.20145377 | -0.87436480 |
| C | 1.97072099  | 0.86606653  | 0.43632997  |
| C | 1.00793288  | 1.98470704  | 0.65002782  |
| C | 1.06960180  | 1.48487468  | -1.61977288 |
| H | 0.28831524  | 0.91540151  | -2.13979315 |
| H | 1.59803690  | 2.08265798  | -2.37377799 |
| C | -0.47902227 | 3.34559729  | -0.82035076 |
| H | -1.38501478 | 2.92030719  | -1.26311057 |
| H | -0.73314641 | 3.80402481  | 0.13439965  |

|   |             |             |             |
|---|-------------|-------------|-------------|
| H | -0.08827867 | 4.11573271  | -1.49228944 |
| O | 0.70606162  | 2.51736969  | 1.71972231  |
| N | 0.50981215  | 2.31941527  | -0.57845222 |
| H | 2.49058704  | -0.52758948 | -2.62325673 |

**TS-S23**

|   |             |             |             |
|---|-------------|-------------|-------------|
| C | 1.41032530  | 2.73129451  | -1.32874473 |
| C | 1.09625567  | 3.33759558  | 0.03795797  |
| C | 0.32063960  | 2.36190477  | 0.93758491  |
| C | 0.90825921  | 1.08711770  | 2.17826877  |
| C | 1.53101392  | 1.02575265  | 0.98287842  |
| C | 2.45952935  | 1.62357416  | -1.25105076 |
| H | -0.00491949 | 2.89434096  | 1.83263024  |
| H | 1.99507180  | 3.70191332  | 0.54121989  |
| H | 0.42437712  | 4.19212929  | -0.07912184 |
| H | 0.48535461  | 2.33709534  | -1.75759795 |
| H | 1.76645138  | 3.51518398  | -1.99972338 |
| H | 1.38291853  | 1.58878657  | 3.01668803  |
| H | -0.01789119 | 0.53276076  | 2.34142043  |
| H | 3.47241107  | 2.03858954  | -1.23357658 |
| H | 2.40798811  | 0.97185747  | -2.12739188 |
| H | -0.51382727 | 1.86872092  | 0.44890711  |
| C | 2.33521862  | 0.77912913  | -0.01087972 |
| C | 3.35499707  | -0.33560603 | 0.16946508  |
| O | 4.53382206  | -0.00375575 | 0.28428978  |
| C | 3.84572357  | -2.69498743 | 0.40986524  |
| H | 3.42895036  | -3.38028210 | 1.15076575  |
| H | 4.01677470  | -3.24361161 | -0.52067395 |
| H | 4.78826139  | -2.29275501 | 0.77000154  |
| C | 1.52310777  | -2.00443270 | -0.09156905 |
| H | 1.04895185  | -2.39349411 | 0.81303206  |
| H | 0.93597547  | -1.17226973 | -0.46616793 |
| H | 1.53255803  | -2.79340464 | -0.84653551 |
| O | -1.69923501 | -0.49288220 | 1.83692272  |
| S | -1.99256922 | -0.79147447 | 0.41476852  |
| O | -2.09288441 | -2.22094367 | 0.08282269  |
| O | -1.21626971 | 0.02907416  | -0.54191668 |
| C | -3.74584444 | -0.14874970 | 0.20340635  |
| F | -4.17503717 | -0.33727446 | -1.05385342 |
| F | -4.59131161 | -0.77804016 | 1.03324881  |
| F | -3.80228154 | 1.16770090  | 0.46953313  |
| N | 2.90188342  | -1.60204364 | 0.18794161  |

**S24**

|   |             |            |             |
|---|-------------|------------|-------------|
| C | -0.42146144 | 2.65611661 | 0.15158227  |
| C | -1.51258755 | 3.49554231 | 0.81882406  |
| C | -2.79350937 | 3.46505592 | -0.01826232 |
| C | -3.32823001 | 2.03475008 | -0.13672762 |
| C | -2.23753735 | 1.03021067 | -0.41530738 |
| C | -0.93214623 | 1.31426914 | -0.31585965 |
| H | -3.56017868 | 4.10983681 | 0.41830361  |
| H | -1.72211076 | 3.09199974 | 1.81623247  |
| H | -1.16384069 | 4.52202700 | 0.95581851  |
| H | -0.00290611 | 3.19479167 | -0.70924204 |
| H | 0.41718273  | 2.49687784 | 0.83778720  |
| H | -3.84599347 | 1.74400508 | 0.78713199  |
| H | -4.07758904 | 1.96645210 | -0.93167729 |

|   |             |             |             |
|---|-------------|-------------|-------------|
| H | -2.57850097 | 3.85450298  | -1.01942443 |
| C | -2.70503134 | -0.31962340 | -0.89779581 |
| C | -3.35601111 | -2.60670020 | -0.35964744 |
| H | -4.31005203 | -2.83464593 | 0.12422202  |
| H | -3.47914794 | -2.63425538 | -1.43834018 |
| H | -2.61580668 | -3.35179533 | -0.05782669 |
| O | -2.89815620 | -0.49712743 | -2.10536580 |
| C | 0.09881608  | 0.28762943  | -0.64610336 |
| H | -0.27170245 | -0.50861531 | -1.28564307 |
| N | -2.89991632 | -1.27973568 | 0.03671414  |
| C | -2.75881689 | -1.07021764 | 1.47321536  |
| H | -2.27372101 | -0.12018450 | 1.67686806  |
| H | -3.73997415 | -1.08609189 | 1.95766637  |
| H | -2.15061916 | -1.87023150 | 1.90110317  |
| H | 1.00107053  | 0.72612411  | -1.06977407 |
| O | 0.53534959  | -0.33222108 | 0.65551749  |
| S | 0.82593018  | -1.89378688 | 0.76242903  |
| O | 0.10893512  | -2.64225591 | -0.25355614 |
| O | 0.74437633  | -2.23980084 | 2.16566690  |
| C | 2.65128731  | -1.94172282 | 0.28830935  |
| F | 3.08063128  | -3.19937500 | 0.33555738  |
| F | 2.79569393  | -1.46686975 | -0.94994241 |
| F | 3.35824288  | -1.19599698 | 1.13149634  |

## S25

|   |             |             |             |
|---|-------------|-------------|-------------|
| C | -3.00304961 | -0.93889625 | -1.31825899 |
| C | -3.57772504 | -0.21193846 | -0.08879445 |
| C | -3.34484913 | -0.93081446 | 1.24282736  |
| C | -1.88137831 | -0.85295784 | 1.88359256  |
| C | -1.03613468 | -1.02845608 | 0.76768576  |
| C | -1.51458967 | -0.74220150 | -1.59040183 |
| H | -3.96452986 | -0.48669597 | 2.02348907  |
| H | -3.21410206 | 0.81901405  | -0.03936888 |
| H | -4.66073576 | -0.14755294 | -0.21430719 |
| H | -3.22082264 | -2.00837118 | -1.23587385 |
| H | -3.52428034 | -0.58787306 | -2.21173623 |
| H | -1.72353796 | 0.12822727  | 2.33776163  |
| H | -1.79660728 | -1.64346012 | 2.63007591  |
| H | -1.29858049 | 0.28308178  | -1.90139026 |
| H | -1.17740694 | -1.41151603 | -2.38444367 |
| H | -3.60299377 | -1.98604073 | 1.15216095  |
| C | -0.55775336 | -0.97704540 | -0.40737539 |
| C | 0.95673553  | -0.93115074 | -0.76009739 |
| C | 1.89592085  | -1.78832253 | 0.07874234  |
| C | 1.62866284  | -3.25739196 | -0.32904126 |
| H | 1.82302959  | -3.41072649 | -1.39211598 |
| H | 2.30005600  | -3.90358694 | 0.23978470  |
| H | 0.60167545  | -3.55796137 | -0.11265836 |
| C | 1.59797696  | -1.59020242 | 1.56402117  |
| H | 0.57467889  | -1.89840350 | 1.82211188  |
| H | 2.24052813  | -2.24664774 | 2.15524903  |
| H | 1.75657540  | -0.56112086 | 1.88456525  |
| C | 3.34405107  | -1.39322265 | -0.24383979 |
| H | 4.02364514  | -2.02453854 | 0.33095100  |
| H | 3.55703706  | -1.52905568 | -1.30455740 |
| H | 3.53295801  | -0.35049566 | 0.01580467  |
| O | 1.26494420  | -0.26439504 | -1.70573956 |



|    |             |            |             |
|----|-------------|------------|-------------|
| H  | 1.17294928  | 2.17846314 | -1.37037697 |
| C  | 0.93090669  | 2.78050307 | -0.50297861 |
| H  | 1.17192599  | 3.82776125 | -0.63619371 |
| Cl | -0.83789601 | 2.65361192 | -0.21634201 |
| Cl | 1.88509084  | 2.16233265 | 0.88336551  |

**TS-S26**

|    |             |             |             |
|----|-------------|-------------|-------------|
| C  | -3.02912340 | 0.62583387  | 1.31523427  |
| C  | -3.56032946 | -0.08538877 | 0.05814024  |
| C  | -3.35765211 | 0.69576876  | -1.24256288 |
| C  | -1.90105400 | 0.70615849  | -1.85885392 |
| C  | -1.01888778 | 0.92091486  | -0.75844792 |
| C  | -1.53389232 | 0.49594620  | 1.58987792  |
| H  | -3.96138613 | 0.25964298  | -2.04080845 |
| H  | -3.13823575 | -1.09184333 | -0.02743360 |
| H  | -4.63816988 | -0.21577788 | 0.17730033  |
| H  | -3.30028330 | 1.68535190  | 1.26852609  |
| H  | -3.53553985 | 0.21824991  | 2.19328710  |
| H  | -1.67976812 | -0.25840127 | -2.32435616 |
| H  | -1.84716022 | 1.49800222  | -2.60718463 |
| H  | -1.27101905 | -0.53098548 | 1.85719344  |
| H  | -1.24147859 | 1.13673231  | 2.42459884  |
| H  | -3.66998735 | 1.73232708  | -1.10847343 |
| C  | -0.58227517 | 0.84482194  | 0.43925545  |
| C  | 0.91534311  | 0.92118963  | 0.81757774  |
| C  | 1.79489979  | 1.80596597  | -0.06601093 |
| C  | 1.45283113  | 3.26887067  | 0.30746388  |
| H  | 1.63675783  | 3.45382951  | 1.36719899  |
| H  | 2.09241446  | 3.93580245  | -0.27382281 |
| H  | 0.41207882  | 3.51178488  | 0.08509685  |
| C  | 1.46724624  | 1.53454209  | -1.52211467 |
| H  | 0.35995320  | 1.55078365  | -1.68376440 |
| H  | 1.81731493  | 2.33693174  | -2.17375108 |
| H  | 1.83156925  | 0.57043181  | -1.87035631 |
| C  | 3.27023294  | 1.49957267  | 0.23237087  |
| H  | 3.90338370  | 2.13398965  | -0.38996631 |
| H  | 3.49647515  | 1.70107689  | 1.27988876  |
| H  | 3.50475644  | 0.45556766  | 0.02144004  |
| O  | 1.27345580  | 0.32677194  | 1.79373568  |
| H  | 1.27873739  | -2.17163183 | 1.38401914  |
| C  | 1.11664355  | -2.79962212 | 0.51600931  |
| H  | 1.43178401  | -3.82336042 | 0.67501406  |
| Cl | -0.64265336 | -2.81239571 | 0.15580979  |
| Cl | 2.07708111  | -2.12772193 | -0.84089527 |

**S27**

|   |             |             |             |
|---|-------------|-------------|-------------|
| C | -2.70535272 | -1.51432349 | 1.60932866  |
| C | -3.57392013 | -1.72357065 | 0.36194557  |
| C | -3.89294314 | -0.45614618 | -0.43600940 |
| C | -2.71057553 | 0.14251857  | -1.22797506 |
| C | -1.59964233 | 0.55541383  | -0.33852784 |
| C | -1.21959760 | -1.24365432 | 1.35129625  |
| H | -4.66488728 | -0.68104431 | -1.17617428 |
| H | -3.10416014 | -2.46544798 | -0.29512789 |
| H | -4.52480737 | -2.15782614 | 0.68201918  |
| H | -3.12065547 | -0.70202712 | 2.21542543  |
| H | -2.75737056 | -2.41657412 | 2.22382922  |

|    |             |             |             |
|----|-------------|-------------|-------------|
| H  | -2.31647945 | -0.59939683 | -1.93302846 |
| H  | -3.05496856 | 0.99362536  | -1.81720393 |
| H  | -0.79332100 | -2.05046245 | 0.74220215  |
| H  | -0.66614827 | -1.24182321 | 2.29197944  |
| H  | -4.30223170 | 0.31050518  | 0.22845903  |
| C  | -0.88847815 | 0.04611979  | 0.65111848  |
| C  | 0.36463057  | 0.77699981  | 1.05556360  |
| C  | 0.63643681  | 2.09244471  | 0.28796893  |
| C  | 0.22160994  | 3.25977547  | 1.20867057  |
| H  | 0.79364902  | 3.21914291  | 2.13558167  |
| H  | 0.42949700  | 4.20905111  | 0.71210083  |
| H  | -0.84162489 | 3.22186308  | 1.45732774  |
| C  | -0.16430944 | 2.06535415  | -0.96930061 |
| H  | -1.34680099 | 1.73468865  | -0.55648035 |
| H  | -0.58954284 | 3.00299001  | -1.33283399 |
| H  | 0.16874163  | 1.41492885  | -1.77092693 |
| C  | 2.13793193  | 2.16709411  | -0.06551116 |
| H  | 2.36007913  | 3.11748504  | -0.55217702 |
| H  | 2.71368416  | 2.09644045  | 0.85752279  |
| H  | 2.43541194  | 1.35131164  | -0.72407408 |
| O  | 1.09272595  | 0.36811745  | 1.92334984  |
| H  | 2.36661239  | -1.52227641 | 1.26097185  |
| C  | 2.83248221  | -1.89017778 | 0.35460324  |
| H  | 3.02627983  | -2.95535071 | 0.38035269  |
| Cl | 1.69209228  | -1.57894587 | -1.00579044 |
| Cl | 4.38896381  | -1.03713127 | 0.13946267  |

#### TS-S28

|   |             |             |             |
|---|-------------|-------------|-------------|
| C | 2.47983809  | 1.48086185  | 0.31276603  |
| C | 3.34552057  | 0.32614030  | -0.20474517 |
| C | 2.89675795  | -1.07492912 | 0.22176363  |
| C | 1.60260984  | -1.57833436 | -0.44428534 |
| C | 0.39964815  | -0.77863901 | -0.06975909 |
| C | 1.10148312  | 1.62997137  | -0.34720964 |
| H | 3.67789478  | -1.79363713 | -0.03781355 |
| H | 3.40568493  | 0.37487331  | -1.29879174 |
| H | 4.36373252  | 0.47655164  | 0.16403789  |
| H | 2.34898049  | 1.38824517  | 1.39612922  |
| H | 3.01143711  | 2.42016643  | 0.14284282  |
| H | 1.70972020  | -1.53322344 | -1.53483400 |
| H | 1.43742442  | -2.62471511 | -0.18215703 |
| H | 1.22088081  | 1.69400184  | -1.43887256 |
| H | 0.63013946  | 2.56602364  | -0.04385743 |
| H | 2.78109891  | -1.11330784 | 1.30947456  |
| C | 0.12448472  | 0.53478400  | -0.09014867 |
| C | -1.32838663 | 0.87306387  | 0.11710173  |
| C | -2.25572011 | -0.35758888 | 0.08627017  |
| C | -2.88452284 | -0.54852474 | 1.47943977  |
| H | -3.42861522 | 0.35276784  | 1.76164833  |
| H | -3.58297450 | -1.38661694 | 1.45925347  |
| H | -2.12649042 | -0.74426491 | 2.24210938  |
| C | -1.40891744 | -1.52932319 | -0.32250465 |
| H | -0.33037283 | -1.38228730 | 0.60052965  |
| H | -1.56206639 | -2.47528668 | 0.19767370  |
| H | -1.21493800 | -1.68352775 | -1.37917975 |
| C | -3.34137336 | -0.11077543 | -0.98614205 |
| H | -4.03079333 | -0.95513859 | -1.02168866 |

|    |             |            |             |
|----|-------------|------------|-------------|
| H  | -3.89519569 | 0.78950199 | -0.71749003 |
| H  | -2.90379009 | 0.02821010 | -1.97644985 |
| O  | -1.72437396 | 2.00179411 | 0.26086688  |
| H  | -2.24794620 | 3.42641554 | -1.50557817 |
| C  | -1.96155084 | 3.50521667 | -2.54605331 |
| H  | -1.81518842 | 2.53640287 | -3.00853835 |
| Cl | -3.27404606 | 4.34514076 | -3.43151740 |
| Cl | -0.40207322 | 4.38889626 | -2.62309916 |

**S29**

|    |             |             |             |
|----|-------------|-------------|-------------|
| C  | -2.01223054 | -2.45015096 | -0.21655676 |
| C  | -3.49966403 | -2.17945139 | 0.01248940  |
| C  | -3.82142282 | -1.01348565 | 0.95141171  |
| C  | -3.50920381 | 0.37549706  | 0.39110922  |
| C  | -2.02343851 | 0.74294898  | 0.28927222  |
| C  | -1.23687629 | -1.38667364 | -1.01170077 |
| H  | -4.88971186 | -1.04048543 | 1.18065241  |
| H  | -3.99581661 | -2.01985064 | -0.95199016 |
| H  | -3.93426257 | -3.09082117 | 0.43161970  |
| H  | -1.49789565 | -2.58508960 | 0.74002387  |
| H  | -1.89660971 | -3.38425455 | -0.76903057 |
| H  | -3.94937188 | 0.48922141  | -0.60542374 |
| H  | -3.96791051 | 1.13760875  | 1.02484946  |
| H  | -1.80969882 | -1.15388860 | -1.94775004 |
| H  | -0.26903271 | -1.73589586 | -1.37820226 |
| H  | -3.30091833 | -1.15310792 | 1.90597432  |
| C  | -1.11852104 | -0.04622251 | -0.51286738 |
| C  | 0.05547456  | 0.86056612  | -0.94353259 |
| C  | -0.19662900 | 2.26401744  | -0.42573285 |
| C  | 0.70025203  | 2.49015783  | 0.81773962  |
| H  | 1.75280252  | 2.37613566  | 0.55615151  |
| H  | 0.53346586  | 3.50567224  | 1.18093505  |
| H  | 0.47212580  | 1.79340702  | 1.62569882  |
| C  | -1.68918048 | 2.22570246  | -0.03439550 |
| H  | -1.91535114 | 2.87025569  | 0.81299532  |
| H  | -2.31589029 | 2.53567656  | -0.87355427 |
| C  | 0.13061768  | 3.30598321  | -1.50312673 |
| H  | -0.09145357 | 4.30434882  | -1.12164399 |
| H  | 1.18830096  | 3.26206176  | -1.76685590 |
| H  | -0.46079223 | 3.14123792  | -2.40533174 |
| O  | 0.96743178  | 0.44252261  | -1.61027864 |
| H  | -1.56077021 | 0.53092490  | 1.28830703  |
| H  | 2.31633301  | -1.10071733 | -0.43557913 |
| C  | 2.56456959  | -1.24180986 | 0.61050404  |
| H  | 2.99790333  | -2.21333155 | 0.81387392  |
| Cl | 3.72911020  | 0.01887832  | 1.09273142  |
| Cl | 1.02347429  | -1.14281511 | 1.54842496  |

**TS-S30**

|   |             |             |             |
|---|-------------|-------------|-------------|
| C | -2.17060372 | -2.35187285 | 1.20862386  |
| C | -3.13347980 | -2.56918708 | 0.04826197  |
| C | -3.91571621 | -1.28506638 | -0.28087156 |
| C | -3.56665085 | 0.37927235  | -1.47056019 |
| C | -2.75570706 | -0.15395850 | -0.49743890 |
| C | -1.04641386 | -1.38638047 | 0.83106961  |
| H | -4.55226873 | -1.48880584 | -1.15061389 |
| H | -2.61206490 | -2.92943863 | -0.84152898 |

|    |             |             |             |
|----|-------------|-------------|-------------|
| H  | -3.90078006 | -3.30695269 | 0.30007207  |
| H  | -2.72204051 | -1.96268095 | 2.06948860  |
| H  | -1.73806255 | -3.30723587 | 1.51083984  |
| H  | -3.36743793 | 0.20740794  | -2.52732561 |
| H  | -4.49559445 | 0.88214967  | -1.21437736 |
| H  | -0.28181638 | -1.89124021 | 0.22971662  |
| H  | -0.53097635 | -1.01691092 | 1.71932026  |
| H  | -4.54751643 | -0.91118379 | 0.52359405  |
| C  | -1.53522155 | -0.22739277 | 0.00706959  |
| C  | -0.51608592 | 0.85523212  | -0.32154364 |
| O  | 0.25917116  | 0.59830824  | -1.21747668 |
| C  | -0.51631600 | 2.15765884  | 0.46697465  |
| C  | 0.78748586  | 2.91988186  | 0.20476883  |
| H  | 0.91892503  | 3.13038666  | -0.85739465 |
| H  | 0.76369067  | 3.86857354  | 0.74496234  |
| H  | 1.65296758  | 2.35327466  | 0.54992707  |
| C  | -0.68210214 | 1.86857280  | 1.97120038  |
| H  | -1.60642301 | 1.32585803  | 2.18302533  |
| H  | 0.16132396  | 1.29562173  | 2.36109657  |
| H  | -0.72338009 | 2.81671118  | 2.51138672  |
| C  | -1.72126840 | 2.99592312  | -0.02864966 |
| H  | -1.67385328 | 3.16343686  | -1.10719928 |
| H  | -2.67451985 | 2.52774350  | 0.22120803  |
| H  | -1.69214695 | 3.96879319  | 0.46677931  |
| H  | 2.40130409  | -0.01659211 | -1.01562722 |
| C  | 3.22960352  | -0.22111760 | -0.34830926 |
| H  | 3.78775237  | -1.10829045 | -0.62115227 |
| Cl | 4.34716144  | 1.17841851  | -0.40034942 |
| Cl | 2.54461719  | -0.48570627 | 1.29311653  |

### S31

|   |             |             |             |
|---|-------------|-------------|-------------|
| C | 4.01581886  | -0.61827185 | 1.09726444  |
| C | 4.30167854  | -1.18808372 | -0.29294129 |
| C | 3.09561933  | -1.97907700 | -0.79656410 |
| C | 1.86712982  | -1.07506016 | -0.89881399 |
| C | 1.68863787  | -0.11254347 | 0.19871600  |
| C | 2.69279904  | 0.11882525  | 1.17175327  |
| H | 3.29011407  | -2.41618771 | -1.77656980 |
| H | 4.52740970  | -0.37396617 | -0.98978180 |
| H | 5.18598112  | -1.82507961 | -0.24870753 |
| H | 3.98420132  | -1.43298165 | 1.82828987  |
| H | 4.80987054  | 0.05998222  | 1.41456456  |
| H | 1.91794944  | -0.45050004 | -1.80987769 |
| H | 0.92742519  | -1.62617636 | -1.03323966 |
| H | 2.87758678  | -2.80413994 | -0.11238581 |
| C | 0.33288529  | 0.55250559  | 0.29432754  |
| O | -0.42696700 | -0.04659365 | 1.02738648  |
| C | 2.42832949  | 1.00161289  | 2.17938158  |
| H | 1.47834618  | 1.51065972  | 2.28019771  |
| H | 3.16975902  | 1.20552313  | 2.94420197  |
| C | -0.00758571 | 1.79283661  | -0.50933545 |
| C | -0.48331622 | 1.31517304  | -1.90766576 |
| H | -0.81381059 | 2.19326772  | -2.46611195 |
| H | 0.31561536  | 0.84290909  | -2.48121095 |
| H | -1.31940409 | 0.62075419  | -1.82907851 |
| C | -1.15358135 | 2.53611779  | 0.19418686  |
| H | -1.42620114 | 3.40990158  | -0.40065772 |

|    |             |             |             |
|----|-------------|-------------|-------------|
| H  | -2.03226073 | 1.89944295  | 0.29628637  |
| H  | -0.85592697 | 2.87863690  | 1.18770773  |
| C  | 1.22700974  | 2.69768956  | -0.67174948 |
| H  | 1.57206036  | 3.09389002  | 0.28560547  |
| H  | 2.06291523  | 2.17847476  | -1.14891483 |
| H  | 0.96238890  | 3.54388864  | -1.30769084 |
| H  | -2.26188752 | -1.45514979 | 0.85395137  |
| C  | -2.85530823 | -1.82770784 | 0.02896214  |
| H  | -3.52813699 | -2.62714822 | 0.31349633  |
| Cl | -3.83759233 | -0.46840439 | -0.60220795 |
| Cl | -1.72263034 | -2.47973507 | -1.20632458 |

**S32**

|    |             |             |             |
|----|-------------|-------------|-------------|
| C  | 2.13479309  | -1.39163845 | -0.26608968 |
| C  | 2.77443100  | -0.08435542 | 0.23544969  |
| C  | 2.37586313  | 1.16799862  | -0.54807454 |
| C  | 0.90511335  | 1.86019623  | -0.29565848 |
| C  | 0.16854541  | 0.69512387  | -0.16978732 |
| C  | 0.70659627  | -1.65169162 | 0.20740194  |
| H  | 3.01699208  | 2.00496939  | -0.26973624 |
| H  | 2.60101054  | 0.05567169  | 1.30735503  |
| H  | 3.85657346  | -0.16793767 | 0.11100866  |
| H  | 2.16145027  | -1.40816312 | -1.36014801 |
| H  | 2.74004630  | -2.23424797 | 0.07276422  |
| H  | 0.92629023  | 2.45880900  | 0.61600004  |
| H  | 0.68378893  | 2.45260666  | -1.18391134 |
| H  | 0.68201345  | -1.88511327 | 1.27650856  |
| H  | 0.26368116  | -2.49326557 | -0.32816362 |
| H  | 2.44391844  | 0.99272665  | -1.61986885 |
| C  | -0.26530765 | -0.49111702 | 0.02735949  |
| C  | -1.75316174 | -0.74359137 | 0.15195888  |
| C  | -3.87907091 | 0.30721767  | 0.12245540  |
| H  | -4.16242833 | -0.09692217 | 1.09260545  |
| H  | -4.22244332 | 1.33076820  | 0.01075503  |
| H  | -4.25515796 | -0.32170421 | -0.68211902 |
| O  | -2.20588543 | -1.84184476 | 0.32836868  |
| O  | -2.42767449 | 0.39054888  | 0.03475028  |
| H  | -2.53661545 | -3.13340158 | -1.71154298 |
| C  | -2.51479665 | -2.85701787 | -2.75890561 |
| H  | -2.45100533 | -3.71172661 | -3.42077067 |
| Cl | -4.02579576 | -1.97174219 | -3.13349453 |
| Cl | -1.05147643 | -1.84553777 | -3.02415866 |

**TS-S33**

|   |            |             |             |
|---|------------|-------------|-------------|
| C | 1.52203408 | -1.79852126 | -0.38040668 |
| C | 2.54520287 | -0.73544858 | 0.05096487  |
| C | 2.35444904 | 0.62990654  | -0.60897588 |
| C | 1.16430842 | 1.52686841  | -0.08168559 |
| C | 0.01825096 | 0.67806251  | -0.00755130 |
| C | 0.15511758 | -1.73111154 | 0.28937801  |
| H | 3.22927021 | 1.25850003  | -0.43082565 |
| H | 2.56446457 | -0.63609940 | 1.14202687  |
| H | 3.53789520 | -1.08509027 | -0.24161649 |
| H | 1.38982289 | -1.76360580 | -1.46605116 |
| H | 1.92162922 | -2.78864871 | -0.14980329 |
| H | 1.39005057 | 1.93758865  | 0.90625790  |
| H | 1.02621991 | 2.34530925  | -0.79128313 |

|    |             |             |             |
|----|-------------|-------------|-------------|
| H  | 0.23459820  | -1.90183379 | 1.36786993  |
| H  | -0.50690854 | -2.49524989 | -0.11899947 |
| H  | 2.23400402  | 0.51359483  | -1.68696302 |
| C  | -0.63058132 | -0.41831991 | 0.15088828  |
| C  | -2.14170356 | -0.53944278 | 0.24509687  |
| C  | -2.17383627 | 1.84462459  | 0.33613022  |
| H  | -1.22849697 | 1.80072322  | -0.27635213 |
| H  | -2.77896199 | 2.58783912  | -0.18065362 |
| H  | -1.94663448 | 2.12496281  | 1.36238250  |
| O  | -2.68179699 | -1.60574606 | 0.27557110  |
| O  | -2.83679940 | 0.60711661  | 0.26230242  |
| H  | -2.92537165 | -2.64531713 | -2.00817809 |
| C  | -2.23024640 | -2.73013700 | -2.83488072 |
| H  | -2.71580199 | -2.97354945 | -3.77174900 |
| Cl | -1.42069192 | -1.13556280 | -3.03318080 |
| Cl | -1.06464751 | -4.03471745 | -2.45095418 |

### S34

|    |             |             |             |
|----|-------------|-------------|-------------|
| C  | -2.01500557 | 1.46663960  | -0.08497478 |
| C  | -2.91187233 | 0.25589166  | -0.36137600 |
| C  | -2.20764214 | -0.98870345 | -0.90858524 |
| C  | -1.19145199 | -1.63830821 | 0.06647472  |
| C  | 0.10256585  | -0.90981393 | 0.14068383  |
| C  | -0.95741296 | 1.24382897  | 1.00819914  |
| H  | -2.96104464 | -1.74787113 | -1.13165794 |
| H  | -3.43735739 | -0.01378656 | 0.56267391  |
| H  | -3.68355576 | 0.55485584  | -1.07677130 |
| H  | -1.52055105 | 1.79113452  | -1.00599766 |
| H  | -2.64743143 | 2.29772479  | 0.23888790  |
| H  | -1.64166850 | -1.66604126 | 1.06773209  |
| H  | -1.00055534 | -2.66857412 | -0.23135825 |
| H  | -1.40993254 | 0.75636691  | 1.87829631  |
| H  | -0.57896558 | 2.20551686  | 1.35413294  |
| H  | -1.70624612 | -0.75883426 | -1.85393947 |
| C  | 0.21140947  | 0.37754078  | 0.54911188  |
| C  | 1.44506577  | 1.06264113  | 0.52840119  |
| C  | 3.88633210  | 0.24369332  | -0.19727280 |
| H  | 4.72053837  | -0.38734319 | -0.51314719 |
| H  | 4.06001645  | 1.30916476  | -0.00135556 |
| O  | 2.00346214  | 2.05564127  | 0.69289540  |
| H  | 0.99459900  | -1.43107226 | -0.17469810 |
| O  | 2.78311941  | -0.25258632 | -0.03863681 |
| H  | 2.57142647  | 3.07745478  | -2.63445457 |
| C  | 2.49367935  | 2.21368680  | -3.28342520 |
| H  | 2.40102649  | 2.48286414  | -4.32818512 |
| Cl | 3.99893595  | 1.24811541  | -3.10198207 |
| Cl | 1.03117232  | 1.29078154  | -2.81088675 |

### TS-S35

|   |             |             |             |
|---|-------------|-------------|-------------|
| C | 1.80774619  | -1.60921189 | -0.05672699 |
| C | 2.75926156  | -0.40931435 | -0.09103462 |
| C | 2.22443014  | 0.84649769  | -0.78402735 |
| C | 1.02245128  | 1.50252609  | -0.06126620 |
| C | -0.25020837 | 0.75209522  | -0.29026576 |
| C | 0.52543886  | -1.41523686 | 0.77746290  |
| H | 3.01897968  | 1.59519099  | -0.82318838 |
| H | 3.05073106  | -0.15354472 | 0.93460009  |

|    |             |             |             |
|----|-------------|-------------|-------------|
| H  | 3.67520989  | -0.71853862 | -0.60223371 |
| H  | 1.52868325  | -1.90199185 | -1.07256946 |
| H  | 2.33663794  | -2.46004569 | 0.37911653  |
| H  | 1.23357083  | 1.54446559  | 1.01226546  |
| H  | 0.89228747  | 2.52500341  | -0.41520276 |
| H  | 0.79011273  | -0.98657008 | 1.75648371  |
| H  | 0.05643816  | -2.37773795 | 0.98056398  |
| H  | 1.95165419  | 0.62328024  | -1.82039745 |
| C  | -0.49638485 | -0.51031939 | 0.17670658  |
| C  | -1.88970444 | -1.02183358 | 0.09566082  |
| C  | -2.33026047 | 1.20591516  | 0.43567992  |
| H  | -0.89084953 | 1.15732024  | -1.07553386 |
| H  | -2.64626820 | 2.11855919  | -0.05802786 |
| H  | -1.98593178 | 1.23491142  | 1.46194938  |
| O  | -2.30585945 | -2.12734027 | 0.13429207  |
| O  | -2.77632115 | 0.09720932  | -0.08469523 |
| H  | -2.29913771 | -3.25196721 | -2.27337982 |
| C  | -2.23393784 | -2.63947152 | -3.16459312 |
| H  | -2.22267649 | -3.22531989 | -4.07519565 |
| Cl | -3.66181518 | -1.56056642 | -3.20552816 |
| Cl | -0.69018288 | -1.71902853 | -3.08526510 |

### S36

|    |             |             |             |
|----|-------------|-------------|-------------|
| C  | -1.32132638 | -1.83188105 | 0.40076649  |
| C  | -2.40869475 | -0.87409407 | -0.09631047 |
| C  | -2.28581612 | 0.58002925  | 0.37084660  |
| C  | -1.09023275 | 1.35715067  | -0.18051365 |
| C  | 0.28421752  | 0.90806933  | 0.38418922  |
| C  | 0.07190954  | -1.62601165 | -0.19995825 |
| H  | -3.18720327 | 1.11696656  | 0.06448962  |
| H  | -2.44784200 | -0.90622491 | -1.19118458 |
| H  | -3.36910112 | -1.26098466 | 0.25306879  |
| H  | -1.22775059 | -1.78044806 | 1.49069703  |
| H  | -1.60990946 | -2.85677352 | 0.16287343  |
| H  | -1.04729479 | 1.29972298  | -1.27124933 |
| H  | -1.18504611 | 2.41252213  | 0.08348299  |
| H  | -0.00915886 | -1.54790869 | -1.31863050 |
| H  | 0.74854205  | -2.47747789 | -0.08162839 |
| H  | -2.26640068 | 0.61422774  | 1.46577449  |
| C  | 0.77666180  | -0.40385740 | 0.03500755  |
| C  | 2.27519028  | -0.29752706 | -0.22167492 |
| C  | 1.47443190  | 1.84679590  | 0.11636130  |
| H  | 1.72465814  | 2.48371092  | 0.96028156  |
| H  | 1.31703028  | 2.44988717  | -0.77707780 |
| O  | 3.01329066  | -1.21035805 | -0.46587926 |
| H  | 0.13618917  | 0.82359806  | 1.48110248  |
| O  | 2.61735663  | 0.98679910  | -0.13430937 |
| H  | 3.42947891  | -2.49423227 | 1.52895104  |
| C  | 2.81085567  | -2.74925667 | 2.38170878  |
| H  | 3.38650428  | -3.00117564 | 3.26385937  |
| Cl | 1.83097083  | -1.28738804 | 2.79190391  |
| Cl | 1.78517370  | -4.14324465 | 1.94597260  |

### TS-S37

|   |            |             |             |
|---|------------|-------------|-------------|
| C | 2.32664517 | -1.28000266 | -0.31749760 |
| C | 2.64619337 | -0.11125718 | 0.61332144  |
| C | 2.06774894 | 1.21797212  | 0.10858570  |

|    |             |             |             |
|----|-------------|-------------|-------------|
| C  | 0.43215609  | 2.00438427  | 0.46859853  |
| C  | 0.28598100  | 0.72769402  | 0.07144405  |
| C  | 0.85220211  | -1.67508522 | -0.29029883 |
| H  | 2.46615591  | 2.03055061  | 0.71859364  |
| H  | 2.32806389  | -0.30344351 | 1.64082040  |
| H  | 3.72599681  | 0.05662639  | 0.64129663  |
| H  | 2.62387842  | -1.01188146 | -1.33544379 |
| H  | 2.92987246  | -2.14254408 | -0.03026054 |
| H  | 0.37931456  | 2.25059645  | 1.52561124  |
| H  | 0.40522892  | 2.82532726  | -0.24087559 |
| H  | 0.63813819  | -2.32712364 | 0.56224505  |
| H  | 0.57433206  | -2.23915614 | -1.18265853 |
| H  | 2.24834934  | 1.41911815  | -0.94289048 |
| C  | -0.08015442 | -0.50485753 | -0.15185562 |
| C  | -1.55987831 | -0.79357503 | -0.16585972 |
| C  | -3.73404883 | 0.13968943  | -0.13773489 |
| H  | -4.03989026 | -0.40167932 | -1.03179961 |
| H  | -4.03761887 | -0.40273415 | 0.75589241  |
| H  | -4.13863556 | 1.14721469  | -0.13698977 |
| O  | -1.98949221 | -1.92220311 | -0.19218464 |
| O  | -2.29255233 | 0.31316351  | -0.14093504 |
| H  | -2.17059814 | -2.92144261 | 1.96544646  |
| C  | -2.15740691 | -2.55474964 | 2.98491758  |
| H  | -2.00070667 | -3.33685462 | 3.71734624  |
| Cl | -0.79374130 | -1.39003156 | 3.12296295  |
| Cl | -3.73917566 | -1.78401368 | 3.32046557  |

### S38

|    |             |             |             |
|----|-------------|-------------|-------------|
| C  | 2.51618283  | 2.16715343  | -1.08885427 |
| C  | 2.98530392  | 0.79584934  | -1.58065699 |
| C  | 2.55759044  | -0.29689907 | -0.60152128 |
| C  | 1.03610236  | -0.32939232 | -0.45911411 |
| C  | 0.37398902  | 0.98007193  | -0.42396384 |
| C  | 1.04335374  | 2.18489157  | -0.73461392 |
| H  | 2.89864034  | -1.27800561 | -0.93357098 |
| H  | 2.56094418  | 0.59203996  | -2.56953669 |
| H  | 4.07024783  | 0.80339876  | -1.69319615 |
| H  | 3.07844595  | 2.45041047  | -0.19272608 |
| H  | 2.70538364  | 2.93847800  | -1.83751776 |
| H  | 0.56769629  | -0.83248424 | -1.32902781 |
| H  | 0.68316205  | -0.93423764 | 0.38454392  |
| H  | 3.00461764  | -0.11590977 | 0.38033422  |
| C  | -1.06796793 | 0.98050934  | 0.00909668  |
| C  | -3.33046227 | 0.87720730  | -0.68490137 |
| H  | -3.82660412 | 0.89330133  | -1.64942629 |
| H  | -3.54629868 | -0.04232820 | -0.14623972 |
| H  | -3.59842492 | 1.74613998  | -0.08740157 |
| O  | -1.32393577 | 1.01147868  | 1.18931276  |
| O  | -1.90330893 | 0.92675453  | -1.00093426 |
| C  | 0.32108701  | 3.34582760  | -0.70306820 |
| H  | -0.72923981 | 3.37531699  | -0.43961750 |
| H  | 0.78785250  | 4.29515527  | -0.94165355 |
| H  | -1.80964704 | -0.86824861 | 2.56881107  |
| C  | -2.33830647 | -1.79426052 | 2.37968283  |
| H  | -2.11634172 | -2.56806759 | 3.10404386  |
| Cl | -4.09474508 | -1.45258222 | 2.44351209  |
| Cl | -1.82185682 | -2.39102759 | 0.76219567  |



**S39**

|    |             |             |             |
|----|-------------|-------------|-------------|
| C  | -2.79688716 | -0.61872935 | -1.12767945 |
| C  | -3.74490824 | 0.14311913  | -0.18495884 |
| C  | -3.27687531 | 0.19543398  | 1.27043184  |
| C  | -2.09508331 | 1.21285648  | 1.62935473  |
| C  | -1.19762271 | 1.06200800  | 0.55563505  |
| C  | -1.56157421 | 0.13181602  | -1.61632955 |
| H  | -4.08536219 | 0.54616779  | 1.91388450  |
| H  | -3.94867111 | 1.15112800  | -0.56219570 |
| H  | -4.70320785 | -0.38100711 | -0.17898721 |
| H  | -2.48537975 | -1.54824303 | -0.64328474 |
| H  | -3.34908693 | -0.90727940 | -2.02481918 |
| H  | -2.47702099 | 2.23295486  | 1.70231575  |
| H  | -1.66489974 | 0.89157452  | 2.58094620  |
| H  | -1.83832094 | 0.94953228  | -2.28875976 |
| H  | -0.88326024 | -0.53740424 | -2.14987019 |
| H  | -2.96733309 | -0.79478333 | 1.60449310  |
| C  | -0.64928129 | 0.78713380  | -0.55653693 |
| C  | 0.81199375  | 1.01708718  | -0.98339995 |
| C  | 1.08776009  | 2.46036047  | 1.00144470  |
| H  | 1.20191404  | 1.76410952  | 1.83652565  |
| H  | 1.68381731  | 3.34865606  | 1.20731048  |
| H  | 0.05297015  | 2.80756958  | 0.92378936  |
| C  | 2.95332915  | 2.06109526  | -0.58691298 |
| H  | 3.57661406  | 1.52013964  | 0.12957452  |
| H  | 3.13473515  | 1.67729302  | -1.58605699 |
| H  | 3.19470617  | 3.12342049  | -0.54857457 |
| O  | 1.21176431  | 0.40215370  | -1.95913135 |
| N  | 1.53711246  | 1.87904077  | -0.25138455 |
| H  | 2.12293939  | -1.61800600 | -1.00764741 |
| C  | 1.92829598  | -2.18709446 | -0.10645995 |
| H  | 2.52932980  | -3.08448744 | -0.02993828 |
| Cl | 2.31427996  | -1.14084118 | 1.30204863  |
| Cl | 0.20190329  | -2.67355600 | -0.12819392 |

**TS-S40**

|   |             |             |             |
|---|-------------|-------------|-------------|
| C | 2.22862825  | -1.71118722 | 1.02192209  |
| C | 3.50825359  | -1.16089139 | 0.37168187  |
| C | 3.31142527  | -0.63727385 | -1.05200943 |
| C | 2.63323366  | 0.77293838  | -1.20059236 |
| C | 1.47140259  | 0.77419063  | -0.35274750 |
| C | 1.26443066  | -0.68148593 | 1.60210884  |
| H | 4.27913077  | -0.50664572 | -1.54101369 |
| H | 3.96554365  | -0.39121079 | 1.00390922  |
| H | 4.23224421  | -1.97667012 | 0.31057110  |
| H | 1.69820430  | -2.33478150 | 0.29614678  |
| H | 2.50589175  | -2.36891774 | 1.84892918  |
| H | 3.32172827  | 1.56265660  | -0.88695027 |
| H | 2.37523606  | 0.91646446  | -2.25102272 |
| H | 1.71595170  | -0.17117976 | 2.46076730  |
| H | 0.34910018  | -1.16063417 | 1.95408332  |
| H | 2.73472097  | -1.35545384 | -1.63764907 |
| C | 0.78981148  | 0.44462661  | 0.68885145  |
| C | -0.49422684 | 1.14971415  | 1.12166977  |
| C | 0.11950236  | 2.77834709  | -0.56250159 |
| H | 0.53615537  | 1.87061356  | -1.11153440 |

|    |             |             |             |
|----|-------------|-------------|-------------|
| H  | -0.44282414 | 3.27514717  | -1.35480739 |
| H  | 0.94900497  | 3.39604580  | -0.21944793 |
| O  | -1.20507907 | 0.64842632  | 1.97229686  |
| N  | -0.74320558 | 2.31358386  | 0.47557803  |
| C  | -2.02552189 | 2.99690997  | 0.67260952  |
| H  | -2.48889317 | 2.59744573  | 1.57063775  |
| H  | -1.85055324 | 4.06557486  | 0.79219838  |
| H  | -2.67759476 | 2.82250385  | -0.18649136 |
| H  | -2.70855754 | -0.59115822 | 0.30035046  |
| C  | -2.55444307 | -1.06339647 | -0.66274375 |
| H  | -3.43350417 | -1.58469068 | -1.02104716 |
| Cl | -2.15265298 | 0.22049190  | -1.85610281 |
| Cl | -1.22976751 | -2.25695449 | -0.48749447 |

**S41**

|    |             |             |             |
|----|-------------|-------------|-------------|
| C  | 2.14479639  | 1.43618728  | 0.21623207  |
| C  | 3.13142410  | 0.28067684  | 0.41574005  |
| C  | 2.53167118  | -1.02709379 | 0.94205021  |
| C  | 1.51761947  | -1.70003666 | -0.01356739 |
| C  | 0.17583480  | -1.04245392 | -0.01678596 |
| C  | 1.05668023  | 1.17437620  | -0.84029851 |
| H  | 3.34304574  | -1.74029991 | 1.10964785  |
| H  | 3.63592101  | 0.07813968  | -0.53722619 |
| H  | 3.91087438  | 0.60601011  | 1.11159059  |
| H  | 1.67051997  | 1.69013200  | 1.16883379  |
| H  | 2.70874224  | 2.31861137  | -0.09886572 |
| H  | 1.92900237  | -1.67970526 | -1.03111106 |
| H  | 1.39721269  | -2.74818901 | 0.26171153  |
| H  | 1.51884093  | 0.74714379  | -1.73774235 |
| H  | 0.60641932  | 2.12039529  | -1.13934142 |
| H  | 2.05507409  | -0.85969651 | 1.91336501  |
| C  | -0.04114302 | 0.23922675  | -0.38326413 |
| C  | -1.35140942 | 0.84473228  | -0.20065311 |
| C  | -2.80130938 | -0.92502634 | -1.02192744 |
| H  | -3.70184484 | -1.52656805 | -0.97780202 |
| H  | -2.12171652 | -1.01468261 | -1.86058379 |
| C  | -3.42574995 | 0.12360548  | 1.07455197  |
| H  | -4.29401323 | -0.52374277 | 0.99140654  |
| H  | -2.85880215 | -0.09629715 | 1.97827569  |
| H  | -3.71907504 | 1.17133550  | 1.07861602  |
| O  | -1.62521149 | 2.00968192  | -0.12016393 |
| H  | -0.64854985 | -1.63705272 | 0.35857011  |
| N  | -2.54176205 | -0.10030150 | -0.08431430 |
| H  | -0.74839799 | 3.17782710  | 1.84213094  |
| C  | -0.94659335 | 2.95953322  | 2.88448450  |
| H  | -0.36598495 | 3.57250590  | 3.56271150  |
| Cl | -2.68302730 | 3.27010388  | 3.19421832  |
| Cl | -0.49949723 | 1.24190261  | 3.17729286  |

**TS-S42**

|   |             |             |             |
|---|-------------|-------------|-------------|
| C | -2.27842198 | 1.44997959  | 0.05075625  |
| C | -3.10040726 | 0.16706142  | -0.09397816 |
| C | -2.48981957 | -0.90357218 | -1.00109804 |
| C | -1.21017087 | -1.55346712 | -0.43168755 |
| C | 0.00482151  | -0.67984028 | -0.51800742 |
| C | -0.93330264 | 1.31559458  | 0.78487906  |
| H | -3.21870862 | -1.70531913 | -1.14237761 |

|    |             |             |             |
|----|-------------|-------------|-------------|
| H  | -3.28317452 | -0.26422306 | 0.89791737  |
| H  | -4.08077456 | 0.43989530  | -0.49474510 |
| H  | -2.09990663 | 1.88864921  | -0.93366124 |
| H  | -2.86475778 | 2.18006816  | 0.61414248  |
| H  | -1.39080258 | -1.81416363 | 0.61680209  |
| H  | -1.00078632 | -2.48086189 | -0.96559797 |
| H  | -1.09776789 | 0.81935950  | 1.75694825  |
| H  | -0.53358287 | 2.30341846  | 1.02011208  |
| H  | -2.28320933 | -0.48773699 | -1.99242455 |
| C  | 0.14491585  | 0.54504889  | 0.11093404  |
| C  | 1.53749242  | 1.07346797  | 0.19953019  |
| C  | 1.83586583  | -1.22928746 | 0.46173877  |
| H  | 0.67832327  | -0.89193336 | -1.34764683 |
| H  | 2.30774547  | -2.09252533 | 0.00221240  |
| H  | 1.26551618  | -1.40389390 | 1.36221816  |
| C  | 3.82141323  | 0.10655866  | -0.16081760 |
| H  | 4.09696012  | -0.75226412 | -0.77338756 |
| H  | 3.94363902  | 1.02756618  | -0.72242253 |
| H  | 4.44355781  | 0.13031900  | 0.73405402  |
| O  | 1.88205783  | 2.23307637  | 0.20024302  |
| N  | 2.41327709  | -0.02563928 | 0.22916016  |
| H  | 2.06663425  | 2.88432589  | -2.26617734 |
| C  | 1.60675280  | 2.40702472  | -3.12318107 |
| H  | 1.81531949  | 2.91727912  | -4.05514198 |
| Cl | 2.26973216  | 0.73931796  | -3.25094915 |
| Cl | -0.16487488 | 2.40448996  | -2.86713957 |

#### S43

|   |             |             |             |
|---|-------------|-------------|-------------|
| C | 1.88831230  | 1.77105421  | 0.32519835  |
| C | 2.84366050  | 0.68140415  | -0.17195237 |
| C | 2.55417043  | -0.73735507 | 0.32802811  |
| C | 1.25230694  | -1.36426682 | -0.17340375 |
| C | -0.03574617 | -0.73916182 | 0.41561605  |
| C | 0.47526383  | 1.73179071  | -0.26287348 |
| H | 3.37223216  | -1.38844754 | 0.00852713  |
| H | 2.86112267  | 0.68653629  | -1.26811350 |
| H | 3.85206145  | 0.95462518  | 0.14951064  |
| H | 1.80701986  | 1.74338493  | 1.41679441  |
| H | 2.30015547  | 2.74983017  | 0.07259347  |
| H | 1.19246129  | -1.31976910 | -1.26449238 |
| H | 1.22685818  | -2.41992113 | 0.10563236  |
| H | 0.53120586  | 1.65795095  | -1.37766588 |
| H | -0.09037166 | 2.65856242  | -0.12436802 |
| H | 2.56392853  | -0.75018432 | 1.42412105  |
| C | -0.38354147 | 0.61175005  | 0.01165514  |
| C | -1.86583534 | 0.71627312  | -0.20326491 |
| C | -1.33134940 | -1.54796684 | 0.22931327  |
| H | -1.60709883 | -2.11957135 | 1.11743006  |
| H | -1.23617470 | -2.24192155 | -0.61056984 |
| C | -3.74981534 | -0.87518197 | -0.16326161 |
| H | -4.10753378 | -1.25500959 | 0.79712821  |
| H | -4.29803867 | 0.02457953  | -0.43191789 |
| H | -3.89490474 | -1.64314506 | -0.92551794 |
| O | -2.47622790 | 1.74431741  | -0.45371628 |
| H | 0.14285850  | -0.62639838 | 1.50378788  |
| N | -2.34103688 | -0.54478274 | -0.06123382 |
| H | -2.54151417 | 3.10352749  | 1.43009573  |

|    |             |            |            |
|----|-------------|------------|------------|
| C  | -1.95955366 | 3.30821314 | 2.32149377 |
| H  | -2.55163781 | 3.68292544 | 3.14711018 |
| Cl | -1.22895251 | 1.74474720 | 2.85052996 |
| Cl | -0.71469452 | 4.52602111 | 1.91600387 |

**TS-S44**

|    |             |             |             |
|----|-------------|-------------|-------------|
| C  | -2.42748471 | -1.41238187 | 0.44397876  |
| C  | -3.03384426 | -0.29290412 | -0.39838119 |
| C  | -2.48332845 | 1.09029876  | -0.00606366 |
| C  | -1.01857801 | 2.08055853  | -0.66654745 |
| C  | -0.76095109 | 0.80595717  | -0.29363559 |
| C  | -0.94926190 | -1.64159044 | 0.13417630  |
| H  | -3.04823997 | 1.84782217  | -0.55446321 |
| H  | -2.89714150 | -0.46454770 | -1.46855639 |
| H  | -4.10906192 | -0.22103235 | -0.21619468 |
| H  | -2.55672375 | -1.16843968 | 1.50232315  |
| H  | -2.97800992 | -2.33719006 | 0.26387540  |
| H  | -1.18418896 | 2.32736657  | -1.71171878 |
| H  | -0.97658151 | 2.90125258  | 0.04282185  |
| H  | -0.82423607 | -2.28724655 | -0.74034723 |
| H  | -0.44384721 | -2.15006096 | 0.95873288  |
| H  | -2.51760318 | 1.31056173  | 1.05682471  |
| C  | -0.20870853 | -0.37195496 | -0.18397170 |
| C  | 1.24902491  | -0.50993464 | -0.59707554 |
| C  | 3.59718258  | -0.10664637 | -0.19369845 |
| H  | 4.06891067  | -0.93356950 | 0.34433041  |
| H  | 3.65986217  | -0.29010977 | -1.26248776 |
| H  | 4.11461417  | 0.82141549  | 0.05307933  |
| O  | 1.46388961  | -1.10109702 | -1.65484066 |
| N  | 2.19397335  | 0.01569286  | 0.19869394  |
| C  | 1.96165618  | 0.50412699  | 1.55583110  |
| H  | 2.29780469  | 1.53974810  | 1.64258031  |
| H  | 0.90821036  | 0.44972995  | 1.81188668  |
| H  | 2.52593781  | -0.11132243 | 2.26093203  |
| H  | 2.22777069  | -3.17219509 | -1.31673544 |
| C  | 2.21550142  | -4.03305116 | -0.65827007 |
| H  | 3.04582630  | -4.71077824 | -0.81382523 |
| Cl | 2.31611027  | -3.41903242 | 1.03007279  |
| Cl | 0.69641818  | -4.93783203 | -0.95960807 |

**S45**

|   |             |             |             |
|---|-------------|-------------|-------------|
| C | -2.49252053 | 1.18039520  | -0.14520063 |
| C | -3.10202863 | -0.09610856 | 0.43972683  |
| C | -2.57432019 | -1.32243341 | -0.30382274 |
| C | -1.05340241 | -1.41744163 | -0.18001629 |
| C | -0.32574813 | -0.14176928 | -0.31140412 |
| C | -0.98204249 | 1.11880950  | -0.23973637 |
| H | -3.01579350 | -2.24028521 | 0.08671042  |
| H | -2.85464316 | -0.17347541 | 1.50433098  |
| H | -4.18939951 | -0.04396448 | 0.36733226  |
| H | -2.88077466 | 1.33720806  | -1.15759098 |
| H | -2.77482173 | 2.05703025  | 0.43999251  |
| H | -0.77080608 | -1.78478383 | 0.82505122  |
| H | -0.61343043 | -2.15676576 | -0.85490764 |
| H | -2.84210138 | -1.26073017 | -1.36276904 |
| C | 1.12085118  | -0.23393388 | -0.67240282 |
| C | 3.48624558  | -0.40544033 | -0.21361233 |

|    |             |             |             |
|----|-------------|-------------|-------------|
| H  | 3.88625956  | -1.34365937 | 0.17421247  |
| H  | 3.52313092  | -0.41436344 | -1.29948430 |
| H  | 4.07703646  | 0.42847810  | 0.16852833  |
| O  | 1.21061031  | -0.30890834 | -1.90503875 |
| C  | -0.21246806 | 2.24274438  | -0.23646219 |
| H  | 0.86627599  | 2.20804165  | -0.32865818 |
| H  | -0.66437839 | 3.22332146  | -0.14018153 |
| N  | 2.09779297  | -0.25156574 | 0.22192592  |
| C  | 1.85822861  | -0.19885579 | 1.66266999  |
| H  | 0.80381984  | -0.02797739 | 1.87017796  |
| H  | 2.16364500  | -1.14063972 | 2.12242194  |
| H  | 2.43505743  | 0.61934805  | 2.09640254  |
| H  | 1.86830456  | -2.29435830 | -2.94544453 |
| C  | 1.63937074  | -3.33498634 | -2.75175493 |
| H  | 2.23179149  | -4.02505903 | -3.33950004 |
| Cl | 1.98199859  | -3.64999029 | -1.01515948 |
| Cl | -0.08853794 | -3.59901781 | -3.15563235 |

## X) References

- (1) Yates, P.; Garneau, F. X.; Lokensgard, J. P., Preparation and spectra of mercuribis ( $\alpha$ -diazo ketones). *Tetrahedron* **1975**, *31*, 1979-1983.
- (2) Du, H.; Rodriguez, J.; Bugaut, X.; Constantieux, T., Organocatalytic Enantio- and Diastereoselective Conjugate Addition to Nitroolefins: When  $\beta$ -Ketoamides Surpass  $\beta$ -Ketoesters. *Chemistry – A European Journal* **2014**, *20* (27), 8458-8466.
- (3) Bartlett, P. A.; Carruthers, N. I.; Winter, B. M.; Long, K. P.,  $\alpha$ -Diazophosphonic acids as potential photoaffinity labeling reagents: synthesis, stability, and photochemistry. *J. Org. Chem.* **1982**, *47* (7), 1284-1291.
- (4) Chen, D.-F.; Wu, P.-Y.; Gong, L.-Z., Rhodium/Chiral Urea Relay Catalysis Enables an Enantioselective Semipinacol Rearrangement/Michael Addition Cascade. *Org. Lett.* **2013**, *15* (15), 3958-3961.
- (5) Pellicciari, R.; Natalini, B.; Sadeghpour, B. M.; Marinozzi, M.; Snyder, J. P.; Williamson, B. L.; Kuethe, J. T.; Padwa, A., The reaction of  $\alpha$ -diazo- $\beta$ -hydroxy esters with boron trifluoride etherate: Generation and rearrangement of destabilized vinyl cations. A detailed experimental and theoretical study. *J. Am. Chem. Soc.* **1996**, *118* (1), 1-12.
- (6) Paquette, L. A.; Zon, G., Silver(I) ion-catalyzed rearrangements of strained  $\sigma$  bonds. XXII. Kinetic deuterium isotope and electronic effects in the silver(I) promoted type  $\gamma$  isomerization of 1-alkyltricyclo[4.1.0.0.2,7]heptanes. Mechanistic analysis of the formation of bicyclo[3.2.0]hept-6-enes. *J. Am. Chem. Soc.* **1974**, *96* (1), 224-233.
- (7) Takai, K.; Hotta, Y.; Oshima, K.; Nozaki, H., Wittig-type Reaction of Dimetallated Carbodianion Species as Produced by Zinc Reduction of gem-Polyhalogen Compounds in the Presence of Lewis Acids. *Bull. Chem. Soc. Jpn.* **1980**, *53* (6), 1698-1702.
- (8) Frisch, M. J. T., G. W.; Schlegel, H. B.; Scuseria, G. E.; Robb, M. A. C., J. R.; Scalmani, G.; Barone, V.; Mennucci, B.; Petersson, G. A. N., H.; Caricato, M.; Li, X.; Hratchian, H.; P.; Izmaylov, A. F. B., J.; Zheng, G.; Sonnenberg, J. L.; Hada, M.; Ehara, M. T., K.; Fukuda, R.; Hasegawa, J.; Ishida, M.; Nakajima, T.; Honda, Y. K., O.; Nakai, H.; Vreven, T.; Montgomery, J. A., Jr.; Peralta, J. E. O., F.; Bearpark, M.; Heyd, J. J.; Brothers, E.; Kudin, K. N.; Staroverov, V. N. K., R.; Normand, J.; Raghavachari, K.; Rendell, A. B., J. C.; Iyengar, S. S.; Tomasi, J.; Cossi, M.; Rega, N.; Millam, J. M. K., M.; Knox, J. E.; Cross, J. B.; Bakken, V.; Adamo, C. J., J.; Gomperts, R.; Stratmann, R. E.; Yazyev, O.; Austin, A. J. C., R.; Pomelli, C.; Ochterski, J. W.; Martin, R. L.; Morokuma, K. Z., V. G.; Voth, G. A.; Salvador, P.; Dannenberg, J. J. D., S.; Daniels, A. D.; Farkas, O.; Foresman, J. B. O., J. V.; Cioslowski, J.; Fox, D. J., ; *Gaussian 09, revision C.01*; Gaussian Inc.: Wallingford, CT, 2010.
- (9) Becke, A. D., Density-functional thermochemistry. III. The role of exact exchange. *J. Chem. Phys.* **1993**, *98* (7), 5648-5652.
- (10) Lee, C.; Yang, W.; Parr, R. G., Development of the Colle-Salvetti correlation-energy formula into a functional of the electron density. *Phys. Rev. B* **1988**, *37* (2), 785-789.
- (11) Grimme, S.; Antony, J.; Ehrlich, S.; Krieg, H., A consistent and accurate ab initio parametrization of density functional dispersion correction (DFT-D) for the 94 elements H-Pu. *J. Chem. Phys.* **2010**, *132* (15), 154104.
- (12) Tomasi, J.; Mennucci, B.; Cammi, R., Quantum mechanical continuum solvation models. *Chem. Rev.* **2005**, *105* (8), 2999-3093.
- (13) Cancès, E.; Mennucci, B., Comment on "Reaction field treatment of charge penetration" [J. Chem. Phys. 112, 5558 (2000)]. *J. Chem. Phys.* **2001**, *114* (10), 4744-4745.
- (14) Chipman, D. M., Reaction field treatment of charge penetration. *J. Chem. Phys.* **2000**, *112* (13), 5558-5565.
- (15) Legault, C. Y., CYLView. *CYLView* **2009**, *1.0b*, <http://www.cylview.org>.

<sup>1</sup>H NMR (CDCl<sub>3</sub>, with 0.03% v/v TMS, 500 MHz)

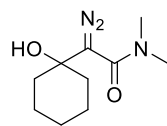

**28**

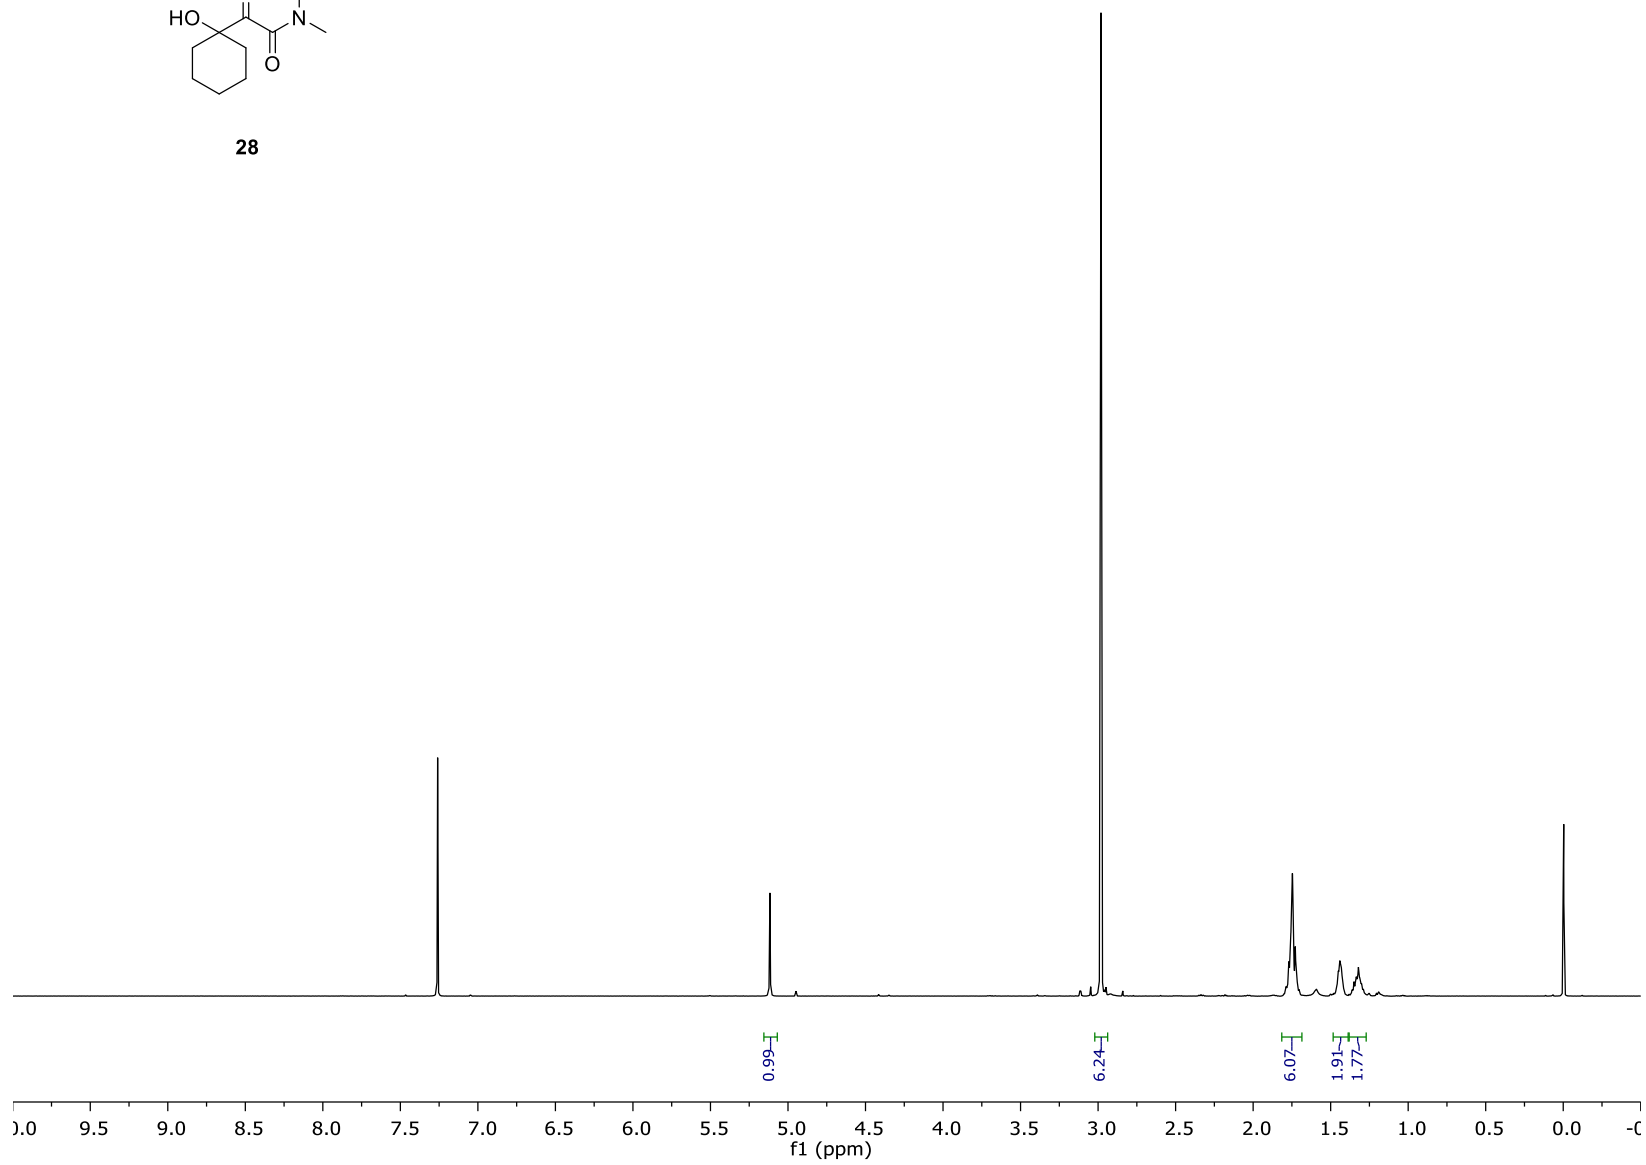

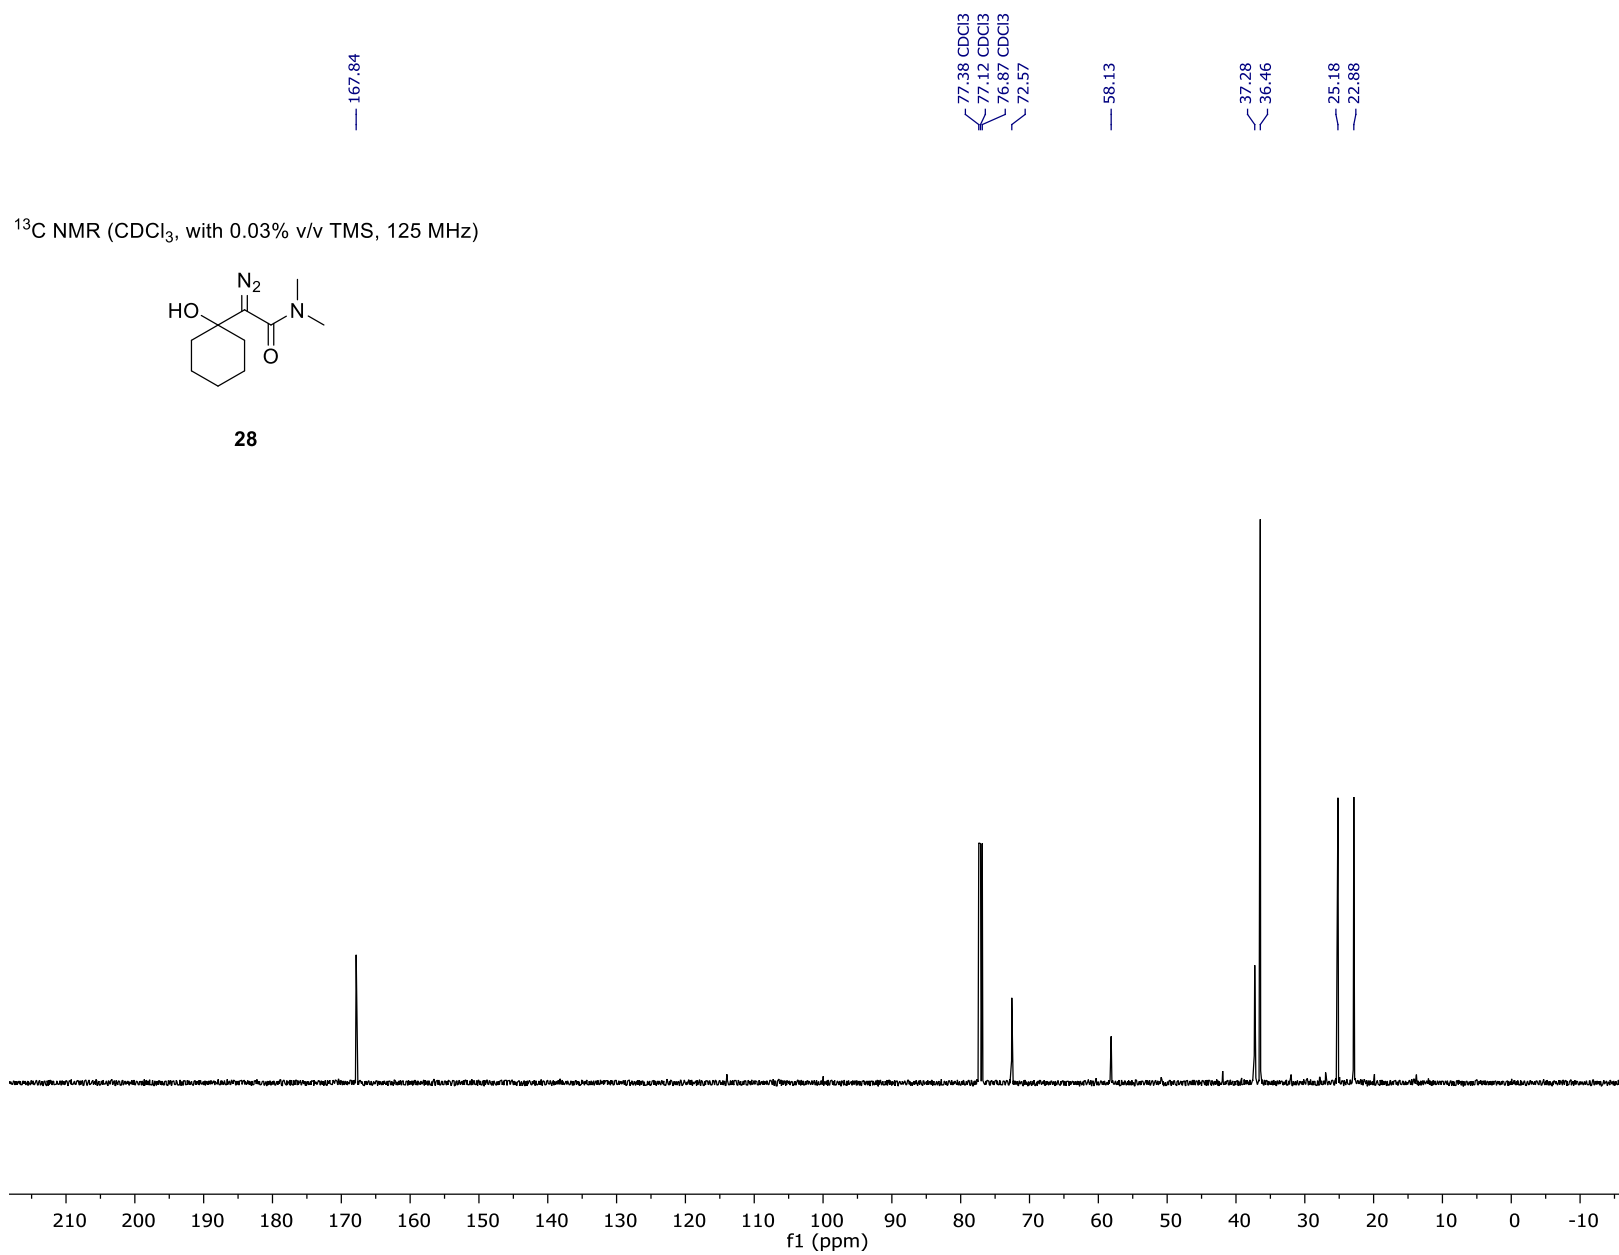

<sup>1</sup>H NMR (CDCl<sub>3</sub>, with 0.03% v/v TMS, 500 MHz)

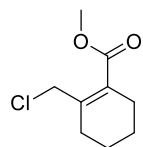

**27**

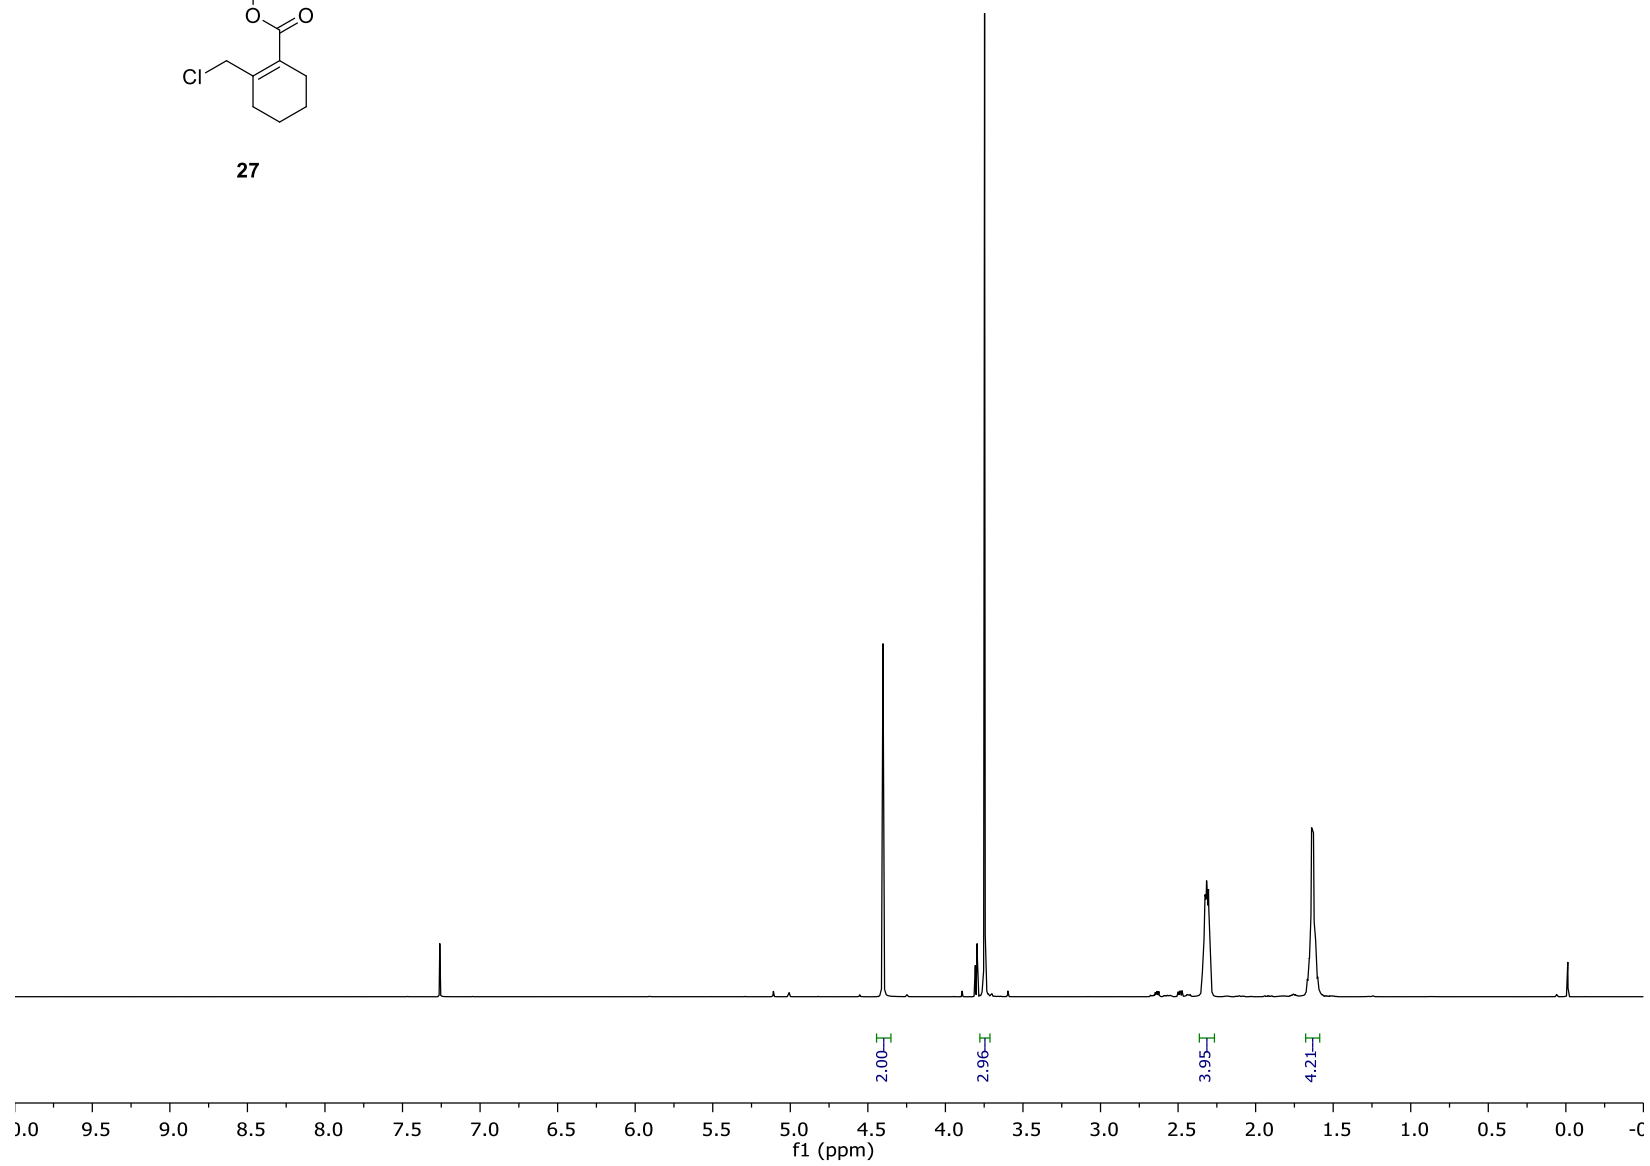

S64



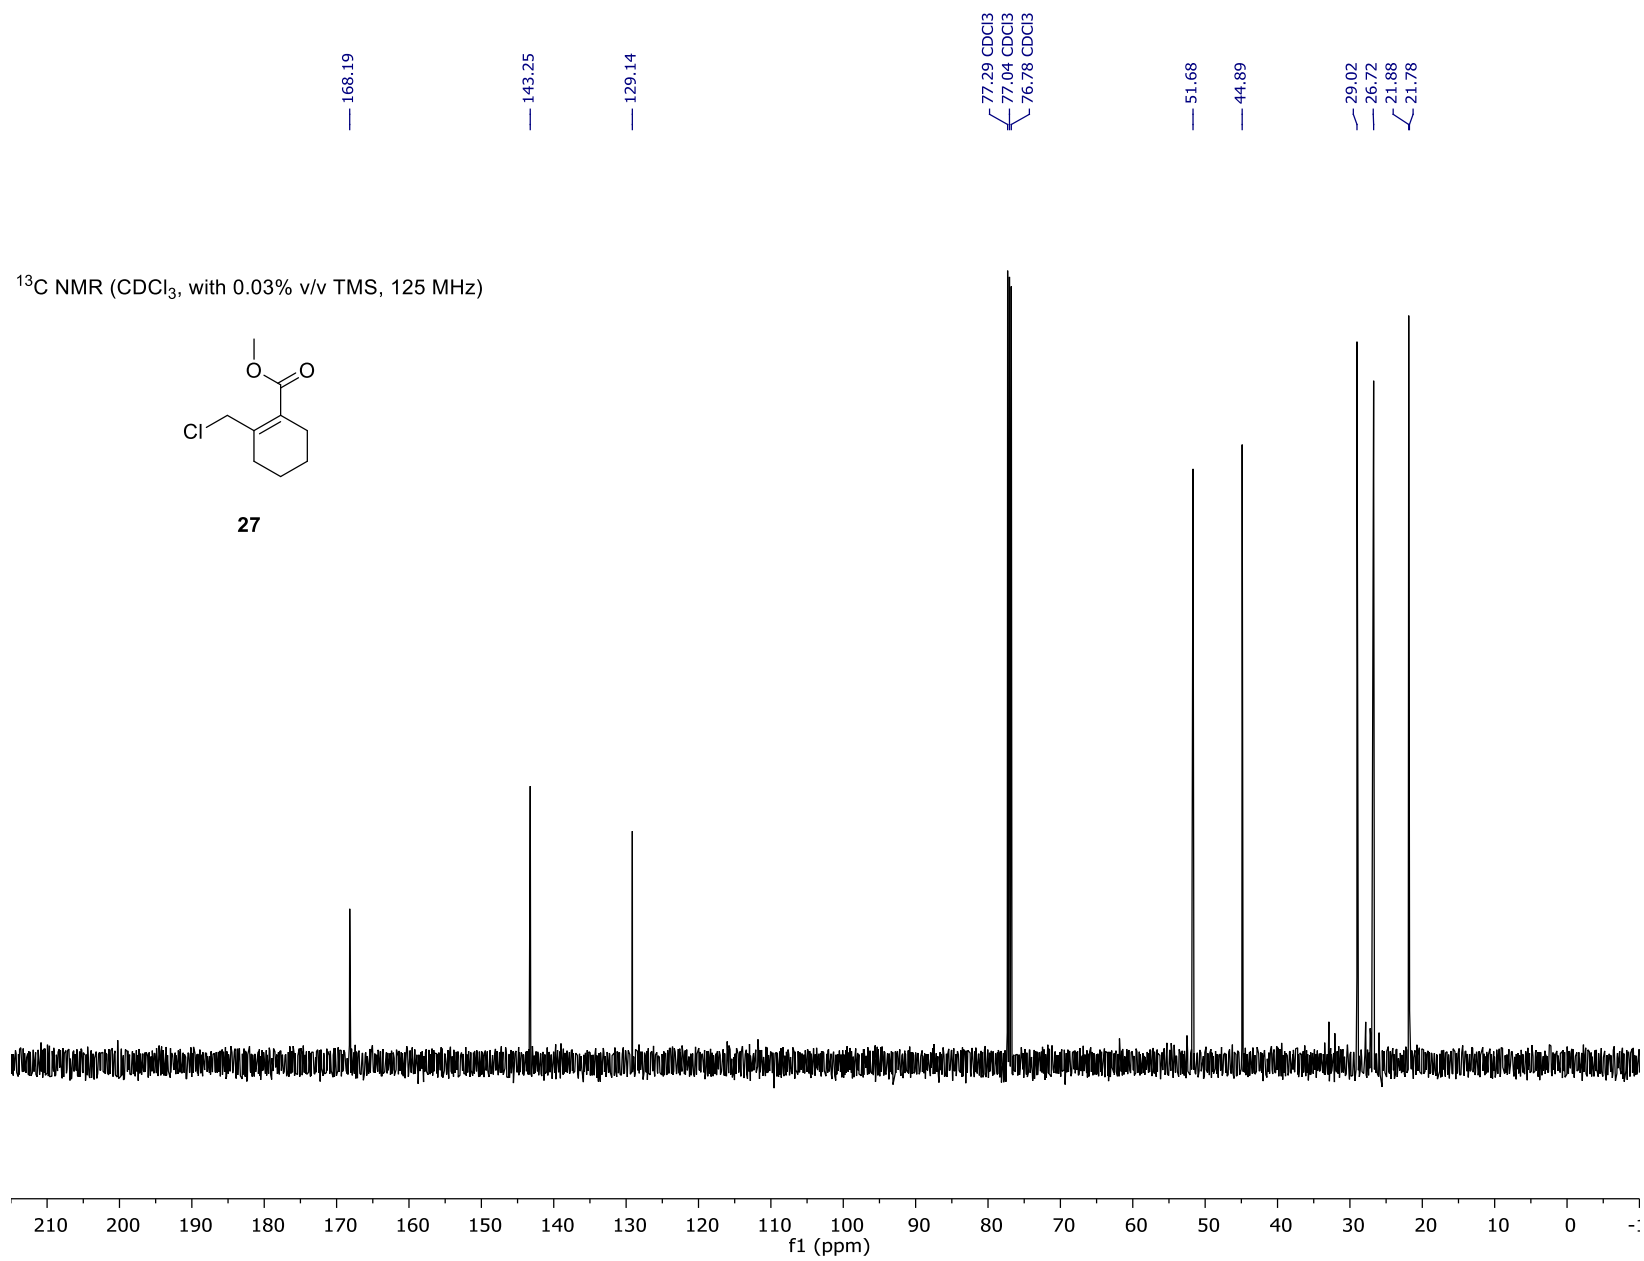

<sup>1</sup>H NMR (CDCl<sub>3</sub>, with 0.03% v/v TMS, 500 MHz)

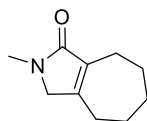

**29**

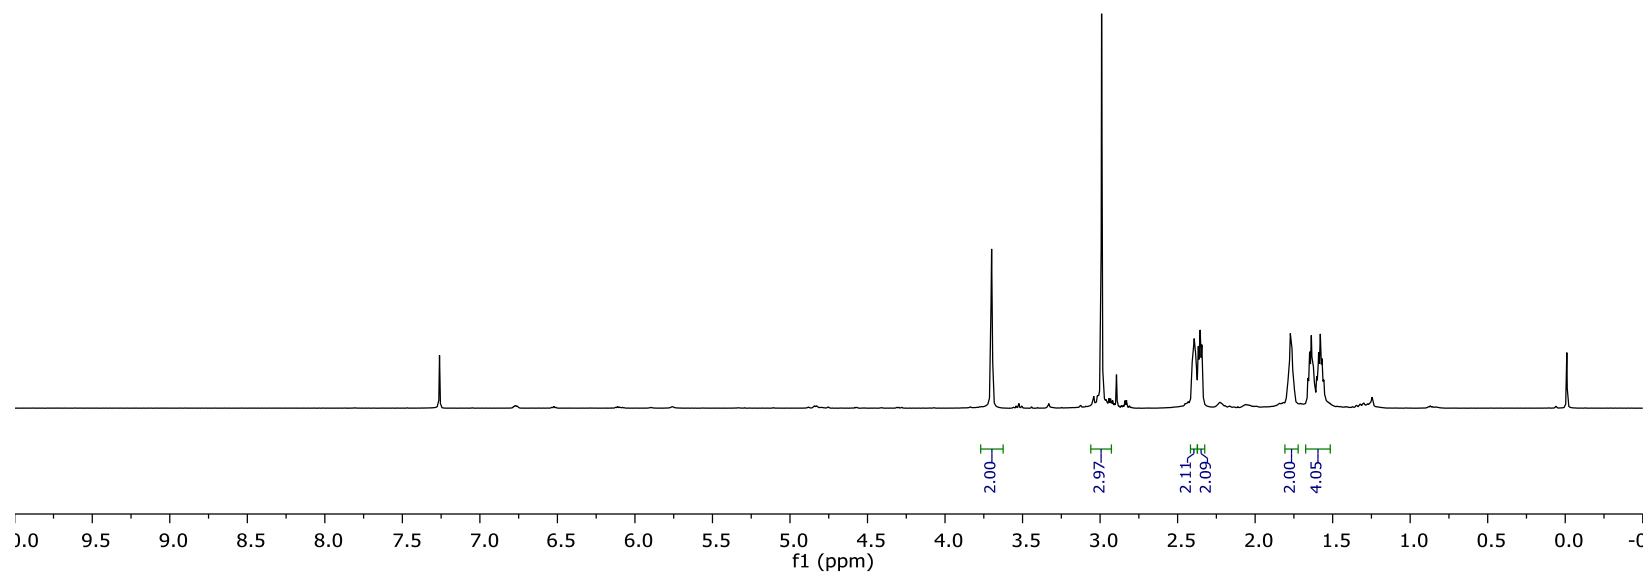

$^{13}\text{C}$  NMR ( $\text{CDCl}_3$ , with 0.03% v/v TMS, 125 MHz)

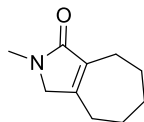

**29**

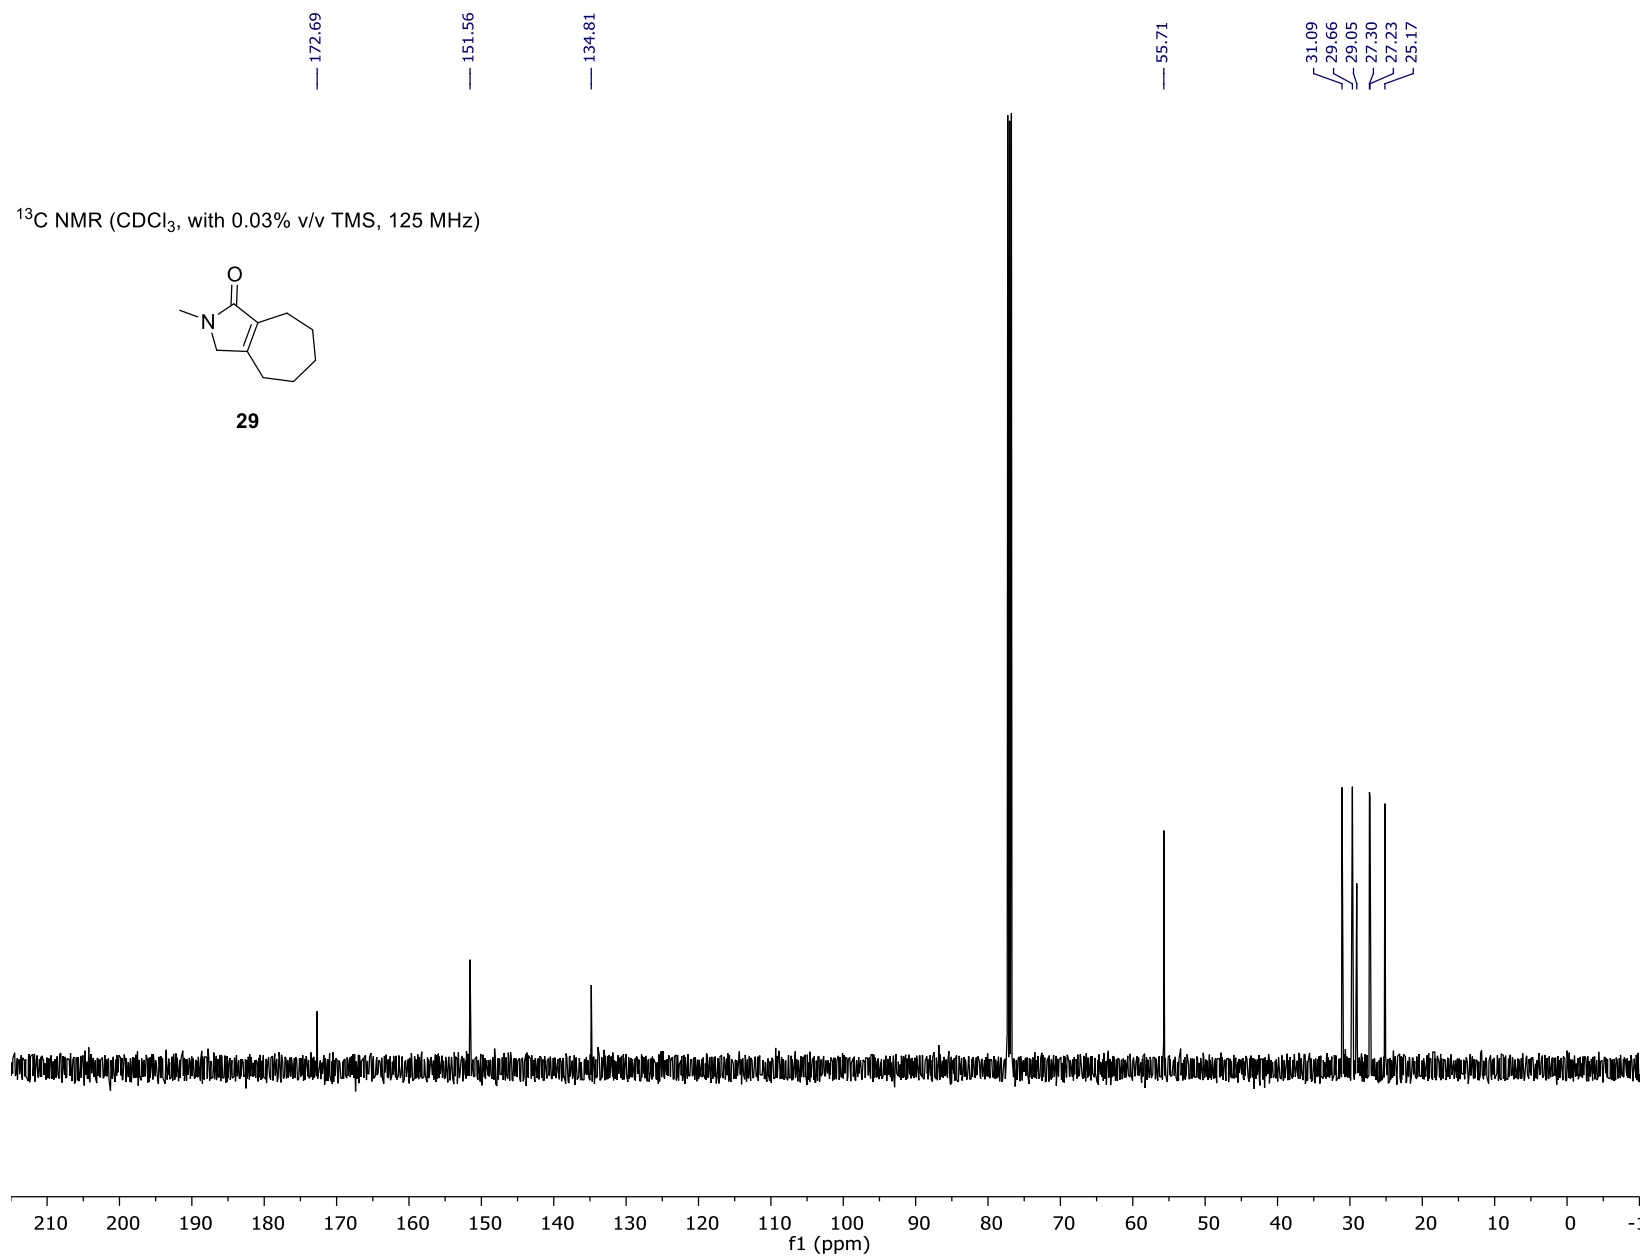

$^1\text{H}$  NMR ( $\text{CDCl}_3$ , with 0.03% v/v TMS, 500 MHz)

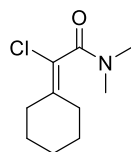

**30a**

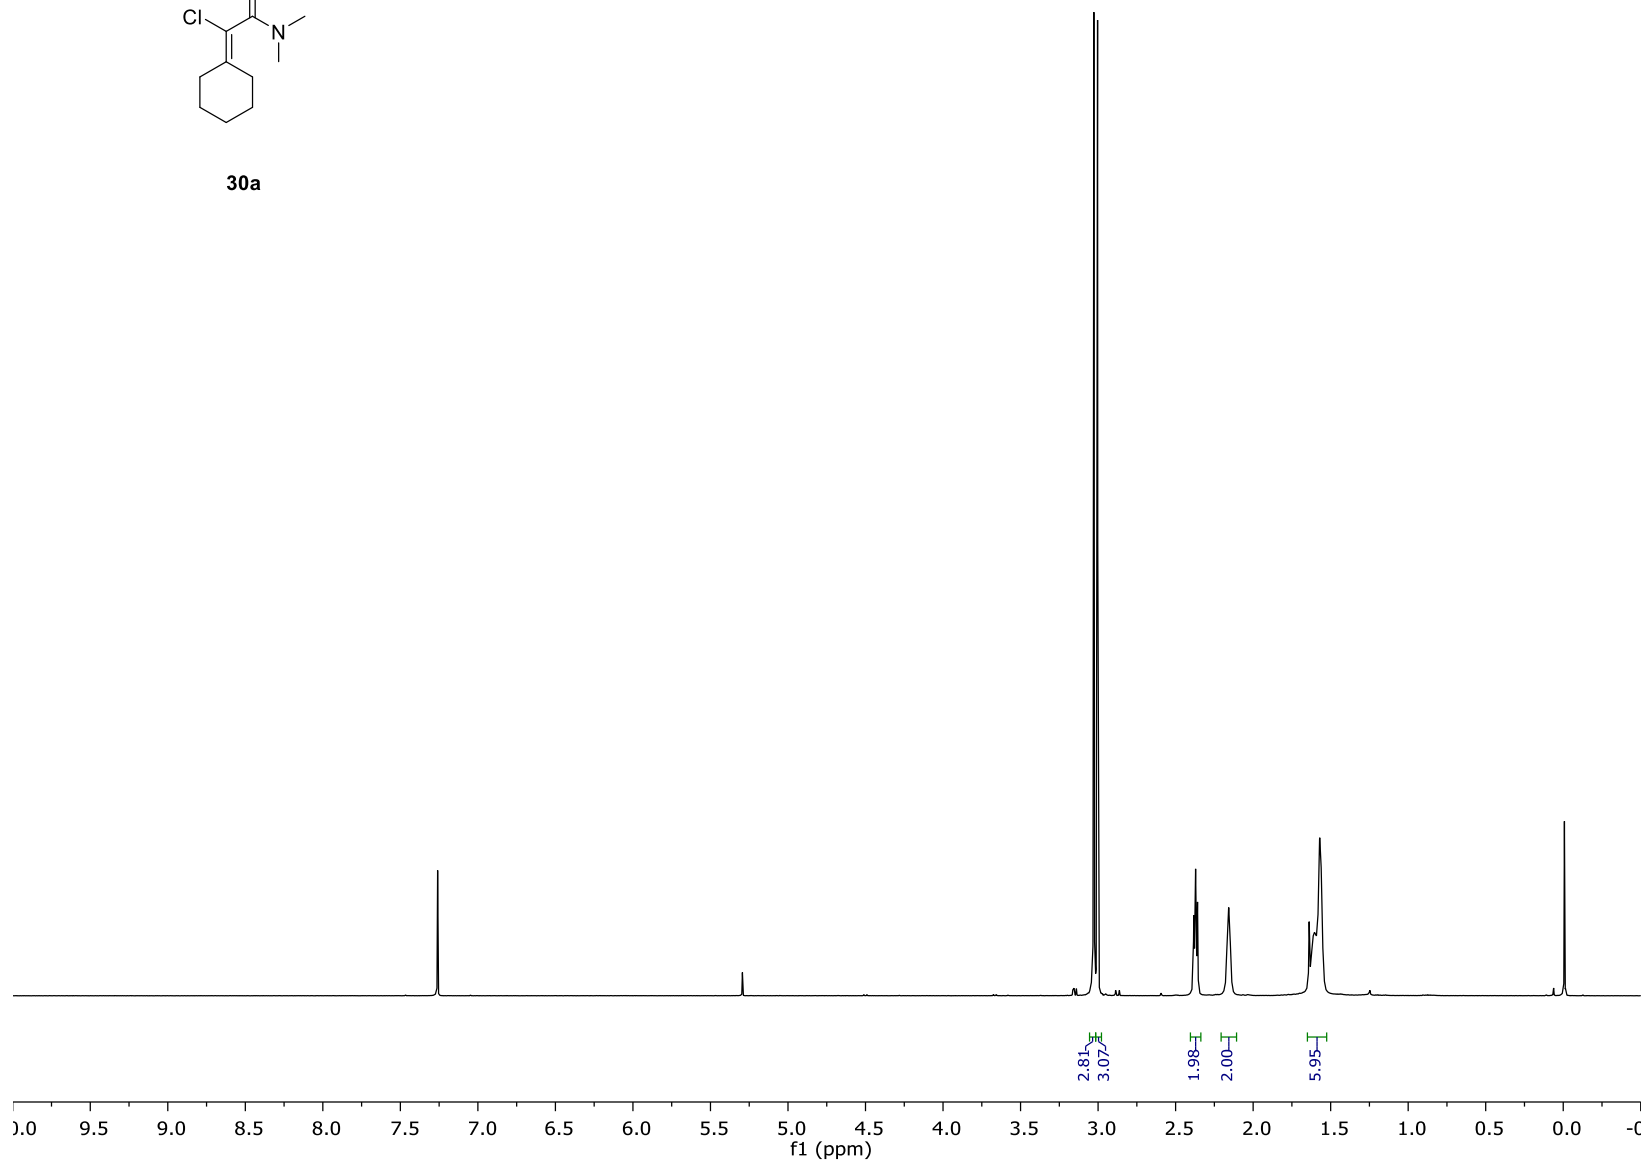

$^{13}\text{C}$  NMR ( $\text{CDCl}_3$ , with 0.03% v/v TMS, 125 MHz)

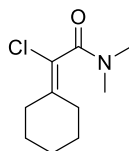

**30a**

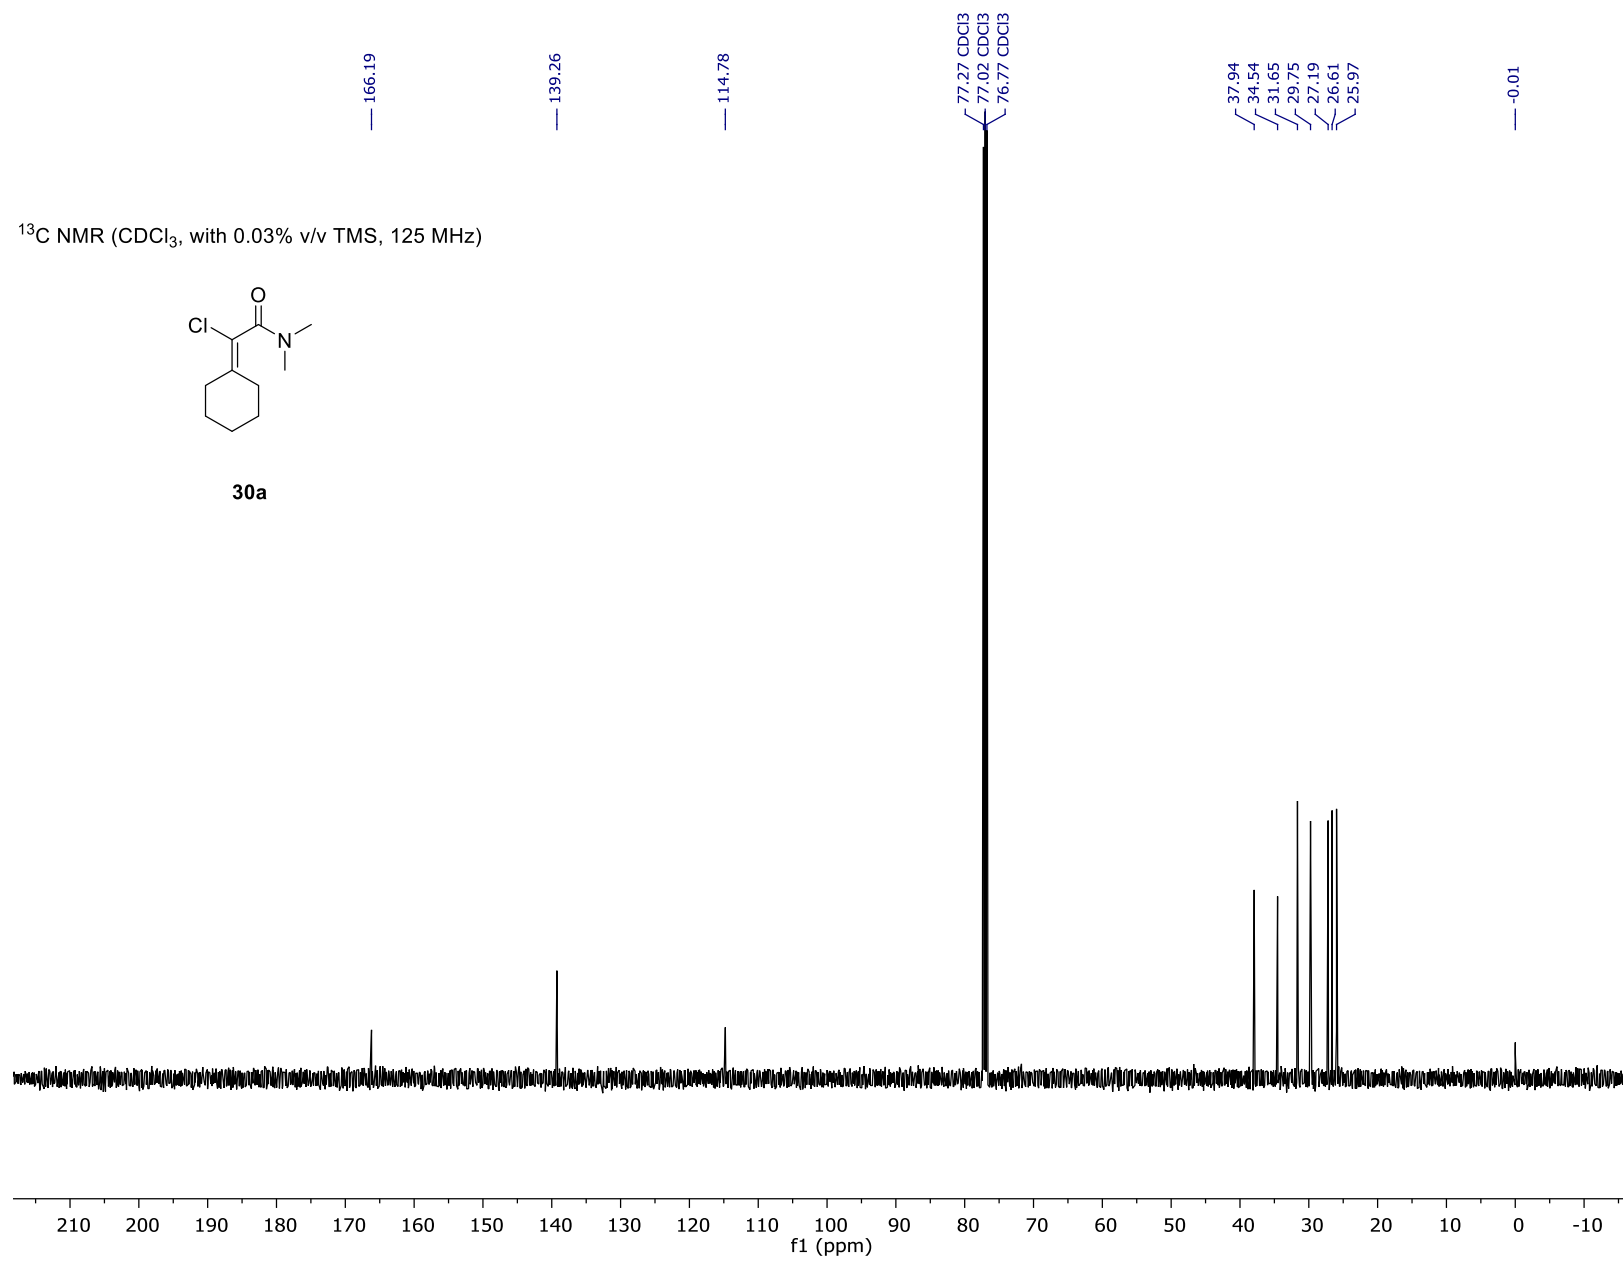

$^1\text{H}$  NMR ( $\text{CDCl}_3$ , with 0.03% v/v TMS, 125 MHz)

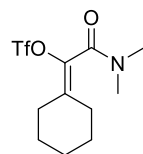

**30b**

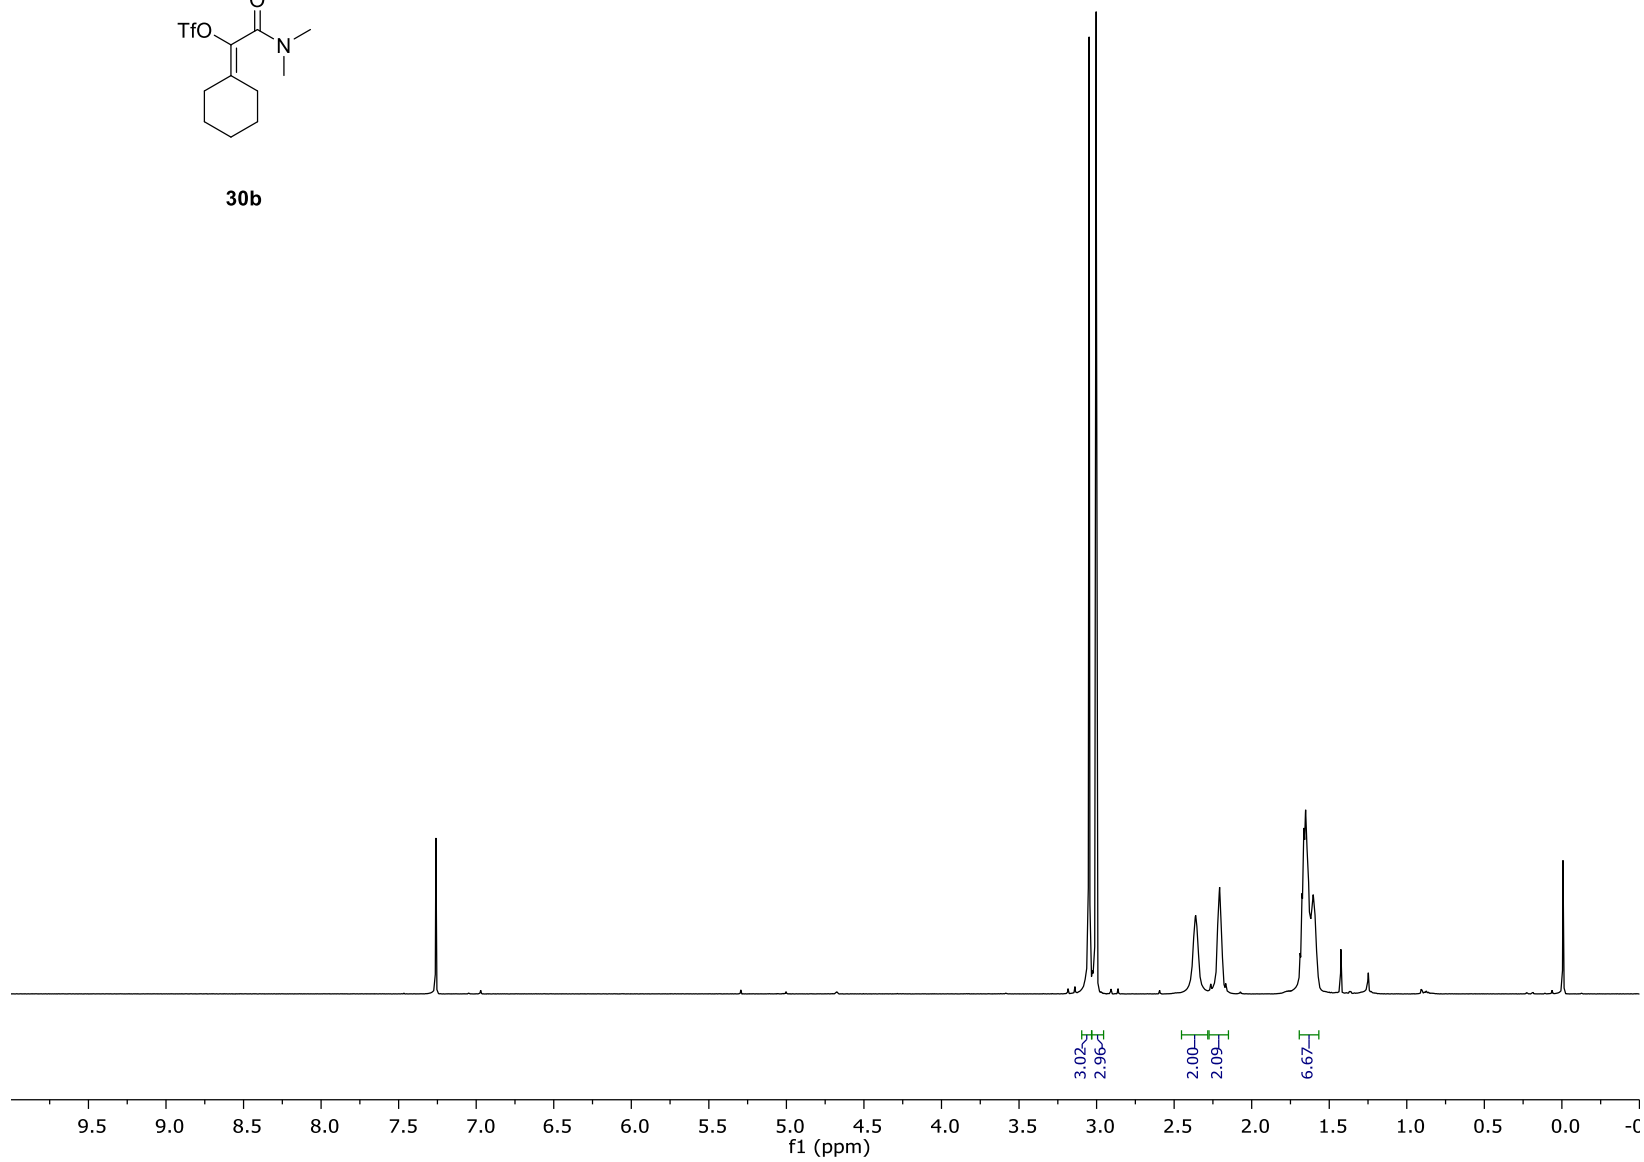

$^{19}\text{F}$  NMR ( $\text{CDCl}_3$ , 471 MHz)

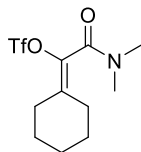

**30b**

— -73.06

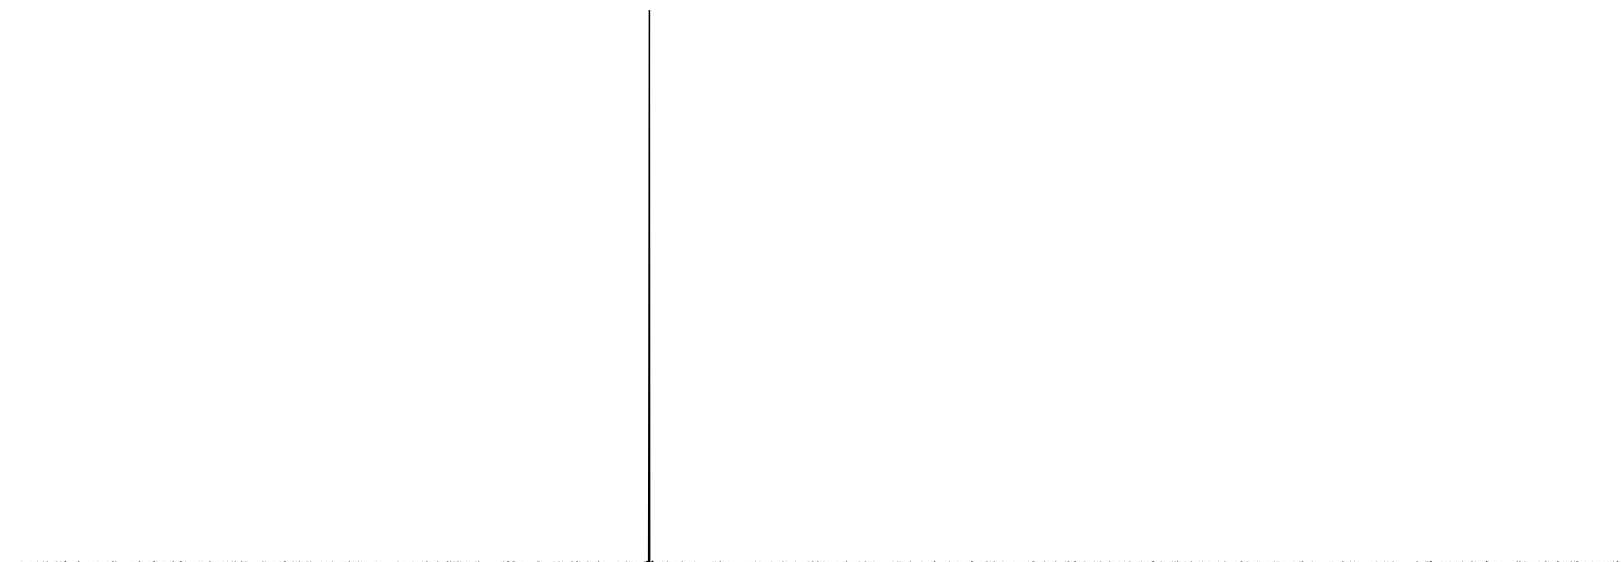

20 10 0 -10 -20 -30 -40 -50 -60 -70 -80 -90 -100 -110 -120 -130 -140 -150 -160 -170 -180 -190 -200 -210  
f1 (ppm)

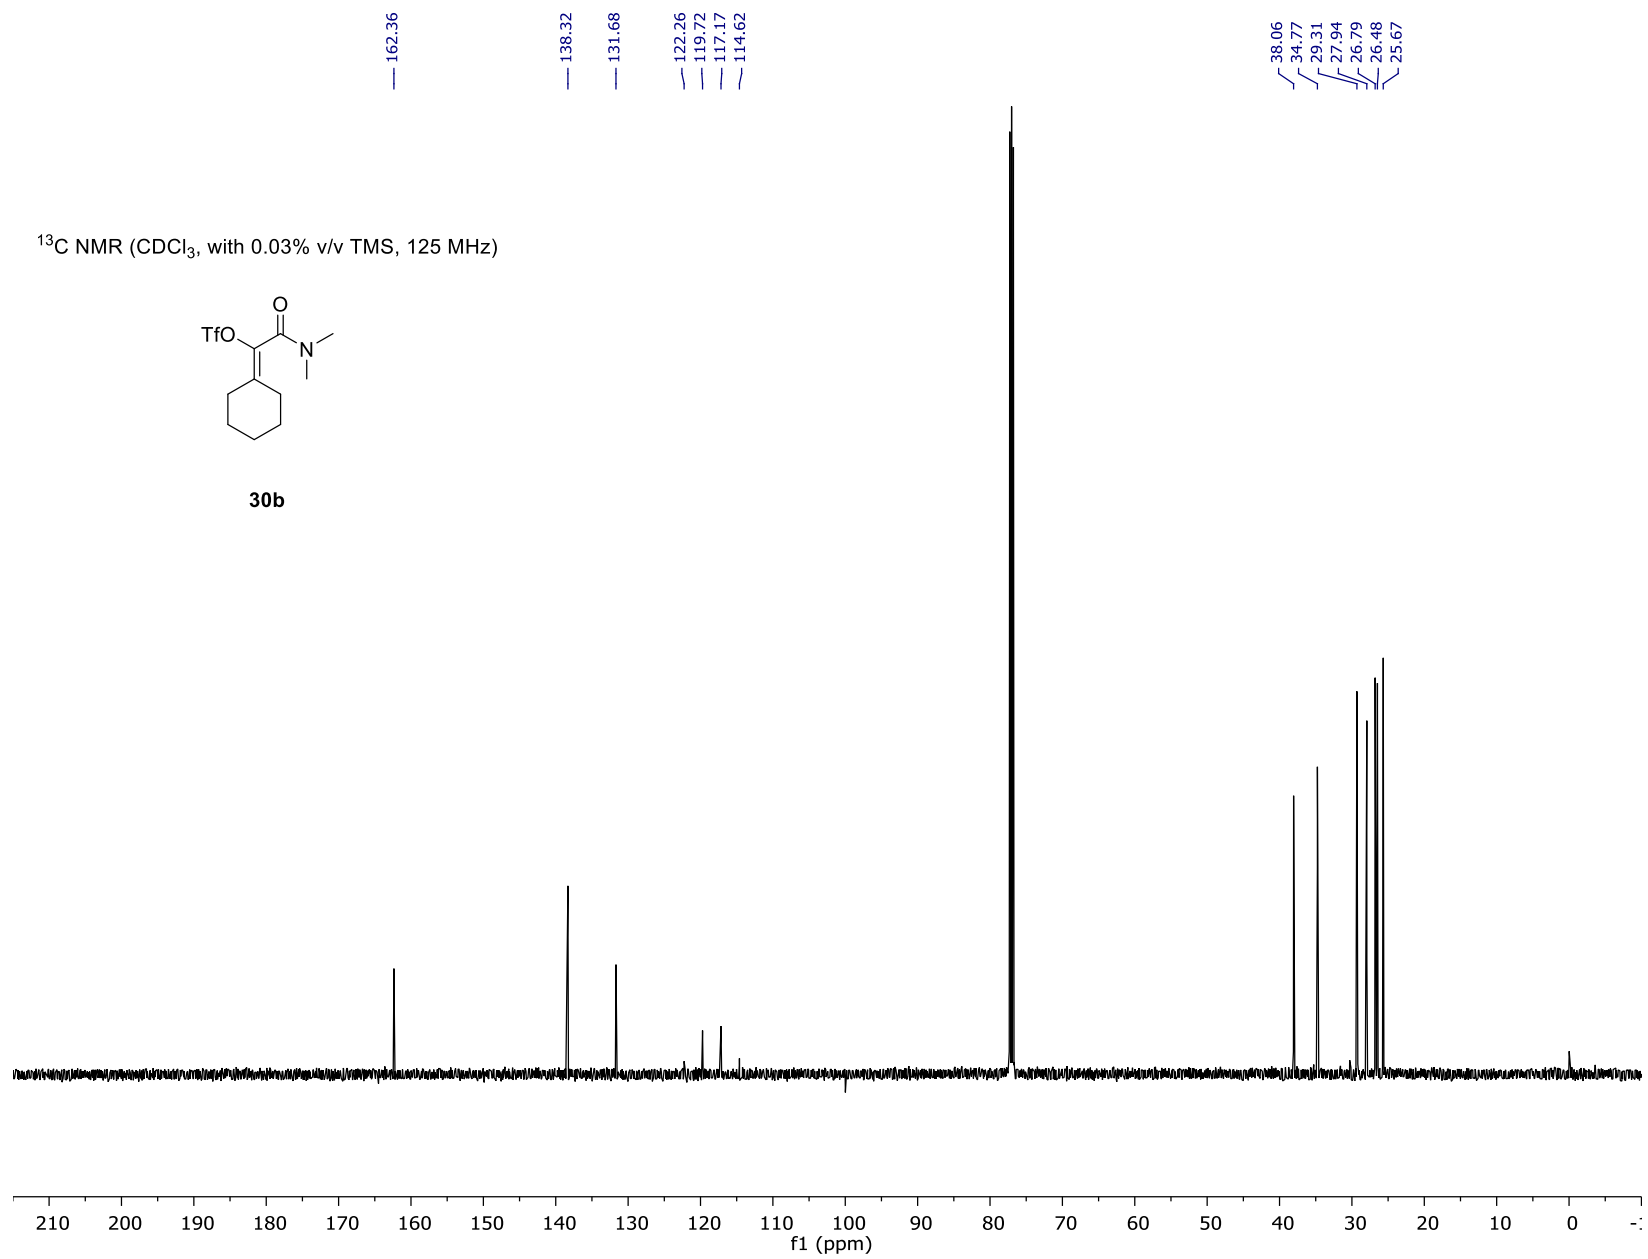

Supplement: NIHMS1553125-supplement-SI.pdf [file NIHMS1553125-supplement-SI.pdf]
